# Supplementary material for: Fracture strength analysis of titanium insert-reinforced zirconia abutments according to the axial height of the titanium insert with an internal connection
Source: PLoS One. 2021 Apr 1;16(4):e0249208. doi: 10.1371/journal.pone.0249208 (PMC8016344; doi:10.1371/journal.pone.0249208)
Supplement: S1 Data — (XLSX) [file pone.0249208.s001.xlsx]

## Sheet: S1_table1
Initial deformation load
Group	Axial height of titanium insert(mm)	Labial height of zirconia abutment(mm)	Specimen number	Load of Initial extension(Initial deformation load, N)
Gr1	1	3	1	69.19
			2	58.432
			3	160.546
			4	29.124
			5	29.122
			6	111.989
			7	94.619
			8	160.515
			mean ± standard deviation	89.19 ± 52.50
Gr2	3	3	1	272.22
			2	279.798
			3	343.324
			4	207.069
			5	294.271
			6	43.636
			7	133.509
			8	225.003
			9	216.126
			10	195.149
			11	179.173
			12	357.483
			mean ± standard deviation	190.46 ± 91.20
Gr3	3	5	1	209.234
			2	149.409
			3	184.894
			4	147.182
			5	191.926
			6	190.692
			7	208.286
			8	221.67
			9	115.489
			mean ± standard deviation	179.86 ± 35.08
Gr2,Gr3	3		mean ± standard deviation	185.92 ± 71.38
Gr4	5	3	1	213.497
			2	202.654
			3	278.102
			4	190.967
			5	173.357
			6	88.279
			7	188.997
			8	98.289
			9	298.359
			10	185.39
			11	69.061
			mean ± standard deviation	180.63 ± 72.76
Gr5	5	5	1	182.682
			2	222.014
			3	185.332
			4	184.078
			5	113.752
			6	158.678
			7	175.416
			8	148.268
			9	158.731
			10	162.213
			11	265.525
			mean ± standard deviation	177.88 ± 39.65
Gr4,Gr5	5		mean ± standard deviation	179.26 ± 57.20

## Sheet: S2_table2
Multiple pairwise comparisons of the initial deformation load by the axial height of the titanium insert
Axial height of Titanium insert	Load of Initial extension(Initial deformation load, N)			Kruskal-Wallis Analysis
1mm(Gr1)	69.19			rank					test statistic
	58.432			Gr	N	mean rank			χ2	14.816
	160.546			1mm	8	8.75			df	2
	29.124			3mm	21	32.52			asymp. Sig.	0.001
	29.122			5mm	22	26.05
	111.989			sum	51
	94.619
	160.515
mean ± standard deviation	89.19 ± 52.50			Mann-Whitney test
3mm(Gr2, Gr4)	272.22
	279.798			rank					test statistic
	343.324			Gr	N	mean rank	rank sum		Mann-Whitney U	14
	207.069			1mm	8	6.25	50		asymp. Sig.	0.002
	294.271			3mm	21	18.33	385		Exact sig.	.000b
	43.636			sum	29
	133.509
	225.003
	216.126			rank					test statistic
	195.149			Gr	N	mean rank	rank sum		Mann-Whitney U	20
	179.173			1mm	8	7	56		asymp. Sig.	0.001
	357.483			5mm	22	18.59	409		Exact sig.	.001b
	209.234			sum	30
	149.409
	184.894
	147.182			rank					test statistic
	191.926			Gr	N	mean rank	rank sum		Mann-Whitney U	164
	190.692			3mm	21	25.19	529		asymp. Sig.	0.593
	208.286			5mm	22	18.95	417
	221.67			sum	43
	115.489								* P-value <0.017 (adjusted by Bonferroni's method).
mean ± standard deviation	185.92 ± 71.38
5mm(Gr3, Gr5)	213.497
	202.654
	278.102
	190.967
	173.357
	88.279
	188.997
	98.289
	298.359
	185.39
	69.061
	182.682
	222.014
	185.332
	184.078
	113.752
	158.678
	175.416
	148.268
	158.731
	162.213
	265.525
mean ± standard deviation	179.26 ± 57.20

## Sheet: S3_table3
Fracture load
Group	Axial height of titanium insert(mm)	Labial height of zirconia abutment(mm)	Specimen number	Load of maximum extension(Fracture load,N)
Gr1	1	3	1	380.18
			2	331.6
			3	439
			4	319.68
			5	368.65
			6	302.45
			7	320.09
			8	432.44
			mean ± standard deviation	361.75 ± 2.41
Gr2	3	3	1	449.54
			2	466.96
			3	454.8
			4	425.8
			5	706.6
			6	1099.57
			7	326.86
			8	395.63
			9	301.21
			10	591.65
			11	385.7
			12	504.57
			mean ± standard deviation	509.07 ± 216.22
Gr3	3	5	1	427.97
			2	481.32
			3	1071.53
			4	328.84
			5	580.84
			6	429.78
			7	628.44
			8	577.38
			9	500.39
			mean ± standard deviation	558.50 ± 213.50
Gr2,Gr3	3		mean ± standard deviation	530.26 ± 211.12
Gr4	5	3	1	1201.98
			2	980.27
			3	1728.97
			4	713.27
			5	527.18
			6	479.19
			7	545.71
			8	302.92
			9	592.83
			10	762.97
			11	1128.44
			mean ± standard deviation	814.88 ± 412.73
Gr5	5	5	1	437.68
			2	421.28
			3	345.2
			4	546.52
			5	547.35
			6	482.43
			7	575.38
			8	686.62
			9	520.94
			10	920.52
			11	1210.47
			mean ± standard deviation	608.54 ± 251.20
Gr4,Gr5	5		mean ± standard deviation	711.7 ± 349.77

## Sheet: S4_table4
Multiple pairwise comparisons of the fracture load by the axial height of the titanium insert
Axial height of Titanium insert	Load of maximum extension(Fracture load)			Kruskal-Wallis Analysis
1mm(Gr1)	380.18			rank					test statistic
	331.6			Gr	N	mean rank			χ2	15.177
	439			1mm	8	9.75			df	2
	319.68			3mm	21	24.48			asymp. Sig.	0.001
	368.65			5mm	22	33.36
	302.45			sum	51
	320.09
	432.44
mean ± standard deviation	361.75 ± 2.41			Mann-Whitney test
3mm(Gr2, Gr4)	449.54
	466.96			rank					test statistic
	454.8			Gr	N	mean rank	rank sum		Mann-Whitney U	28
	425.8			1mm	8	8	64		asymp. Sig.	0.006
	706.6			3mm	21	17.67	371		Exact sig.	.005b
	1099.57			sum	29
	326.86
	395.63
	301.21			rank					test statistic
	591.65			Gr	N	mean rank	rank sum		Mann-Whitney U	14
	385.7			1mm	8	6.25	50		asymp. Sig.	0.001
	504.57			5mm	22	18.86	415		Exact sig.	.000b
	427.97			sum	30
	481.32
	1071.53
	328.84			rank					test statistic
	580.84			Gr	N	mean rank	rank sum		Mann-Whitney U	143
	429.78			3mm	21	17.81	374		asymp. Sig.	0.033
	628.44			5mm	22	26	572
	577.38			sum	43
	500.39								* P-value <0.017 (adjusted by Bonferroni's method).
mean ± standard deviation	530.26 ± 211.12
5mm(Gr3, Gr5)	1201.98
	980.27
	1728.97
	713.27
	527.18
	479.19
	545.71
	302.92
	592.83
	762.97
	1128.44
	437.68
	421.28
	345.2
	546.52
	547.35
	482.43
	575.38
	686.62
	520.94
	920.52
	1210.47
mean ± standard deviation	711.7 ± 349.77

## Sheet: S5_Gr1 raw data
Series IX version 8.32.00 Version date: 10 Jun 2004
Test Date: 10 Oct 2018
Test Type: Compressive Method: 49
Operator Name: Kyeong-Mee Park Edit date: 00 Oct 2000
Units: SI Geometry: Rectangular
Machine type: ------- Machine Control: STANDARD
Data Rate: 10.000000 pts/sec Extensometer: Disabled
Crosshead Speed: 0.75000 mm/min
Temperature: 0 Deg F Humidity: 0 %
Auto-start: Disabled Separate dimension entry: Enabled
___________________________________________________
Gr1
Specimen: 1
Test end reason: Break detected
Width: 4.4000001 mm
Thickness: 1.0000000 mm
Spec gauge len: 25.0000000 mm
Platen Separ.: 101.5999985 mm
Number of data points: 1286
Maximum Load point: 1285 Maximum Load: 0.38018 kN
Maximum Extension point: 1286 Maximum Extension: 4.45395 mm
___________________________________________________
1	0	-9.7e-05
2	0.000397	-4.7e-05
3	0.002323	-5.8e-05
4	0.00374	-1e-05
5	0.00493	-2e-05
6	0.006233	-6.5e-05
7	0.007423	-9e-05
8	0.008727	-9e-06
9	0.01003	-4.3e-05
10	0.01122	4e-06
11	0.012523	1.2e-05
12	0.01377	2.6e-05
13	0.015073	-1.1e-05
14	0.016263	-2e-05
15	0.017453	-8.9e-05
16	0.0187	-9.7e-05
17	0.020003	1e-06
18	0.021307	-1.6e-05
19	0.022497	-1e-05
20	0.0238	2.4e-05
21	0.025047	6e-05
22	0.026293	5e-06
23	0.027483	6.9e-05
24	0.02873	-3.7e-05
25	0.029977	-0.000114
26	0.031223	2e-05
27	0.03247	-1.9e-05
28	0.033717	1.7e-05
29	0.035077	1.4e-05
30	0.036323	-4.8e-05
31	0.037513	-1.1e-05
32	0.03876	5e-06
33	0.03995	-1.4e-05
34	0.041253	-2e-05
35	0.042557	-5.3e-05
36	0.043747	-8.2e-05
37	0.04505	2e-06
38	0.046353	-5.2e-05
39	0.047543	-2.5e-05
40	0.048733	5.5e-05
41	0.04998	1.7e-05
42	0.051227	6.1e-05
43	0.05253	4.4e-05
44	0.053777	-3e-05
45	0.055023	-3.5e-05
46	0.056327	-3.2e-05
47	0.057573	-7.2e-05
48	0.058763	-1.1e-05
49	0.059953	-3.5e-05
50	0.0612	-1.5e-05
51	0.062503	4.5e-05
52	0.063807	4e-05
53	0.065053	1.7e-05
54	0.0663	-2.1e-05
55	0.067547	-7.4e-05
56	0.068793	-2.8e-05
57	0.069983	-6e-06
58	0.07123	5e-06
59	0.07242	-2.8e-05
60	0.07378	4e-06
61	0.075027	6.6e-05
62	0.076273	2.5e-05
63	0.07752	5.4e-05
64	0.078823	-3.3e-05
65	0.080013	-1.4e-05
66	0.081203	2e-06
67	0.082507	-1.5e-05
68	0.083753	5e-06
69	0.085057	2e-06
70	0.086303	-1.4e-05
71	0.087493	-1.5e-05
72	0.088797	0.000128
73	0.0901	-1e-06
74	0.09129	-1.6e-05
75	0.09248	-4.7e-05
76	0.09367	-7.2e-05
77	0.094973	9e-06
78	0.096333	4.5e-05
79	0.097523	-4e-06
80	0.098827	-5.7e-05
81	0.100073	-4.3e-05
82	0.10132	6e-06
83	0.10251	-6e-06
84	0.103757	-5.2e-05
85	0.104947	-1.8e-05
86	0.106307	-3e-06
87	0.107553	2.6e-05
88	0.108743	-3.3e-05
89	0.10999	3.1e-05
90	0.11135	6.1e-05
91	0.11254	1.7e-05
92	0.11373	8.9e-05
93	0.11492	1.1e-05
94	0.116223	-7.3e-05
95	0.117527	-3.2e-05
96	0.118773	1.9e-05
97	0.12002	-6.5e-05
98	0.121323	-5e-06
99	0.12257	-3.3e-05
100	0.12376	8.9e-05
101	0.125007	2.5e-05
102	0.126197	4.2e-05
103	0.127557	-3e-06
104	0.128803	-2.6e-05
105	0.13005	-1.5e-05
106	0.131297	-4.8e-05
107	0.1326	2.9e-05
108	0.13379	-3.9e-05
109	0.13498	-2.4e-05
110	0.136227	1.1e-05
111	0.137473	-3.3e-05
112	0.138777	3.2e-05
113	0.140023	-6.4e-05
114	0.14127	-1.9e-05
115	0.142573	-6.5e-05
116	0.14382	-2.6e-05
117	0.14501	-3.7e-05
118	0.1462	-9.8e-05
119	0.147447	-3.5e-05
120	0.14875	3.4e-05
121	0.150053	-7.2e-05
122	0.151243	7e-06
123	0.15249	3.9e-05
124	0.153793	-5.7e-05
125	0.155097	-3e-06
126	0.15623	-1.3e-05
127	0.157477	-1.9e-05
128	0.158667	-6e-05
129	0.160027	-4.9e-05
130	0.16133	1e-05
131	0.16252	-7.2e-05
132	0.163823	4.1e-05
133	0.16507	-1e-05
134	0.166317	-5.5e-05
135	0.167507	4e-06
136	0.168753	-7.3e-05
137	0.169943	-1.5e-05
138	0.171247	-0.000135
139	0.172493	1e-06
140	0.17374	6e-05
141	0.174987	-3.8e-05
142	0.176347	3.2e-05
143	0.177537	1.2e-05
144	0.178727	-2.6e-05
145	0.179973	5.4e-05
146	0.181277	-2.8e-05
147	0.18258	-3.7e-05
148	0.18377	-6.2e-05
149	0.185073	-3.5e-05
150	0.18632	-1.8e-05
151	0.187567	2.5e-05
152	0.188757	2.1e-05
153	0.190003	7e-06
154	0.191193	-3.7e-05
155	0.192497	-2.9e-05
156	0.1938	-5.8e-05
157	0.19499	-4.8e-05
158	0.196293	-3e-05
159	0.197597	3.5e-05
160	0.198787	1.5e-05
161	0.199977	-1.9e-05
162	0.201223	3.5e-05
163	0.20247	4.1e-05
164	0.203773	-4.3e-05
165	0.20502	-4.4e-05
166	0.206267	-4.5e-05
167	0.207513	-4e-05
168	0.208817	-7.2e-05
169	0.210007	7e-05
170	0.211253	1e-05
171	0.212443	-4.3e-05
172	0.213747	7.9e-05
173	0.21505	-6e-06
174	0.216297	-5e-05
175	0.217543	-3.5e-05
176	0.218847	-3.7e-05
177	0.220037	1e-06
178	0.221227	-3.4e-05
179	0.222473	7.6e-05
180	0.22372	-4.3e-05
181	0.225023	-4e-06
182	0.226327	5.6e-05
183	0.227517	1e-06
184	0.22882	-4.9e-05
185	0.230067	-8e-06
186	0.231257	-3.4e-05
187	0.232503	6.4e-05
188	0.23375	-5.4e-05
189	0.234997	5e-06
190	0.2363	1.7e-05
191	0.237547	-9e-06
192	0.238793	-1.5e-05
193	0.240097	2e-05
194	0.241343	-2.8e-05
195	0.242477	-3.9e-05
196	0.243723	-1.8e-05
197	0.244913	-2.9e-05
198	0.246273	-6.7e-05
199	0.247577	3.7e-05
200	0.248767	2e-05
201	0.25007	2.6e-05
202	0.251317	7e-06
203	0.252564	-1e-05
204	0.253753	3.5e-05
205	0.255	-8.2e-05
206	0.25619	-8e-06
207	0.257493	0
208	0.258797	-9.5e-05
209	0.260044	5.7e-05
210	0.26129	6e-05
211	0.262594	-3.7e-05
212	0.263727	-9e-06
213	0.264973	-4e-06
214	0.26622	-2.9e-05
215	0.267523	-9e-06
216	0.26877	-5.2e-05
217	0.270017	2.2e-05
218	0.27132	-5e-05
219	0.272567	-5.4e-05
220	0.273813	2.9e-05
221	0.275003	6e-06
222	0.27625	1.1e-05
223	0.27744	-1.4e-05
224	0.278744	-1.9e-05
225	0.280047	-3.4e-05
226	0.281293	5e-06
227	0.282597	-3e-06
228	0.283844	-5.4e-05
229	0.285034	1.1e-05
230	0.286224	9.5e-05
231	0.28747	3.9e-05
232	0.288717	5.5e-05
233	0.290077	-2.8e-05
234	0.291324	-8.8e-05
235	0.292514	-4.7e-05
236	0.293817	-1.5e-05
237	0.295063	-8e-06
238	0.296254	1.7e-05
239	0.297444	-4e-05
240	0.298634	6e-06
241	0.299994	1.4e-05
242	0.301297	8.4e-05
243	0.302543	2.6e-05
244	0.30379	-4.4e-05
245	0.305037	-2e-05
246	0.306284	2.5e-05
247	0.307474	-4.3e-05
248	0.30872	-8.2e-05
249	0.30991	2.4e-05
250	0.31127	2e-06
251	0.312574	-1e-05
252	0.313764	2.9e-05
253	0.315067	0
254	0.316314	-7.7e-05
255	0.317504	-2.1e-05
256	0.31875	0
257	0.31994	-5.3e-05
258	0.321187	-2.8e-05
259	0.322547	8.1e-05
260	0.323794	6.5e-05
261	0.32504	7e-06
262	0.326344	3.6e-05
263	0.32759	-3e-05
264	0.328724	-1e-06
265	0.32997	2.1e-05
266	0.33116	-9e-06
267	0.33252	-4.9e-05
268	0.333824	0
269	0.335014	2.9e-05
270	0.336317	7.5e-05
271	0.337564	4.1e-05
272	0.33881	2.2e-05
273	0.34	7e-06
274	0.341247	-2.9e-05
275	0.342437	-2e-05
276	0.343797	-3.7e-05
277	0.345044	-3.8e-05
278	0.346347	-9e-06
279	0.347594	4.6e-05
280	0.34884	1.9e-05
281	0.35003	5.7e-05
282	0.351277	6.5e-05
283	0.35241	3.2e-05
284	0.35377	-1.5e-05
285	0.355074	-7.4e-05
286	0.356264	-6.8e-05
287	0.357567	1.4e-05
288	0.35887	-2.4e-05
289	0.36006	-3e-06
290	0.36125	1.1e-05
291	0.362497	-4e-05
292	0.36363	1.1e-05
293	0.36499	-4e-06
294	0.366294	9e-06
295	0.36754	-2.8e-05
296	0.368844	-1.4e-05
297	0.37009	-1.5e-05
298	0.37128	-4.4e-05
299	0.37247	2.6e-05
300	0.373774	-3.3e-05
301	0.374964	1.2e-05
302	0.376324	1.9e-05
303	0.37757	-4e-06
304	0.378817	1.2e-05
305	0.380064	-2.3e-05
306	0.38131	-4.9e-05
307	0.3825	-1.9e-05
308	0.383747	0.000183
309	0.384937	0.000857
310	0.38624	0.001562
311	0.387544	0.00236
312	0.388734	0.003197
313	0.390037	0.004047
314	0.39134	0.004865
315	0.392587	0.005799
316	0.39372	0.006555
317	0.395024	0.007478
318	0.396214	0.008414
319	0.397517	0.00941
320	0.39882	0.010363
321	0.40001	0.011268
322	0.401314	0.012169
323	0.402617	0.013005
324	0.403807	0.013774
325	0.404997	0.014503
326	0.406244	0.015328
327	0.40749	0.015977
328	0.408794	0.016765
329	0.41004	0.017374
330	0.411287	0.017987
331	0.41259	0.018586
332	0.413837	0.01919
333	0.415027	0.019588
334	0.416217	0.020077
335	0.417464	0.020626
336	0.418767	0.021078
337	0.420014	0.0216
338	0.42126	0.021975
339	0.422507	0.022453
340	0.42381	0.022944
341	0.425057	0.023267
342	0.426247	0.023637
343	0.427494	0.024043
344	0.428684	0.024361
345	0.430044	0.024889
346	0.43129	0.025245
347	0.432537	0.02556
348	0.433784	0.025991
349	0.435087	0.026395
350	0.436277	0.026816
351	0.437524	0.027119
352	0.43877	0.027497
353	0.43996	0.027758
354	0.441264	0.028189
355	0.442567	0.028602
356	0.443757	0.02895
357	0.44506	0.029259
358	0.446307	0.029697
359	0.447497	0.030045
360	0.448744	0.030386
361	0.449934	0.030793
362	0.451237	0.031134
363	0.45254	0.031469
364	0.453787	0.03184
365	0.455034	0.032156
366	0.456337	0.032498
367	0.457584	0.032895
368	0.458717	0.033232
369	0.46002	0.033642
370	0.46121	0.033976
371	0.462514	0.034384
372	0.463817	0.034706
373	0.465064	0.034996
374	0.46631	0.035376
375	0.467614	0.035693
376	0.468747	0.036018
377	0.469994	0.036427
378	0.47124	0.036714
379	0.472487	0.037121
380	0.47379	0.037447
381	0.475037	0.037804
382	0.476284	0.038158
383	0.477587	0.038557
384	0.478834	0.038855
385	0.480024	0.039119
386	0.48127	0.039544
387	0.48246	0.039787
388	0.483764	0.040194
389	0.485067	0.040517
390	0.486257	0.040832
391	0.48756	0.041211
392	0.488807	0.041539
393	0.490054	0.041886
394	0.491244	0.042119
395	0.49249	0.042459
396	0.49368	0.042722
397	0.49504	0.043153
398	0.496287	0.043472
399	0.497534	0.04382
400	0.498837	0.044162
401	0.500084	0.044404
402	0.501274	0.044774
403	0.502464	0.045108
404	0.50371	0.045417
405	0.505014	0.045712
406	0.506317	0.046051
407	0.507564	0.046362
408	0.50881	0.046762
409	0.510057	0.047206
410	0.511304	0.047438
411	0.512437	0.04766
412	0.51374	0.048123
413	0.51493	0.048391
414	0.51629	0.048772
415	0.517594	0.04912
416	0.518784	0.049488
417	0.520087	0.050117
418	0.521334	0.050586
419	0.522524	0.051152
420	0.52377	0.051635
421	0.525017	0.052294
422	0.526207	0.052798
423	0.52751	0.05338
424	0.528757	0.053864
425	0.530004	0.054296
426	0.53125	0.054904
427	0.53261	0.055526
428	0.533744	0.055887
429	0.53499	0.056489
430	0.53618	0.056967
431	0.537484	0.057547
432	0.538787	0.058068
433	0.540034	0.058536
434	0.541337	0.058967
435	0.542584	0.059492
436	0.54383	0.059922
437	0.54502	0.060419
438	0.54621	0.06078
439	0.5474	0.061183
440	0.54876	0.061774
441	0.550064	0.062181
442	0.55131	0.062466
443	0.552557	0.06296
444	0.553804	0.063282
445	0.55505	0.063622
446	0.55624	0.063845
447	0.55743	0.064094
448	0.558734	0.064387
449	0.560037	0.064667
450	0.561284	0.064823
451	0.56253	0.064802
452	0.563834	0.065491
453	0.56508	0.065986
454	0.56627	0.066607
455	0.567517	0.067222
456	0.56865	0.067812
457	0.57001	0.068571
458	0.571314	0.06924
459	0.572504	0.069752
460	0.573807	0.070439
461	0.57511	0.070908
462	0.5763	0.071408
463	0.57749	0.071804
464	0.578794	0.072305
465	0.579984	0.07266
466	0.581287	0.073174
467	0.582534	0.073431
468	0.583724	0.073461
469	0.585027	0.073482
470	0.58633	0.073749
471	0.58752	0.073855
472	0.588767	0.073741
473	0.5899	0.073498
474	0.59126	0.072874
475	0.592564	0.071589
476	0.593754	0.06919
477	0.595057	0.066081
478	0.59636	0.063637
479	0.597607	0.062406
480	0.59874	0.061769
481	0.599987	0.061432
482	0.601177	0.061292
483	0.602537	0.061487
484	0.603784	0.061484
485	0.60503	0.061502
486	0.606277	0.061554
487	0.60758	0.061677
488	0.608827	0.06165
489	0.60996	0.061858
490	0.611264	0.062195
491	0.612454	0.062474
492	0.613757	0.062864
493	0.615004	0.062771
494	0.61625	0.062831
495	0.617554	0.062989
496	0.6188	0.063173
497	0.61999	0.063312
498	0.621237	0.063671
499	0.622427	0.064218
500	0.62373	0.064713
501	0.625034	0.065302
502	0.626224	0.065882
503	0.627527	0.066281
504	0.62883	0.06649
505	0.630077	0.066183
506	0.631267	0.066001
507	0.632514	0.066084
508	0.633647	0.066013
509	0.635007	0.066483
510	0.63631	0.066931
511	0.6375	0.067158
512	0.638747	0.067496
513	0.640107	0.067764
514	0.641297	0.067927
515	0.642487	0.068084
516	0.643734	0.068349
517	0.64498	0.068392
518	0.646284	0.068754
519	0.64753	0.068981
520	0.648777	0.069111
521	0.65008	0.069405
522	0.651327	0.069583
523	0.652517	0.069629
524	0.653707	0.069755
525	0.654954	0.069971
526	0.656257	0.070163
527	0.65756	0.070342
528	0.65875	0.070499
529	0.660054	0.070871
530	0.6613	0.071214
531	0.662547	0.071615
532	0.663737	0.071868
533	0.66504	0.072395
534	0.666174	0.072532
535	0.667534	0.073158
536	0.668837	0.07352
537	0.670027	0.073921
538	0.671274	0.074154
539	0.672577	0.074434
540	0.673767	0.074801
541	0.674957	0.075214
542	0.67626	0.075588
543	0.677507	0.075831
544	0.67881	0.076079
545	0.680057	0.076265
546	0.681304	0.076683
547	0.68255	0.077078
548	0.683797	0.077402
549	0.684987	0.077739
550	0.686234	0.07805
551	0.687424	0.078617
552	0.688784	0.079088
553	0.69003	0.079551
554	0.691277	0.079931
555	0.69258	0.080407
556	0.693827	0.080755
557	0.695017	0.081217
558	0.696207	0.081412
559	0.69751	0.081945
560	0.6987	0.082154
561	0.700004	0.082665
562	0.701307	0.083063
563	0.702554	0.083291
564	0.7038	0.083614
565	0.705104	0.083818
566	0.706237	0.083987
567	0.707484	0.08427
568	0.70873	0.084433
569	0.709977	0.084428
570	0.71128	0.084472
571	0.712527	0.084435
572	0.71383	0.0846
573	0.715077	0.085076
574	0.716324	0.085552
575	0.717457	0.085867
576	0.718704	0.086392
577	0.71995	0.086853
578	0.72131	0.087428
579	0.722557	0.08793
580	0.723747	0.08835
581	0.725051	0.088852
582	0.726354	0.089351
583	0.727544	0.089809
584	0.728734	0.090096
585	0.730037	0.090521
586	0.731227	0.090744
587	0.73253	0.09132
588	0.733777	0.091542
589	0.735024	0.091828
590	0.736327	0.092182
591	0.737574	0.092467
592	0.738707	0.092595
593	0.739954	0.092858
594	0.741144	0.093067
595	0.742504	0.093327
596	0.743807	0.093585
597	0.745054	0.093788
598	0.7463	0.093912
599	0.747604	0.094257
600	0.748794	0.094648
601	0.749984	0.094737
602	0.75123	0.094971
603	0.75242	0.09503
604	0.75378	0.095339
605	0.755084	0.095572
606	0.756274	0.095578
607	0.757577	0.095849
608	0.758824	0.096097
609	0.760014	0.096399
610	0.761204	0.096875
611	0.762507	0.097357
612	0.763754	0.097855
613	0.765057	0.098232
614	0.766304	0.09854
615	0.76755	0.098977
616	0.768797	0.099359
617	0.7701	0.099825
618	0.771234	0.100099
619	0.77248	0.100533
620	0.77367	0.100823
621	0.77503	0.101371
622	0.776334	0.101719
623	0.77758	0.101975
624	0.778827	0.102249
625	0.780074	0.102582
626	0.781321	0.102883
627	0.782454	0.103087
628	0.783757	0.103539
629	0.784947	0.103832
630	0.786307	0.104243
631	0.787554	0.10443
632	0.7888	0.104646
633	0.790047	0.104993
634	0.79135	0.105208
635	0.79254	0.105418
636	0.79373	0.105665
637	0.79492	0.10609
638	0.796224	0.106275
639	0.797527	0.106725
640	0.798774	0.106831
641	0.800077	0.10714
642	0.801324	0.107147
643	0.802571	0.107234
644	0.80376	0.107219
645	0.80495	0.107182
646	0.806197	0.107092
647	0.807557	0.107619
648	0.808804	0.107908
649	0.809994	0.108215
650	0.811297	0.108611
651	0.8126	0.108888
652	0.81379	0.10922
653	0.815037	0.109533
654	0.816227	0.109815
655	0.817474	0.110033
656	0.818777	0.110561
657	0.820024	0.110995
658	0.821271	0.111238
659	0.822574	0.111855
660	0.823821	0.112305
661	0.82501	0.112707
662	0.826257	0.113118
663	0.82739	0.113514
664	0.82875	0.113984
665	0.830054	0.114398
666	0.831244	0.114611
667	0.832547	0.115023
668	0.833851	0.1151
669	0.83504	0.115185
670	0.836231	0.115298
671	0.837477	0.115712
672	0.838667	0.115914
673	0.840027	0.116369
674	0.84133	0.116663
675	0.84252	0.116922
676	0.843824	0.117254
677	0.845071	0.117512
678	0.846317	0.117713
679	0.84745	0.118001
680	0.848754	0.118165
681	0.850001	0.118191
682	0.851304	0.11846
683	0.852551	0.118603
684	0.853797	0.118601
685	0.855044	0.118658
686	0.856347	0.118662
687	0.85748	0.118923
688	0.858727	0.119119
689	0.859974	0.119663
690	0.861221	0.120044
691	0.86258	0.120575
692	0.863771	0.120828
693	0.865074	0.12118
694	0.866321	0.121479
695	0.867567	0.121742
696	0.868757	0.122
697	0.870004	0.122412
698	0.871194	0.122533
699	0.872497	0.122992
700	0.873801	0.123361
701	0.87499	0.123669
702	0.876294	0.124027
703	0.877597	0.124392
704	0.878787	0.124563
705	0.879977	0.124797
706	0.881224	0.125221
707	0.882471	0.125463
708	0.883774	0.125797
709	0.88502	0.125936
710	0.886267	0.126228
711	0.887571	0.126534
712	0.888817	0.126739
713	0.890007	0.126782
714	0.891254	0.12697
715	0.897544	0.127908
716	0.903664	0.127756
717	0.910067	0.128737
718	0.916301	0.130392
719	0.922477	0.131493
720	0.928767	0.132601
721	0.935001	0.134034
722	0.941347	0.135185
723	0.947467	0.136593
724	0.953814	0.137668
725	0.960047	0.138317
726	0.966224	0.138506
727	0.972514	0.14028
728	0.978634	0.140867
729	0.985094	0.14169
730	0.991271	0.142391
731	0.997504	0.143378
732	1.00379	0.144347
733	1.00997	0.145148
734	1.01632	0.146131
735	1.02249	0.146968
736	1.02884	0.148079
737	1.03507	0.148703
738	1.04125	0.148979
739	1.04754	0.149906
740	1.05372	0.149929
741	1.06006	0.149677
742	1.06624	0.151629
743	1.07259	0.152351
744	1.07876	0.153062
745	1.085	0.15331
746	1.09129	0.154447
747	1.09746	0.155308
748	1.10387	0.155913
749	1.11004	0.156734
750	1.11628	0.156763
751	1.12257	0.1565
752	1.12874	0.155741
753	1.13503	0.15522
754	1.14121	0.155767
755	1.14761	0.155521
756	1.15373	0.155683
757	1.15997	0.155035
758	1.16626	0.153737
759	1.17249	0.153872
760	1.17884	0.153548
761	1.18501	0.15336
762	1.1913	0.153677
763	1.19759	0.154136
764	1.20371	0.153896
765	1.21006	0.15413
766	1.21618	0.153933
767	1.22258	0.154907
768	1.22882	0.156204
769	1.23505	0.156658
770	1.24128	0.157351
771	1.24746	0.157065
772	1.25381	0.157068
773	1.25998	0.157042
774	1.26633	0.156395
775	1.27256	0.156256
776	1.27874	0.155517
777	1.28503	0.155399
778	1.29126	0.155908
779	1.29755	0.155652
780	1.30379	0.154387
781	1.31008	0.154049
782	1.31625	0.152507
783	1.32249	0.151823
784	1.32878	0.151268
785	1.33495	0.150147
786	1.34136	0.151151
787	1.34753	0.151189
788	1.35377	0.150821
789	1.36006	0.151848
790	1.36623	0.151358
791	1.37252	0.150674
792	1.3787	0.149733
793	1.3851	0.148409
794	1.39128	0.147896
795	1.39751	0.14748
796	1.4038	0.146151
797	1.40998	0.145125
798	1.41633	0.145317
799	1.4225	0.145855
800	1.42879	0.146385
801	1.43503	0.146933
802	1.44126	0.147172
803	1.44755	0.148607
804	1.45367	0.148761
805	1.46007	0.149961
806	1.46625	0.150555
807	1.47254	0.151169
808	1.47877	0.152682
809	1.48501	0.154081
810	1.4913	0.154819
811	1.49747	0.156007
812	1.50382	0.157347
813	1.51	0.158921
814	1.51623	0.159871
815	1.52252	0.160759
816	1.52875	0.161018
817	1.53504	0.16169
818	1.54122	0.161458
819	1.54757	0.162547
820	1.5538	0.163125
821	1.55998	0.16341
822	1.56627	0.164112
823	1.57244	0.16553
824	1.57885	0.166259
825	1.58502	0.165875
826	1.59126	0.165885
827	1.59755	0.166093
828	1.60372	0.165454
829	1.61001	0.164175
830	1.61625	0.164243
831	1.62259	0.16495
832	1.62877	0.165252
833	1.635	0.165232
834	1.64129	0.165636
835	1.64747	0.166431
836	1.65382	0.166462
837	1.65999	0.165434
838	1.66628	0.165631
839	1.67257	0.166763
840	1.67875	0.166496
841	1.68504	0.16786
842	1.69116	0.168812
843	1.69756	0.169573
844	1.70374	0.170469
845	1.71003	0.171267
846	1.71626	0.172355
847	1.7225	0.173701
848	1.72884	0.173749
849	1.73502	0.174785
850	1.74131	0.17517
851	1.7476	0.176748
852	1.75372	0.176835
853	1.76001	0.177798
854	1.76624	0.178435
855	1.77259	0.179036
856	1.77877	0.179294
857	1.78506	0.179786
858	1.79135	0.178766
859	1.79747	0.178221
860	1.80381	0.177934
861	1.80993	0.176241
862	1.81628	0.175598
863	1.82251	0.175558
864	1.82875	0.174694
865	1.83504	0.175506
866	1.84121	0.175278
867	1.84756	0.175356
868	1.85368	0.175829
869	1.86008	0.175469
870	1.86632	0.175457
871	1.87249	0.17432
872	1.87878	0.170704
873	1.88496	0.168843
874	1.89131	0.169516
875	1.89754	0.170109
876	1.90383	0.168738
877	1.91006	0.168355
878	1.91624	0.167879
879	1.92253	0.167489
880	1.92865	0.166962
881	1.93511	0.166699
882	1.94129	0.167352
883	1.94752	0.167142
884	1.95381	0.167741
885	1.95999	0.168469
886	1.96628	0.168691
887	1.97245	0.168741
888	1.9788	0.168255
889	1.98503	0.167955
890	1.99121	0.167498
891	1.9975	0.167813
892	2.00373	0.167169
893	2.01008	0.166879
894	2.01626	0.167636
895	2.02255	0.167145
896	2.02884	0.167667
897	2.03496	0.168835
898	2.0413	0.170635
899	2.04743	0.172793
900	2.05383	0.173625
901	2.06	0.174811
902	2.06624	0.175137
903	2.07253	0.175507
904	2.0787	0.176898
905	2.08505	0.178829
906	2.09123	0.180275
907	2.09757	0.181181
908	2.10381	0.182823
909	2.10998	0.183924
910	2.11627	0.184683
911	2.12251	0.185902
912	2.1288	0.187203
913	2.13497	0.188919
914	2.14132	0.190206
915	2.14756	0.191323
916	2.15373	0.192661
917	2.16008	0.194106
918	2.1662	0.194944
919	2.1726	0.196025
920	2.17883	0.19654
921	2.18501	0.196399
922	2.19124	0.196648
923	2.19748	0.196475
924	2.20377	0.19627
925	2.20994	0.196102
926	2.21635	0.196154
927	2.22258	0.196488
928	2.22876	0.196511
929	2.23505	0.196449
930	2.24123	0.197134
931	2.24757	0.197562
932	2.25375	0.197937
933	2.26004	0.197158
934	2.26633	0.196516
935	2.27251	0.196345
936	2.2788	0.196349
937	2.28497	0.197141
938	2.29132	0.198141
939	2.2975	0.199087
940	2.30373	0.19985
941	2.31002	0.201071
942	2.31625	0.201776
943	2.3226	0.202238
944	2.32877	0.201689
945	2.33507	0.201759
946	2.3413	0.202263
947	2.34748	0.20291
948	2.35382	0.203852
949	2.35994	0.205227
950	2.36634	0.206605
951	2.37252	0.208215
952	2.37881	0.209306
953	2.38504	0.210808
954	2.39122	0.21179
955	2.39757	0.212763
956	2.40369	0.213259
957	2.41009	0.213928
958	2.41627	0.214778
959	2.4225	0.215204
960	2.42879	0.215496
961	2.43497	0.215946
962	2.44126	0.216542
963	2.44744	0.217817
964	2.45384	0.219154
965	2.46007	0.220393
966	2.46625	0.221203
967	2.47254	0.22279
968	2.47877	0.223943
969	2.48506	0.225364
970	2.49124	0.226107
971	2.49758	0.226499
972	2.50382	0.227647
973	2.50999	0.22868
974	2.51634	0.229994
975	2.52246	0.230369
976	2.52887	0.230265
977	2.53504	0.230764
978	2.54128	0.231433
979	2.54757	0.231847
980	2.55374	0.23267
981	2.56009	0.233664
982	2.56621	0.235137
983	2.57261	0.236964
984	2.57879	0.237759
985	2.58502	0.238418
986	2.59131	0.238682
987	2.59743	0.239689
988	2.60384	0.23987
989	2.61001	0.240324
990	2.6163	0.240455
991	2.62254	0.241399
992	2.62877	0.241895
993	2.63506	0.24218
994	2.64118	0.242374
995	2.64758	0.243834
996	2.65376	0.24434
997	2.65999	0.244905
998	2.66628	0.244711
999	2.67246	0.244339
1000	2.67875	0.244944
1001	2.68498	0.24377
1002	2.69133	0.244752
1003	2.69756	0.246232
1004	2.70374	0.246678
1005	2.71003	0.248247
1006	2.71626	0.249279
1007	2.72255	0.250304
1008	2.72873	0.250925
1009	2.73508	0.251578
1010	2.74125	0.252876
1011	2.74749	0.254688
1012	2.75378	0.256017
1013	2.7599	0.25736
1014	2.76635	0.258178
1015	2.77253	0.259001
1016	2.77871	0.259612
1017	2.78505	0.261221
1018	2.79123	0.262641
1019	2.79758	0.263851
1020	2.80376	0.264828
1021	2.8101	0.266205
1022	2.81628	0.266569
1023	2.82251	0.26634
1024	2.82875	0.266378
1025	2.83492	0.266725
1026	2.84132	0.267625
1027	2.84756	0.269003
1028	2.85379	0.269355
1029	2.86002	0.270436
1030	2.86626	0.269062
1031	2.87255	0.269755
1032	2.87867	0.270082
1033	2.88507	0.270101
1034	2.89131	0.27081
1035	2.89748	0.270766
1036	2.90377	0.271508
1037	2.91	0.27169
1038	2.91629	0.272488
1039	2.92247	0.273261
1040	2.92882	0.273108
1041	2.93505	0.273544
1042	2.94123	0.274803
1043	2.94752	0.27654
1044	2.95375	0.277071
1045	2.9601	0.277244
1046	2.96622	0.277844
1047	2.97256	0.278729
1048	2.9788	0.280046
1049	2.98497	0.280199
1050	2.99132	0.280759
1051	2.99744	0.281441
1052	3.00385	0.281876
1053	3.01002	0.283418
1054	3.01626	0.283164
1055	3.02255	0.284076
1056	3.02872	0.284933
1057	3.03507	0.286433
1058	3.04124	0.28756
1059	3.04759	0.289358
1060	3.05382	0.290084
1061	3.06	0.290354
1062	3.06629	0.289088
1063	3.07241	0.292638
1064	3.07882	0.29406
1065	3.08505	0.294373
1066	3.09128	0.294135
1067	3.09752	0.29489
1068	3.10375	0.295472
1069	3.11009	0.29654
1070	3.11616	0.297299
1071	3.12262	0.298862
1072	3.1288	0.299397
1073	3.13497	0.29968
1074	3.14126	0.300197
1075	3.1475	0.30033
1076	3.15379	0.299929
1077	3.15996	0.299815
1078	3.16631	0.300062
1079	3.17254	0.301308
1080	3.17872	0.301757
1081	3.18506	0.303771
1082	3.19124	0.304558
1083	3.19759	0.305828
1084	3.20377	0.306876
1085	3.21006	0.308742
1086	3.21629	0.309544
1087	3.22247	0.307119
1088	3.22881	0.305843
1089	3.23493	0.303941
1090	3.24133	0.300731
1091	3.24757	0.29927
1092	3.25374	0.296383
1093	3.26003	0.293491
1094	3.26621	0.289643
1095	3.27256	0.286705
1096	3.27874	0.284498
1097	3.28508	0.28127
1098	3.29131	0.279063
1099	3.29749	0.276079
1100	3.30378	0.274948
1101	3.3099	0.272751
1102	3.31636	0.270924
1103	3.32254	0.268634
1104	3.32883	0.266707
1105	3.33501	0.265041
1106	3.34124	0.26286
1107	3.34753	0.262796
1108	3.35371	0.261989
1109	3.36011	0.261406
1110	3.36629	0.262111
1111	3.37252	0.26245
1112	3.37875	0.26228
1113	3.38498	0.262743
1114	3.39127	0.263316
1115	3.39745	0.263572
1116	3.4038	0.263929
1117	3.41003	0.264226
1118	3.41627	0.264797
1119	3.42256	0.265868
1120	3.42873	0.266805
1121	3.43508	0.268218
1122	3.44126	0.269231
1123	3.44754	0.26993
1124	3.45378	0.270991
1125	3.45996	0.271539
1126	3.4663	0.272849
1127	3.47248	0.273812
1128	3.47883	0.274926
1129	3.48506	0.275716
1130	3.49124	0.276598
1131	3.49752	0.278043
1132	3.5037	0.278928
1133	3.51005	0.2806
1134	3.51623	0.281751
1135	3.52257	0.283152
1136	3.52881	0.28426
1137	3.53498	0.285445
1138	3.54133	0.28675
1139	3.54745	0.287069
1140	3.55385	0.288479
1141	3.56003	0.290026
1142	3.56632	0.290982
1143	3.57249	0.292034
1144	3.57873	0.292501
1145	3.58507	0.293477
1146	3.59119	0.294051
1147	3.5976	0.295534
1148	3.60378	0.29663
1149	3.61001	0.297772
1150	3.6163	0.298887
1151	3.62248	0.299676
1152	3.62877	0.300408
1153	3.635	0.301301
1154	3.64135	0.30242
1155	3.64758	0.303915
1156	3.65375	0.304868
1157	3.66005	0.306499
1158	3.66622	0.30761
1159	3.67257	0.309445
1160	3.67875	0.310511
1161	3.68504	0.311344
1162	3.69132	0.312323
1163	3.69745	0.312696
1164	3.70379	0.314455
1165	3.70997	0.316195
1166	3.71632	0.317991
1167	3.72255	0.319598
1168	3.72872	0.320639
1169	3.73502	0.322344
1170	3.74125	0.323569
1171	3.7476	0.325036
1172	3.75377	0.325492
1173	3.76006	0.326601
1174	3.76629	0.327878
1175	3.77247	0.328835
1176	3.77876	0.326556
1177	3.78494	0.327998
1178	3.79134	0.329871
1179	3.79752	0.331386
1180	3.80381	0.332108
1181	3.81004	0.333228
1182	3.81622	0.334505
1183	3.82257	0.336635
1184	3.82869	0.337959
1185	3.83509	0.33974
1186	3.84127	0.341136
1187	3.8475	0.342156
1188	3.85379	0.343175
1189	3.86002	0.343891
1190	3.86631	0.345294
1191	3.87249	0.346563
1192	3.87884	0.347895
1193	3.88501	0.349326
1194	3.89119	0.350165
1195	3.89754	0.351944
1196	3.90371	0.353354
1197	3.91006	0.354462
1198	3.91629	0.355269
1199	3.92253	0.355868
1200	3.92876	0.356803
1201	3.93499	0.357485
1202	3.94134	0.358629
1203	3.94746	0.358288
1204	3.95007	0.326672
1205	3.95624	0.325896
1206	3.96253	0.330513
1207	3.96865	0.33405
1208	3.97511	0.33624
1209	3.98129	0.338133
1210	3.98752	0.340593
1211	3.99381	0.342465
1212	3.99999	0.343217
1213	4.00628	0.345425
1214	4.01246	0.347603
1215	4.0188	0.346405
1216	4.02504	0.346496
1217	4.03121	0.346926
1218	4.03756	0.348458
1219	4.04374	0.34976
1220	4.05008	0.351886
1221	4.05626	0.353827
1222	4.06255	0.356031
1223	4.06878	0.357987
1224	4.07496	0.359961
1225	4.08131	0.362314
1226	4.08743	0.364442
1227	4.09383	0.366773
1228	4.10001	0.3687
1229	4.1063	0.368525
1230	4.11253	0.370198
1231	4.11871	0.37213
1232	4.12505	0.374265
1233	4.13123	0.373621
1234	4.13758	0.362826
1235	4.14381	0.365726
1236	4.14761	0.319673
1237	4.15378	0.327403
1238	4.16002	0.334166
1239	4.16631	0.33952
1240	4.17248	0.343999
1241	4.17883	0.348065
1242	4.18495	0.350987
1243	4.19135	0.354036
1244	4.19753	0.356145
1245	4.20376	0.357733
1246	4.21	0.358258
1247	4.21623	0.358848
1248	4.22258	0.36037
1249	4.22875	0.361657
1250	4.23504	0.363725
1251	4.24128	0.365126
1252	4.24745	0.366466
1253	4.2538	0.366888
1254	4.25997	0.36664
1255	4.26632	0.366016
1256	4.2725	0.36614
1257	4.27879	0.366207
1258	4.28502	0.366797
1259	4.29126	0.368725
1260	4.29755	0.370799
1261	4.30372	0.37204
1262	4.31007	0.372837
1263	4.3163	0.373476
1264	4.32248	0.374091
1265	4.32883	0.374526
1266	4.335	0.373621
1267	4.34129	0.373887
1268	4.34747	0.373337
1269	4.35382	0.373198
1270	4.36005	0.371908
1271	4.36623	0.370601
1272	4.37252	0.372073
1273	4.37864	0.373039
1274	4.38504	0.365017
1275	4.39127	0.366683
1276	4.39751	0.369144
1277	4.4038	0.371376
1278	4.40997	0.372622
1279	4.41632	0.373134
1280	4.42244	0.373869
1281	4.42884	0.374949
1282	4.43508	0.376109
1283	4.44125	0.377298
1284	4.44754	0.379238
1285	4.45247	0.380179
1286	4.45395	-0.009112
Specimen: 2
Number of data points: 1065
Maximum Load point: 1059 Maximum Load: 0.33160 kN
Maximum Extension point: 1065 Maximum Extension: 3.68538 mm
___________________________________________________
1	0	-5.4e-05
2	0.000397	8.6e-05
3	0.002323	-4.4e-05
4	0.003797	1.3e-05
5	0.005043	7.2e-05
6	0.00629	7.7e-05
7	0.00748	2.7e-05
8	0.008727	5.2e-05
9	0.009973	6.2e-05
10	0.011277	-6.1e-05
11	0.01258	-1e-05
12	0.01377	6.9e-05
13	0.015017	-1.2e-05
14	0.01632	-9e-06
15	0.017567	7.2e-05
16	0.018757	4.5e-05
17	0.020003	7.6e-05
18	0.021193	7.6e-05
19	0.022497	1.7e-05
20	0.0238	-5.2e-05
21	0.025047	-1.2e-05
22	0.026293	8e-05
23	0.027597	2.8e-05
24	0.028787	7e-06
25	0.029977	6.9e-05
26	0.031223	1.8e-05
27	0.032527	0.000102
28	0.03383	4.1e-05
29	0.035077	8.5e-05
30	0.036323	-1.4e-05
31	0.03757	4.5e-05
32	0.038873	2e-06
33	0.040063	-6.2e-05
34	0.041253	-3e-06
35	0.0425	8.5e-05
36	0.043747	7.4e-05
37	0.045107	0.000101
38	0.046297	3e-05
39	0.0476	5.3e-05
40	0.048847	1e-06
41	0.050093	-2.8e-05
42	0.051283	3.2e-05
43	0.05253	-2.4e-05
44	0.05372	-1e-05
45	0.055023	2.5e-05
46	0.056327	5.2e-05
47	0.057573	0.000116
48	0.05882	5.5e-05
49	0.060123	5.8e-05
50	0.061257	-4.8e-05
51	0.062503	5e-05
52	0.06375	0
53	0.064997	-5e-06
54	0.0663	-6.1e-05
55	0.067547	5e-05
56	0.068793	2.1e-05
57	0.070097	6e-05
58	0.071343	4.2e-05
59	0.072533	1.7e-05
60	0.07378	-5.4e-05
61	0.07497	-2e-06
62	0.076273	1.1e-05
63	0.077577	6e-06
64	0.078823	3e-06
65	0.08007	6e-05
66	0.081373	3.2e-05
67	0.082563	5.6e-05
68	0.083753	5.1e-05
69	0.085	-1.2e-05
70	0.086247	-5.8e-05
71	0.08755	-1.3e-05
72	0.088853	3e-06
73	0.090043	-2.9e-05
74	0.091347	-2.3e-05
75	0.092593	8.1e-05
76	0.093783	8.9e-05
77	0.09503	3.7e-05
78	0.096277	2e-05
79	0.097523	1e-05
80	0.09877	4.3e-05
81	0.100073	3.5e-05
82	0.10132	-9e-06
83	0.102567	-2.4e-05
84	0.103813	-5.4e-05
85	0.105003	1.7e-05
86	0.10625	2.5e-05
87	0.10744	6.5e-05
88	0.1088	2.5e-05
89	0.110103	5.5e-05
90	0.111293	2.8e-05
91	0.112597	-1.5e-05
92	0.113843	1.1e-05
93	0.115033	1.2e-05
94	0.116223	-4.8e-05
95	0.117527	4.7e-05
96	0.118717	0.000112
97	0.12002	2e-05
98	0.121323	6.9e-05
99	0.12257	6.2e-05
100	0.123873	5.3e-05
101	0.12512	3.7e-05
102	0.126253	2.3e-05
103	0.1275	1.7e-05
104	0.12869	-3e-06
105	0.129993	5.5e-05
106	0.131297	3e-06
107	0.132543	0.000122
108	0.13379	3.2e-05
109	0.135037	9.1e-05
110	0.13634	-3.7e-05
111	0.137473	3.1e-05
112	0.138777	6.1e-05
113	0.139967	-5.9e-05
114	0.14127	2.5e-05
115	0.142573	8.5e-05
116	0.14382	0.000101
117	0.145123	7.6e-05
118	0.14637	3.6e-05
119	0.147503	3.6e-05
120	0.14875	-4.4e-05
121	0.149997	4.8e-05
122	0.151243	2.8e-05
123	0.152547	-3e-05
124	0.153793	-3e-06
125	0.15504	5.3e-05
126	0.156343	4.6e-05
127	0.15759	-3e-06
128	0.158723	5.7e-05
129	0.15997	0.000131
130	0.16116	1.3e-05
131	0.16252	1.8e-05
132	0.163823	3.1e-05
133	0.16507	-1.9e-05
134	0.166373	7e-06
135	0.16762	5.7e-05
136	0.16881	0.000122
137	0.17	0.000102
138	0.171247	7.5e-05
139	0.172493	7e-05
140	0.173797	2.1e-05
141	0.1751	8e-05
142	0.17629	1.6e-05
143	0.177593	6.9e-05
144	0.178897	0.000618
145	0.18003	0.001483
146	0.181277	0.002398
147	0.182467	0.003395
148	0.18377	0.004499
149	0.185073	0.005487
150	0.18632	0.006278
151	0.187567	0.007031
152	0.18887	0.007607
153	0.19006	0.008158
154	0.19125	0.00867
155	0.192497	0.009205
156	0.193743	0.009707
157	0.195047	0.010291
158	0.19635	0.010757
159	0.19754	0.011202
160	0.198843	0.011616
161	0.20009	0.012052
162	0.201337	0.012423
163	0.202527	0.012857
164	0.203773	0.013355
165	0.20502	0.013768
166	0.206323	0.014178
167	0.20757	0.014628
168	0.208817	0.014995
169	0.21012	0.015363
170	0.211367	0.015716
171	0.2125	0.016007
172	0.213747	0.016376
173	0.214937	0.016653
174	0.216297	0.017019
175	0.217543	0.017441
176	0.21879	0.017833
177	0.220093	0.018129
178	0.221397	0.018498
179	0.222587	0.018706
180	0.223777	0.019024
181	0.225023	0.019279
182	0.226213	0.019579
183	0.227517	0.019978
184	0.22882	0.020301
185	0.230067	0.020571
186	0.231313	0.020948
187	0.232617	0.021139
188	0.233807	0.021417
189	0.234997	0.02166
190	0.2363	0.021921
191	0.23749	0.022145
192	0.238793	0.022537
193	0.24004	0.022744
194	0.241287	0.022994
195	0.242533	0.023312
196	0.243837	0.023499
197	0.245027	0.023639
198	0.246273	0.023898
199	0.247463	0.024136
200	0.248767	0.024351
201	0.25007	0.024601
202	0.25126	0.024799
203	0.252564	0.025115
204	0.253867	0.025382
205	0.255057	0.025671
206	0.256247	0.025863
207	0.257493	0.026197
208	0.258683	0.02641
209	0.260044	0.026706
210	0.26129	0.026831
211	0.262537	0.027081
212	0.26384	0.027468
213	0.265143	0.027693
214	0.266277	0.027824
215	0.267523	0.028131
216	0.26877	0.028549
217	0.270017	0.028657
218	0.27132	0.029058
219	0.272567	0.02935
220	0.273813	0.029853
221	0.27506	0.030385
222	0.276363	0.030894
223	0.277497	0.031335
224	0.278744	0.031871
225	0.27999	0.032389
226	0.281293	0.032971
227	0.28254	0.033457
228	0.283787	0.033926
229	0.28509	0.034484
230	0.286393	0.03503
231	0.287584	0.035435
232	0.288774	0.035732
233	0.29002	0.036284
234	0.29121	0.036688
235	0.29257	0.03731
236	0.293873	0.037747
237	0.295063	0.038213
238	0.29631	0.038733
239	0.297614	0.039251
240	0.298804	0.039624
241	0.299994	0.04001
242	0.301297	0.040509
243	0.302487	0.040974
244	0.30379	0.041439
245	0.305037	0.041882
246	0.30634	0.04232
247	0.307587	0.042758
248	0.308834	0.043218
249	0.310024	0.043652
250	0.31127	0.043984
251	0.31246	0.04438
252	0.313764	0.044797
253	0.315067	0.045246
254	0.316314	0.045631
255	0.317617	0.046134
256	0.318864	0.046597
257	0.320054	0.046939
258	0.321244	0.047403
259	0.322547	0.047825
260	0.323737	0.04814
261	0.32504	0.04861
262	0.326344	0.049029
263	0.32759	0.04934
264	0.328837	0.049744
265	0.330084	0.050117
266	0.331274	0.050452
267	0.33252	0.050909
268	0.33371	0.051271
269	0.335014	0.05161
270	0.336317	0.0519
271	0.337564	0.052228
272	0.33881	0.052635
273	0.340114	0.05293
274	0.34136	0.053305
275	0.342494	0.053617
276	0.34374	0.053949
277	0.34493	0.054287
278	0.34629	0.054643
279	0.347594	0.054891
280	0.348784	0.055114
281	0.350087	0.055432
282	0.351334	0.055669
283	0.352524	0.055848
284	0.353714	0.05606
285	0.355017	0.056465
286	0.356264	0.056546
287	0.357567	0.056691
288	0.358814	0.05665
289	0.36006	0.056602
290	0.361364	0.056807
291	0.36261	0.056946
292	0.363744	0.057015
293	0.36499	0.057397
294	0.36618	0.05749
295	0.36754	0.057882
296	0.368844	0.058108
297	0.37009	0.058295
298	0.371337	0.058432
299	0.372584	0.05862
300	0.37383	0.05871
301	0.37502	0.058754
302	0.376267	0.058781
303	0.377457	0.057974
304	0.378817	0.05565
305	0.380064	0.055189
306	0.38131	0.055124
307	0.382614	0.054856
308	0.38386	0.054427
309	0.38505	0.053983
310	0.386297	0.05037
311	0.387487	0.048409
312	0.38879	0.048345
313	0.390094	0.048248
314	0.39134	0.048045
315	0.392587	0.047793
316	0.393834	0.047499
317	0.39508	0.047284
318	0.39627	0.047066
319	0.397574	0.046944
320	0.398707	0.046637
321	0.400067	0.0467
322	0.40137	0.046448
323	0.40256	0.046156
324	0.403807	0.045982
325	0.40511	0.045787
326	0.4063	0.045555
327	0.40749	0.045454
328	0.408737	0.045145
329	0.409984	0.044919
330	0.411287	0.04478
331	0.412534	0.044659
332	0.41378	0.044697
333	0.415084	0.044864
334	0.41633	0.044832
335	0.41752	0.044841
336	0.418767	0.044822
337	0.419957	0.044626
338	0.42126	0.04446
339	0.422564	0.044175
340	0.423754	0.043935
341	0.425057	0.043744
342	0.42636	0.043608
343	0.427607	0.043537
344	0.428797	0.043676
345	0.429987	0.044041
346	0.431177	0.044132
347	0.432537	0.044542
348	0.43384	0.044606
349	0.43503	0.044653
350	0.436334	0.044676
351	0.43758	0.044547
352	0.438827	0.044314
353	0.440017	0.044277
354	0.441264	0.044155
355	0.44251	0.044088
356	0.443814	0.044024
357	0.445004	0.043925
358	0.446307	0.043874
359	0.447554	0.043924
360	0.448857	0.043865
361	0.450047	0.043766
362	0.451237	0.043819
363	0.452484	0.04384
364	0.453787	0.044101
365	0.45509	0.044351
366	0.456337	0.044368
367	0.457584	0.044379
368	0.458887	0.044287
369	0.460077	0.044192
370	0.46121	0.043989
371	0.462514	0.043724
372	0.463704	0.04314
373	0.465064	0.042477
374	0.46631	0.04145
375	0.467557	0.04094
376	0.468804	0.040491
377	0.470107	0.040414
378	0.471297	0.040211
379	0.472487	0.039681
380	0.473734	0.039242
381	0.47498	0.038803
382	0.47634	0.038632
383	0.477587	0.038086
384	0.478834	0.037632
385	0.48008	0.037075
386	0.481384	0.036967
387	0.482517	0.036787
388	0.483764	0.036487
389	0.48501	0.036427
390	0.486257	0.036436
391	0.48756	0.036475
392	0.48875	0.036244
393	0.490054	0.036095
394	0.491357	0.03591
395	0.492604	0.035802
396	0.493794	0.035827
397	0.49504	0.035838
398	0.49623	0.035855
399	0.497534	0.036167
400	0.498837	0.036225
401	0.500027	0.036253
402	0.50133	0.036347
403	0.502577	0.036491
404	0.503824	0.03644
405	0.505014	0.03605
406	0.50626	0.035709
407	0.507507	0.035062
408	0.50881	0.034801
409	0.510114	0.035013
410	0.51136	0.035116
411	0.512607	0.035483
412	0.513854	0.03584
413	0.514987	0.03614
414	0.516234	0.03639
415	0.517424	0.036668
416	0.518784	0.036898
417	0.520087	0.036898
418	0.521334	0.036704
419	0.52258	0.036579
420	0.523827	0.036542
421	0.525074	0.036729
422	0.526264	0.037312
423	0.52751	0.038267
424	0.528757	0.039144
425	0.53006	0.040281
426	0.531364	0.041176
427	0.532554	0.042093
428	0.533857	0.043042
429	0.535104	0.044046
430	0.536294	0.044798
431	0.537484	0.045585
432	0.538787	0.046413
433	0.539977	0.047037
434	0.541337	0.047886
435	0.542527	0.04856
436	0.543774	0.04921
437	0.545077	0.049707
438	0.546324	0.05011
439	0.547514	0.050301
440	0.54876	0.050725
441	0.54995	0.051262
442	0.55131	0.051925
443	0.552614	0.05231
444	0.553804	0.052754
445	0.555107	0.053279
446	0.556354	0.05376
447	0.557544	0.054336
448	0.558734	0.054862
449	0.560037	0.055498
450	0.561227	0.055993
451	0.562587	0.056725
452	0.563834	0.057421
453	0.56508	0.057891
454	0.566327	0.058551
455	0.56763	0.059111
456	0.568764	0.059698
457	0.57001	0.060177
458	0.5712	0.060628
459	0.572504	0.061244
460	0.573807	0.061719
461	0.575054	0.062156
462	0.576357	0.062597
463	0.577604	0.063088
464	0.57885	0.063456
465	0.579984	0.063655
466	0.58123	0.064029
467	0.582477	0.064488
468	0.58378	0.064823
469	0.585084	0.065225
470	0.58633	0.065433
471	0.587577	0.06579
472	0.58888	0.066124
473	0.59007	0.066355
474	0.59126	0.066649
475	0.592507	0.06705
476	0.593754	0.067356
477	0.595057	0.067808
478	0.596304	0.068046
479	0.59755	0.068389
480	0.598854	0.068601
481	0.6001	0.069017
482	0.601234	0.069231
483	0.60248	0.069684
484	0.60367	0.070051
485	0.60503	0.07058
486	0.606334	0.07101
487	0.60758	0.071342
488	0.608884	0.071537
489	0.61013	0.071834
490	0.61132	0.072063
491	0.61251	0.072337
492	0.613757	0.072716
493	0.615004	0.072971
494	0.616307	0.073344
495	0.61761	0.073606
496	0.6188	0.073839
497	0.620104	0.074146
498	0.62135	0.074439
499	0.62254	0.074722
500	0.623787	0.075002
501	0.624977	0.075321
502	0.62628	0.075684
503	0.627584	0.076059
504	0.62883	0.076378
505	0.630077	0.076778
506	0.631324	0.077057
507	0.63257	0.077375
508	0.63376	0.077672
509	0.635007	0.077965
510	0.636197	0.078092
511	0.6375	0.078629
512	0.638804	0.07895
513	0.64005	0.079152
514	0.641354	0.079492
515	0.6426	0.079862
516	0.643847	0.080101
517	0.645037	0.080261
518	0.646284	0.080548
519	0.64753	0.080754
520	0.648834	0.081038
521	0.65008	0.081314
522	0.651327	0.081557
523	0.652574	0.081849
524	0.65382	0.081964
525	0.65501	0.08215
526	0.656257	0.082321
527	0.657447	0.082375
528	0.658807	0.082072
529	0.66011	0.081912
530	0.6613	0.081816
531	0.662604	0.081931
532	0.66385	0.082095
533	0.665097	0.082142
534	0.66623	0.082149
535	0.667534	0.082408
536	0.668667	0.082492
537	0.670027	0.082773
538	0.67133	0.082817
539	0.672577	0.082817
540	0.673824	0.082694
541	0.675127	0.082595
542	0.676317	0.082439
543	0.677507	0.082221
544	0.67881	0.082378
545	0.68	0.082753
546	0.681304	0.082968
547	0.68255	0.083246
548	0.683797	0.083303
549	0.685044	0.083587
550	0.686347	0.08372
551	0.687537	0.083945
552	0.688784	0.084198
553	0.689974	0.084619
554	0.691277	0.084991
555	0.69258	0.085232
556	0.69377	0.085332
557	0.695074	0.085469
558	0.696377	0.085626
559	0.697567	0.085745
560	0.698757	0.085812
561	0.70006	0.085978
562	0.701194	0.086133
563	0.702554	0.086431
564	0.7038	0.086615
565	0.705047	0.086796
566	0.70635	0.087036
567	0.707597	0.087284
568	0.708787	0.087425
569	0.709977	0.087643
570	0.711224	0.087861
571	0.71247	0.087989
572	0.71383	0.088437
573	0.715077	0.08863
574	0.716324	0.088787
575	0.71757	0.089096
576	0.718874	0.089423
577	0.720007	0.089622
578	0.721254	0.089709
579	0.7225	0.089952
580	0.723747	0.090003
581	0.725051	0.09034
582	0.726297	0.090519
583	0.7276	0.090859
584	0.728904	0.091113
585	0.730094	0.091313
586	0.731284	0.091551
587	0.73253	0.091938
588	0.73372	0.091977
589	0.73508	0.092477
590	0.736327	0.092619
591	0.737574	0.092781
592	0.743751	0.094063
593	0.750097	0.094941
594	0.756274	0.095938
595	0.762564	0.096737
596	0.768797	0.097975
597	0.774974	0.098611
598	0.781321	0.099405
599	0.787497	0.099916
600	0.793844	0.100432
601	0.800077	0.101162
602	0.806254	0.102033
603	0.812544	0.102579
604	0.818777	0.103063
605	0.825124	0.103669
606	0.831244	0.104412
607	0.837591	0.104552
608	0.843824	0.105435
609	0.850001	0.105636
610	0.856291	0.106077
611	0.862467	0.106902
612	0.86887	0.107565
613	0.875047	0.107927
614	0.881337	0.107711
615	0.887571	0.107615
616	0.893747	0.107634
617	0.900037	0.107641
618	0.906214	0.108424
619	0.912617	0.109527
620	0.918794	0.108949
621	0.925027	0.108301
622	0.931317	0.108285
623	0.937494	0.107076
624	0.943784	0.106828
625	0.950017	0.106954
626	0.956364	0.106099
627	0.962541	0.106429
628	0.968774	0.106438
629	0.975064	0.107038
630	0.981241	0.107594
631	0.987587	0.108131
632	0.993764	0.109256
633	1.00005	0.109617
634	1.00634	0.110209
635	1.01252	0.110284
636	1.01881	0.110572
637	1.02493	0.111161
638	1.03139	0.111684
639	1.03757	0.112865
640	1.0438	0.112815
641	1.05003	0.112951
642	1.05627	0.113189
643	1.06261	0.112986
644	1.06873	0.113698
645	1.07508	0.112867
646	1.08137	0.11426
647	1.08755	0.114023
648	1.09384	0.114694
649	1.09996	0.115125
650	1.10636	0.115078
651	1.11254	0.116064
652	1.11883	0.116482
653	1.125	0.116995
654	1.13124	0.116649
655	1.13758	0.116802
656	1.1437	0.117079
657	1.15011	0.116644
658	1.15634	0.117662
659	1.16252	0.117508
660	1.16881	0.117285
661	1.17504	0.117373
662	1.18133	0.11818
663	1.18751	0.118937
664	1.19385	0.119639
665	1.20009	0.120132
666	1.20626	0.120375
667	1.21255	0.120186
668	1.21879	0.119867
669	1.22508	0.119307
670	1.23125	0.119853
671	1.23754	0.119499
672	1.24383	0.120109
673	1.25001	0.120102
674	1.25636	0.120203
675	1.26248	0.120226
676	1.26888	0.119675
677	1.27506	0.119495
678	1.28129	0.119247
679	1.28758	0.119916
680	1.29376	0.119864
681	1.3001	0.119826
682	1.30628	0.120189
683	1.31257	0.120447
684	1.3188	0.12112
685	1.32504	0.12189
686	1.33127	0.121735
687	1.33745	0.122715
[truncated: 7,404 more rows]

## Sheet: S6_Gr2 raw data
Gr2
Specimen: 1
Number of data points: 809
Maximum Load point: 807 Maximum Load: 0.44954 kN
Maximum Extension point: 809 Maximum Extension: 2.79747 mm
___________________________________________________
1	0	4e-05
2	0.000397	9.3e-05
3	0.001757	-4.3e-05
4	0.003343	-2.7e-05
5	0.004817	-2e-06
6	0.00612	-5.6e-05
7	0.007367	6.3e-05
8	0.00867	2.8e-05
9	0.009917	8.2e-05
10	0.011107	0.000101
11	0.01241	6e-05
12	0.0136	6.2e-05
13	0.014903	-1e-05
14	0.01615	2.4e-05
15	0.017397	-1e-06
16	0.0187	-2.7e-05
17	0.019947	-2.1e-05
18	0.021193	9.2e-05
19	0.022383	1e-05
20	0.023687	2.8e-05
21	0.024877	8e-06
22	0.02618	5.9e-05
23	0.027483	-3.7e-05
24	0.028673	-5.4e-05
25	0.029977	-1.8e-05
26	0.03128	-4.7e-05
27	0.03247	1.9e-05
28	0.03366	0.000153
29	0.034907	3.4e-05
30	0.036153	-2.1e-05
31	0.037457	6e-05
32	0.038703	5.2e-05
33	0.040007	3.3e-05
34	0.041253	-9e-05
35	0.0425	-4.5e-05
36	0.04369	-2.7e-05
37	0.044937	1.7e-05
38	0.046127	9.8e-05
39	0.04743	9.2e-05
40	0.048733	9.9e-05
41	0.049923	3.8e-05
42	0.051227	0.000118
43	0.05253	-1.8e-05
44	0.05372	-1.5e-05
45	0.05491	-3.1e-05
46	0.056157	-3.2e-05
47	0.057403	-3.3e-05
48	0.058707	2.5e-05
49	0.059953	3.8e-05
50	0.061257	0.000113
51	0.062503	0.000108
52	0.06375	7e-05
53	0.06494	-1.7e-05
54	0.06613	5e-05
55	0.067433	-5.1e-05
56	0.06868	-8.9e-05
57	0.069983	-4.1e-05
58	0.07123	-3e-06
59	0.072477	7.4e-05
60	0.07378	6e-05
61	0.075027	6e-05
62	0.07616	8.7e-05
63	0.077407	-4.1e-05
64	0.078653	-5e-05
65	0.079957	9e-06
66	0.08126	1.4e-05
67	0.08245	2e-06
68	0.083753	9.7e-05
69	0.085	3.2e-05
70	0.086247	8.6e-05
71	0.087437	6.7e-05
72	0.088683	4.5e-05
73	0.089873	-0.000116
74	0.091177	-3.2e-05
75	0.09248	-2.3e-05
76	0.093727	-6.4e-05
77	0.094973	-5e-06
78	0.096277	7.8e-05
79	0.097467	7e-06
80	0.098657	6.7e-05
81	0.099903	6.7e-05
82	0.10115	7.2e-05
83	0.10251	-8e-06
84	0.1037	1.3e-05
85	0.105003	-3e-05
86	0.10625	1.3e-05
87	0.107497	5e-06
88	0.108687	4.3e-05
89	0.109933	1.8e-05
90	0.111123	0.000295
91	0.112427	0.000956
92	0.113787	0.001493
93	0.114977	0.001788
94	0.11628	0.00225
95	0.117527	0.002606
96	0.118717	0.002945
97	0.119963	0.003296
98	0.12121	0.00362
99	0.1224	0.003789
100	0.123703	0.003979
101	0.125007	0.004104
102	0.126253	0.004225
103	0.1275	0.004285
104	0.128747	0.004292
105	0.129937	0.004387
106	0.131183	0.004488
107	0.13243	0.004579
108	0.133677	0.004693
109	0.13498	0.004753
110	0.136227	0.004818
111	0.137473	0.004784
112	0.138777	0.004967
113	0.140023	0.004999
114	0.141157	0.005071
115	0.142403	0.005122
116	0.14365	0.005257
117	0.144953	0.00535
118	0.146257	0.005482
119	0.147503	0.005515
120	0.14875	0.005543
121	0.150053	0.005549
122	0.151243	0.005638
123	0.152433	0.005588
124	0.15368	0.005722
125	0.154927	0.005693
126	0.156173	0.005866
127	0.157477	0.006028
128	0.158723	0.006252
129	0.160027	0.006441
130	0.161273	0.006544
131	0.162407	0.006778
132	0.163653	0.007081
133	0.1649	0.007399
134	0.166203	0.007814
135	0.167507	0.008108
136	0.168697	0.00844
137	0.17	0.008786
138	0.171303	0.009277
139	0.172493	0.009683
140	0.173683	0.01005
141	0.17493	0.010441
142	0.17612	0.010717
143	0.177423	0.011136
144	0.178727	0.011557
145	0.179973	0.011891
146	0.181277	0.012481
147	0.182523	0.012821
148	0.183657	0.013199
149	0.184903	0.013533
150	0.18615	0.013905
151	0.187453	0.014137
152	0.188757	0.014431
153	0.190003	0.014544
154	0.19125	0.014692
155	0.192497	0.014753
156	0.1938	0.014737
157	0.194933	0.014887
158	0.19618	0.014968
159	0.19737	0.014965
160	0.198673	0.015182
161	0.200033	0.015372
162	0.201223	0.015375
163	0.20247	0.015393
164	0.203773	0.01549
165	0.204963	0.015501
166	0.206153	0.015539
167	0.207457	0.015527
168	0.208647	0.015564
169	0.20995	0.01578
170	0.211253	0.015913
171	0.2125	0.015918
172	0.213747	0.015938
173	0.21505	0.015824
174	0.216183	0.015768
175	0.21743	0.015844
176	0.21862	0.015893
177	0.219923	0.016131
178	0.221227	0.016427
179	0.222473	0.016582
180	0.223777	0.016618
181	0.225023	0.016707
182	0.22627	0.016835
183	0.227403	0.016933
184	0.228707	0.01692
185	0.229897	0.016903
186	0.2312	0.017187
187	0.232503	0.017282
188	0.233693	0.017491
189	0.234997	0.017662
190	0.2363	0.017709
191	0.23749	0.017872
192	0.23868	0.01805
193	0.239927	0.017996
194	0.241173	0.018175
195	0.242477	0.018319
196	0.243723	0.018428
197	0.24497	0.018593
198	0.246273	0.018832
199	0.24752	0.01881
200	0.24871	0.01881
201	0.2499	0.019043
202	0.25109	0.01913
203	0.25245	0.019469
204	0.253753	0.019547
205	0.254943	0.019655
206	0.256303	0.019795
207	0.25755	0.020022
208	0.25874	0.020212
209	0.25993	0.020371
210	0.261177	0.020555
211	0.262423	0.020667
212	0.263727	0.02096
213	0.264973	0.021075
214	0.26622	0.021172
215	0.267523	0.021344
216	0.26877	0.021237
217	0.26996	0.021261
218	0.27115	0.021486
219	0.272397	0.021517
220	0.2737	0.021663
221	0.274947	0.021889
222	0.276193	0.022025
223	0.27744	0.022212
224	0.278744	0.022305
225	0.280047	0.022581
226	0.28118	0.022651
227	0.282427	0.022972
228	0.283617	0.023052
229	0.28492	0.023341
230	0.28628	0.023622
231	0.28747	0.023756
232	0.288717	0.02402
233	0.29002	0.024179
234	0.291267	0.024264
235	0.2924	0.024436
236	0.293703	0.02471
237	0.294894	0.02471
238	0.296197	0.024897
239	0.297444	0.024863
240	0.29869	0.024725
241	0.299937	0.024817
242	0.301297	0.024903
243	0.302487	0.024653
244	0.303677	0.024731
245	0.304924	0.024729
246	0.30617	0.024579
247	0.307474	0.024505
248	0.30872	0.024542
249	0.310024	0.024601
250	0.31127	0.02469
251	0.312517	0.024921
252	0.313707	0.025001
253	0.314897	0.025181
254	0.316144	0.025222
255	0.317504	0.025516
256	0.31875	0.025712
257	0.319997	0.02593
258	0.321244	0.02607
259	0.322547	0.026213
260	0.323737	0.026197
261	0.324927	0.0263
262	0.326174	0.026461
263	0.327364	0.026424
264	0.328724	0.026799
265	0.32997	0.027031
266	0.331217	0.027069
267	0.332464	0.027343
268	0.333767	0.027675
269	0.334957	0.027888
270	0.336204	0.028199
271	0.33745	0.028467
272	0.338697	0.028698
273	0.34	0.028835
274	0.341247	0.029022
275	0.342494	0.029213
276	0.34374	0.029272
277	0.344987	0.029374
278	0.346177	0.029465
279	0.347424	0.029652
280	0.348614	0.029898
281	0.349974	0.030342
282	0.351277	0.030433
283	0.352467	0.030506
284	0.353714	0.030703
285	0.355017	0.030919
286	0.356207	0.031056
287	0.357454	0.031224
288	0.3587	0.031345
289	0.35989	0.031341
290	0.361194	0.031419
291	0.362497	0.031519
292	0.363687	0.031696
293	0.36499	0.032094
294	0.366294	0.032679
295	0.367427	0.032995
296	0.368674	0.033551
297	0.36992	0.034061
298	0.371167	0.034582
299	0.37247	0.035082
300	0.373717	0.035464
301	0.37502	0.035847
302	0.376267	0.03625
303	0.377514	0.036417
304	0.378704	0.036687
305	0.37995	0.037135
306	0.38114	0.037451
307	0.382444	0.03802
308	0.383747	0.038337
309	0.384937	0.038698
310	0.38624	0.03906
311	0.387544	0.039364
312	0.388677	0.039563
313	0.389924	0.0398
314	0.39117	0.040011
315	0.392417	0.040233
316	0.39372	0.04056
317	0.394967	0.04079
318	0.396214	0.040984
319	0.397517	0.041263
320	0.398764	0.04146
321	0.399897	0.041606
322	0.4012	0.041826
323	0.40239	0.041914
324	0.403694	0.042239
325	0.404997	0.042422
326	0.406187	0.042611
327	0.40749	0.042849
328	0.408737	0.043123
329	0.409984	0.043279
330	0.411174	0.04349
331	0.41242	0.043792
332	0.413667	0.043967
333	0.41497	0.044203
334	0.416217	0.044371
335	0.417464	0.044595
336	0.418767	0.04484
337	0.420014	0.045081
338	0.421204	0.045216
339	0.422394	0.045469
340	0.42364	0.045766
341	0.424944	0.04602
342	0.426247	0.046305
343	0.427494	0.046365
344	0.42874	0.046624
345	0.429987	0.046841
346	0.431234	0.047128
347	0.432424	0.047328
348	0.43367	0.047755
349	0.43486	0.048035
350	0.43622	0.048341
351	0.437524	0.04874
352	0.438714	0.048856
353	0.440017	0.049121
354	0.441264	0.049346
355	0.44251	0.049464
356	0.443644	0.049701
357	0.444947	0.05005
358	0.446137	0.05026
359	0.447497	0.050565
360	0.448744	0.05072
361	0.44999	0.050893
362	0.451237	0.051091
363	0.45254	0.051199
364	0.453674	0.051333
365	0.454977	0.051567
366	0.45611	0.051766
367	0.45747	0.052004
368	0.458717	0.052245
369	0.459964	0.052351
370	0.461267	0.052623
371	0.462514	0.05287
372	0.46376	0.052865
373	0.464894	0.053022
374	0.466197	0.053318
375	0.467387	0.053348
376	0.46869	0.053723
377	0.469994	0.05386
378	0.47124	0.054068
379	0.472544	0.05428
380	0.47379	0.054448
381	0.47498	0.054507
382	0.47617	0.05466
383	0.477417	0.05474
384	0.478664	0.055062
385	0.479967	0.055287
386	0.481214	0.055429
387	0.48246	0.055733
388	0.483764	0.056037
389	0.48501	0.05621
390	0.4862	0.056347
391	0.48739	0.056611
392	0.48858	0.056829
393	0.48994	0.057166
394	0.491244	0.05727
395	0.49249	0.057505
396	0.493737	0.057701
397	0.49504	0.057966
398	0.49623	0.058108
399	0.49742	0.058193
400	0.498667	0.058539
401	0.499914	0.058665
402	0.501217	0.058942
403	0.502464	0.059072
404	0.503767	0.059178
405	0.505014	0.059389
406	0.50626	0.059577
407	0.50745	0.059751
408	0.508697	0.059878
409	0.509944	0.060121
410	0.51119	0.060227
411	0.512494	0.060398
412	0.513684	0.060351
413	0.51493	0.060474
414	0.516234	0.060484
415	0.51748	0.060598
416	0.51867	0.060618
417	0.519917	0.060788
418	0.521107	0.060943
419	0.522467	0.061201
420	0.52377	0.061322
421	0.52496	0.061406
422	0.526207	0.061568
423	0.52751	0.061611
424	0.528757	0.061808
425	0.52989	0.061971
426	0.531194	0.062241
427	0.532384	0.062372
428	0.533687	0.062618
429	0.534934	0.06278
430	0.53618	0.062943
431	0.537484	0.06319
432	0.538787	0.063359
433	0.539977	0.063428
434	0.541167	0.063725
435	0.542414	0.064029
436	0.54366	0.064247
437	0.544964	0.064656
438	0.54621	0.064846
439	0.547457	0.065084
440	0.54876	0.065347
441	0.550007	0.065664
442	0.551197	0.065785
443	0.552444	0.066113
444	0.553634	0.06638
445	0.554937	0.066683
446	0.55624	0.066972
447	0.557487	0.067108
448	0.558734	0.067326
449	0.560037	0.067581
450	0.56627	0.068799
451	0.572447	0.069627
452	0.578737	0.070894
453	0.584914	0.072124
454	0.59126	0.073046
455	0.59738	0.073864
456	0.603727	0.074989
457	0.610017	0.075972
458	0.616137	0.076144
459	0.622484	0.075711
460	0.62866	0.077895
461	0.635007	0.078657
462	0.641184	0.079801
463	0.647474	0.080812
464	0.653764	0.081257
465	0.659884	0.081431
466	0.666287	0.081521
467	0.67235	0.08267
468	0.67881	0.083317
469	0.68493	0.084368
470	0.69122	0.08407
471	0.697454	0.084293
472	0.703687	0.085487
473	0.709977	0.086215
474	0.716154	0.086798
475	0.7225	0.087809
476	0.728734	0.088193
477	0.73491	0.089043
478	0.7412	0.089231
479	0.747434	0.08952
480	0.75378	0.090686
481	0.759957	0.092448
482	0.766247	0.093752
483	0.77248	0.094735
484	0.778714	0.095362
485	0.785004	0.096183
486	0.791124	0.096354
487	0.797527	0.097638
488	0.803704	0.09847
489	0.809937	0.0995
490	0.816227	0.100166
491	0.822404	0.101201
492	0.82875	0.102347
493	0.834927	0.103287
494	0.841274	0.104503
495	0.84745	0.105644
496	0.853684	0.106039
497	0.859974	0.106556
498	0.86615	0.107484
499	0.872497	0.108479
500	0.878674	0.109127
501	0.884964	0.109839
502	0.891254	0.11125
503	0.897431	0.112217
504	0.903721	0.113276
505	0.909897	0.114576
506	0.916301	0.116093
507	0.922477	0.117244
508	0.928711	0.116996
509	0.934944	0.117834
510	0.941177	0.118619
511	0.947524	0.11953
512	0.953701	0.119728
513	0.959991	0.121535
514	0.966224	0.122669
515	0.972401	0.12313
516	0.97869	0.123571
517	0.984924	0.125268
518	0.991271	0.126383
519	0.997447	0.127366
520	1.00374	0.12696
521	1.00997	0.127967
522	1.01615	0.127658
523	1.02249	0.128992
524	1.02861	0.130004
525	1.03502	0.131253
526	1.04119	0.130437
527	1.04743	0.131203
528	1.05372	0.130915
529	1.05995	0.132583
530	1.06624	0.132965
531	1.07242	0.134904
532	1.07876	0.135825
533	1.085	0.137513
534	1.09117	0.137885
535	1.09746	0.138522
536	1.10364	0.139465
537	1.11004	0.139165
538	1.11622	0.139293
539	1.12251	0.140255
540	1.12874	0.141223
541	1.13492	0.142934
542	1.14121	0.143827
543	1.14739	0.145465
544	1.15379	0.146682
545	1.15997	0.148011
546	1.1662	0.148175
547	1.17249	0.14785
548	1.17867	0.149511
549	1.18501	0.149118
550	1.19119	0.151328
551	1.19754	0.152767
552	1.20371	0.154475
553	1.20995	0.154139
554	1.21624	0.154848
555	1.22241	0.156689
556	1.22876	0.157335
557	1.23494	0.159197
558	1.24123	0.160511
559	1.24752	0.161986
560	1.25369	0.162377
561	1.25998	0.163051
562	1.2661	0.163539
563	1.27251	0.164939
564	1.27868	0.166352
565	1.28492	0.165601
566	1.29121	0.166482
567	1.29744	0.167787
568	1.30373	0.169316
569	1.30991	0.17172
570	1.31625	0.172666
571	1.32249	0.173984
572	1.32866	0.173494
573	1.33495	0.174422
574	1.34113	0.175029
575	1.34753	0.176007
576	1.35371	0.1767
577	1.36	0.176918
578	1.36623	0.178671
579	1.37241	0.180399
580	1.37876	0.180191
581	1.38493	0.179643
582	1.39128	0.180536
583	1.39746	0.183006
584	1.40369	0.184136
585	1.40992	0.185674
586	1.41616	0.187585
587	1.4225	0.189204
588	1.42868	0.190806
589	1.43503	0.191829
590	1.44126	0.192225
591	1.44744	0.191252
592	1.45367	0.191803
593	1.4599	0.191405
594	1.46625	0.189284
595	1.47243	0.191065
596	1.47872	0.191897
597	1.48501	0.19168
598	1.49118	0.192522
599	1.49753	0.194883
600	1.50365	0.196346
601	1.51	0.19755
602	1.51623	0.197379
603	1.52241	0.198913
604	1.5287	0.199092
605	1.53493	0.200825
606	1.54128	0.20084
607	1.54745	0.202611
608	1.55374	0.203051
609	1.55998	0.203545
610	1.56615	0.205044
611	1.5725	0.205522
612	1.57862	0.208892
613	1.58502	0.211203
614	1.5912	0.211829
615	1.59749	0.211858
616	1.60372	0.215081
617	1.60996	0.216465
618	1.61625	0.21806
619	1.62237	0.218686
620	1.62877	0.220412
621	1.63495	0.222311
622	1.64118	0.223626
623	1.64741	0.225534
624	1.65365	0.225053
625	1.65999	0.22194
626	1.66617	0.223803
627	1.67252	0.223635
628	1.67875	0.22618
629	1.68493	0.228013
630	1.69127	0.231138
631	1.69745	0.234014
632	1.70374	0.23709
633	1.70997	0.239707
634	1.71621	0.241459
635	1.7225	0.242598
636	1.72867	0.242708
637	1.73502	0.24485
638	1.74114	0.246621
639	1.74754	0.248752
640	1.75372	0.249217
641	1.7599	0.24804
642	1.76619	0.252102
643	1.77242	0.25405
644	1.77877	0.255674
645	1.78494	0.255288
646	1.79129	0.256256
647	1.79747	0.258096
648	1.8037	0.256523
649	1.80999	0.25854
650	1.81611	0.259309
651	1.82251	0.260941
652	1.82869	0.262158
653	1.83498	0.261722
654	1.84116	0.263901
655	1.84745	0.264807
656	1.85374	0.265162
657	1.85991	0.265151
658	1.86626	0.264688
659	1.87249	0.267031
660	1.87867	0.266931
661	1.88496	0.267508
662	1.89119	0.263845
663	1.89748	0.268463
664	1.90366	0.26717
665	1.91001	0.269431
666	1.91624	0.271276
667	1.92242	0.27222
668	1.92876	0.274777
669	1.93488	0.274159
670	1.94129	0.275887
671	1.94746	0.27524
672	1.9537	0.278199
673	1.95999	0.277133
674	1.96622	0.280097
675	1.97251	0.283081
676	1.97863	0.287566
677	1.98503	0.23146
678	1.99121	0.247143
679	1.99739	0.260752
680	2.00373	0.271992
681	2.00997	0.279964
682	2.01626	0.28622
683	2.02244	0.290794
684	2.02878	0.293061
685	2.03501	0.295873
686	2.04119	0.297121
687	2.04748	0.298066
688	2.0536	0.298468
689	2.06	0.302017
690	2.06624	0.305238
691	2.07247	0.307875
692	2.0787	0.308265
693	2.08494	0.293127
694	2.09123	0.301262
695	2.0974	0.308459
696	2.10375	0.311579
697	2.10998	0.313212
698	2.11616	0.316465
699	2.12245	0.319651
700	2.12868	0.320253
701	2.13503	0.313189
702	2.14115	0.317429
703	2.1475	0.322564
704	2.15379	0.324934
705	2.15991	0.326211
706	2.16626	0.328385
707	2.17237	0.329256
708	2.17878	0.329804
709	2.18495	0.330844
710	2.19124	0.332495
711	2.19748	0.334168
712	2.20371	0.332838
713	2.21	0.335111
714	2.21612	0.338441
715	2.22253	0.338214
716	2.2287	0.336999
717	2.23494	0.342993
718	2.24123	0.346063
719	2.24746	0.338749
720	2.25375	0.343609
721	2.25992	0.346965
722	2.26627	0.342502
723	2.27251	0.348494
724	2.27868	0.351103
725	2.28503	0.3483
726	2.29109	0.334882
727	2.2975	0.345418
728	2.30373	0.34551
729	2.30996	0.346764
730	2.3162	0.350322
731	2.32243	0.339691
732	2.32877	0.349263
733	2.33489	0.344672
734	2.3413	0.339875
735	2.34748	0.347996
736	2.35365	0.34036
737	2.36	0.348156
738	2.36618	0.346984
739	2.37247	0.337648
740	2.3787	0.348696
741	2.38499	0.344675
742	2.39128	0.348355
743	2.3974	0.354802
744	2.40374	0.351583
745	2.40992	0.359598
746	2.41627	0.363625
747	2.42245	0.360039
748	2.42874	0.3633
749	2.43497	0.36694
750	2.44115	0.365688
751	2.44749	0.36904
752	2.45361	0.370417
753	2.46001	0.370745
754	2.46625	0.373366
755	2.47242	0.375167
756	2.47871	0.376565
757	2.48495	0.378425
758	2.49124	0.380372
759	2.49742	0.38164
760	2.50376	0.384074
761	2.50999	0.385596
762	2.51617	0.386782
763	2.52252	0.388578
764	2.52858	0.390381
765	2.53504	0.393476
766	2.54122	0.395885
767	2.54745	0.397939
768	2.55369	0.400732
769	2.55992	0.403087
770	2.56621	0.404673
771	2.57239	0.405072
772	2.57879	0.40809
773	2.58496	0.409553
774	2.5912	0.410514
775	2.59749	0.411995
776	2.60366	0.412971
777	2.60995	0.41434
778	2.61619	0.417805
779	2.62248	0.420296
780	2.62877	0.420809
781	2.6337	0.387859
782	2.63999	0.399826
783	2.64616	0.407177
784	2.65251	0.41055
785	2.65863	0.413287
786	2.66498	0.418704
787	2.67127	0.422315
788	2.67739	0.424772
789	2.68373	0.426946
790	2.68991	0.426688
791	2.69626	0.431191
792	2.70243	0.433719
793	2.70878	0.433079
794	2.71502	0.432166
795	2.72119	0.431608
796	2.72748	0.429539
797	2.7336	0.433519
798	2.74001	0.435905
799	2.74624	0.439244
800	2.75247	0.440032
801	2.7587	0.442726
802	2.76494	0.441654
803	2.77123	0.438037
804	2.77735	0.440908
805	2.78375	0.443341
806	2.78999	0.446827
807	2.79503	0.44954
808	2.79667	0.047123
809	2.79746	0.000391
Specimen: 2
Number of data points: 882
Maximum Load point: 854 Maximum Load: 0.46696 kN
Maximum Extension point: 882 Maximum Extension: 3.04136 mm
___________________________________________________
1	-0.000113	-9.5e-05
2	0.000227	-4e-05
3	0.002267	-0.000112
4	0.003627	-0.000129
5	0.004873	-7.9e-05
6	0.00612	1e-06
7	0.007423	-2.6e-05
8	0.00867	1e-06
9	0.00986	-7.1e-05
10	0.011163	1.1e-05
11	0.012467	-0.000119
12	0.013713	-0.000135
13	0.014903	-0.000125
14	0.01615	-0.000168
15	0.017397	-0.000117
16	0.018643	-3.3e-05
17	0.01989	2.2e-05
18	0.021193	-2e-05
19	0.02244	2.5e-05
20	0.023743	-3e-06
21	0.024933	-6e-05
22	0.026123	-9.7e-05
23	0.02737	2.5e-05
24	0.028673	-0.000122
25	0.029977	-0.000114
26	0.031167	-3.9e-05
27	0.03247	4e-06
28	0.033717	-4e-06
29	0.034963	-2.1e-05
30	0.036153	1.6e-05
31	0.0374	-0.000128
32	0.03859	-4e-05
33	0.03995	-6.4e-05
34	0.041197	-8e-05
35	0.042443	-4.5e-05
36	0.043747	4.6e-05
37	0.044993	9e-06
38	0.046183	4.6e-05
39	0.047373	5.9e-05
40	0.048677	5e-05
41	0.049867	-4.9e-05
42	0.051227	-6.5e-05
43	0.052417	-9.9e-05
44	0.053663	-6.3e-05
45	0.054967	-5.3e-05
46	0.05627	3.1e-05
47	0.05746	4e-06
48	0.05865	2e-05
49	0.059897	1.6e-05
50	0.061143	-4.8e-05
51	0.062447	-6.4e-05
52	0.063693	-6e-05
53	0.06494	-4.6e-05
54	0.066243	-8.2e-05
55	0.06749	-4.5e-05
56	0.06868	3.9e-05
57	0.069927	1.1e-05
58	0.071117	-6.1e-05
59	0.07242	4.5e-05
60	0.073723	8.5e-05
61	0.074913	-5e-05
62	0.076217	-6.6e-05
63	0.07752	-9e-06
64	0.07871	-4.9e-05
65	0.0799	-0.000105
66	0.081147	6.4e-05
67	0.082393	-2.4e-05
68	0.083697	-2.9e-05
69	0.084943	4.1e-05
70	0.086247	5.1e-05
71	0.087493	-0.000127
72	0.08874	-8e-05
73	0.089873	-0.000118
74	0.09112	-3e-06
75	0.092367	-0.000105
76	0.09367	5e-06
77	0.094973	-9e-06
78	0.09622	7e-06
79	0.097523	-1.1e-05
80	0.09877	1.7e-05
81	0.09996	-9.2e-05
82	0.10115	-6.5e-05
83	0.102397	-5.1e-05
84	0.103643	-4.5e-05
85	0.104947	-7.1e-05
86	0.10625	5.6e-05
87	0.10744	7.8e-05
88	0.108687	-5e-06
89	0.10999	2.2e-05
90	0.11118	9e-06
91	0.112427	-8.4e-05
92	0.113617	-3.5e-05
93	0.11492	-0.00014
94	0.116167	-1.1e-05
95	0.117413	-0.000114
96	0.11866	-2.3e-05
97	0.119963	6e-06
98	0.12121	2.9e-05
99	0.1224	-0.000104
100	0.123647	7e-05
101	0.124837	-0.000117
102	0.126197	-7.5e-05
103	0.127443	-8.9e-05
104	0.12869	-8.2e-05
105	0.129993	-9.3e-05
106	0.131297	-3.1e-05
107	0.132487	4.3e-05
108	0.133677	3.1e-05
109	0.134923	3e-05
110	0.136113	-1.8e-05
111	0.137417	-5e-06
112	0.138663	-2.9e-05
113	0.13991	-2.9e-05
114	0.141213	-8.2e-05
115	0.142517	-7.1e-05
116	0.14365	6e-06
117	0.144897	6e-06
118	0.146087	-3.4e-05
119	0.14739	-1e-06
120	0.148693	2.6e-05
121	0.14994	-4.5e-05
122	0.151187	-7e-05
123	0.15249	-0.0001
124	0.153737	-9.4e-05
125	0.15487	-6.3e-05
126	0.156117	4e-05
127	0.157363	2.9e-05
128	0.158667	3.9e-05
129	0.160027	0.000131
130	0.161217	4.1e-05
131	0.16252	-5.1e-05
132	0.163767	-4.1e-05
133	0.1649	-6.3e-05
134	0.166147	-3.1e-05
135	0.167393	-9.7e-05
136	0.16864	-3.5e-05
137	0.17	7.4e-05
138	0.17119	1.7e-05
139	0.172437	-1.4e-05
140	0.17374	1.5e-05
141	0.174987	-3.9e-05
142	0.17612	-8.8e-05
143	0.177367	-7.5e-05
144	0.178557	-0.000127
145	0.179973	-6.5e-05
146	0.181277	-1e-06
147	0.182467	9.1e-05
148	0.18377	7.8e-05
149	0.185017	0.000123
150	0.186207	-3.8e-05
151	0.187397	-1.8e-05
152	0.1887	-6.5e-05
153	0.18989	-6.6e-05
154	0.19125	-3.9e-05
155	0.192497	-4e-05
156	0.193687	0.000134
157	0.19499	6.9e-05
158	0.196237	3.5e-05
159	0.197427	0.000136
160	0.198673	9.6e-05
161	0.199863	-6.4e-05
162	0.201167	-4.3e-05
163	0.202413	-8.7e-05
164	0.20366	-3.9e-05
165	0.204963	7e-06
166	0.206267	7.8e-05
167	0.207457	8.6e-05
168	0.208647	6.1e-05
169	0.209893	0.0001
170	0.211083	3.4e-05
171	0.212443	-2.4e-05
172	0.21369	-4e-06
173	0.21488	-4.5e-05
174	0.216183	-2.6e-05
175	0.217487	2.5e-05
176	0.218733	7.3e-05
177	0.219923	0.000108
178	0.22117	0.000123
179	0.222417	7e-05
180	0.22372	6e-05
181	0.224967	-5.4e-05
182	0.226213	-1.5e-05
183	0.22746	-3.1e-05
184	0.228763	3.4e-05
185	0.229897	-6e-05
186	0.231143	4.6e-05
187	0.232333	8.3e-05
188	0.233693	7.5e-05
189	0.234997	-6e-06
190	0.236187	5.3e-05
191	0.237433	-7.8e-05
192	0.238737	-5.3e-05
193	0.239983	5e-06
194	0.241117	-4e-05
195	0.24242	-8.3e-05
196	0.24361	6.1e-05
197	0.244913	4.4e-05
198	0.246217	8.1e-05
199	0.247407	-4.1e-05
200	0.24871	5.5e-05
201	0.250013	-6.4e-05
202	0.251203	-2.9e-05
203	0.252393	7e-06
204	0.253697	-8.4e-05
205	0.254887	-4e-05
206	0.25619	0.000108
207	0.257437	5.3e-05
208	0.258683	4.8e-05
209	0.25993	6.3e-05
210	0.261233	5.4e-05
211	0.262423	-2.4e-05
212	0.26367	-4.8e-05
213	0.26486	3.6e-05
214	0.266163	-3.1e-05
215	0.267467	-4.9e-05
216	0.268657	6.9e-05
217	0.26996	4.9e-05
218	0.271207	1.9e-05
219	0.27251	-1e-06
220	0.273643	7.1e-05
221	0.27489	-1.5e-05
222	0.27608	-4.5e-05
223	0.27744	-4.6e-05
224	0.278744	-7e-05
225	0.279934	-4.9e-05
226	0.281237	3e-05
227	0.28254	-8e-06
228	0.283673	2.7e-05
229	0.28492	7.8e-05
230	0.286167	5e-06
231	0.287413	-6.9e-05
232	0.288717	1e-06
233	0.289964	-7.5e-05
234	0.29121	-4.5e-05
235	0.292457	-8.7e-05
236	0.29376	4.9e-05
237	0.294894	0.00011
238	0.29614	4.3e-05
239	0.297387	4.9e-05
240	0.29869	4.3e-05
241	0.299994	-1.6e-05
242	0.301184	-2.9e-05
243	0.302487	-5.1e-05
244	0.30379	-5.4e-05
245	0.30498	-8e-05
246	0.30617	5.8e-05
247	0.307417	8.8e-05
248	0.308607	4.1e-05
249	0.30991	5.9e-05
250	0.31127	2.6e-05
251	0.31246	-2.8e-05
252	0.313707	-5.5e-05
253	0.31501	-3.6e-05
254	0.3162	2.7e-05
255	0.317447	-5.5e-05
256	0.318694	2.9e-05
257	0.319884	1e-05
258	0.321187	9.3e-05
259	0.322434	5.6e-05
260	0.32368	5.5e-05
261	0.324984	-3.8e-05
262	0.32623	-1.4e-05
263	0.32742	-7.6e-05
264	0.328667	-1e-05
265	0.329857	-7.1e-05
266	0.33116	2.4e-05
267	0.332464	0.000101
268	0.33371	3.6e-05
269	0.335014	-3e-06
270	0.33626	3.7e-05
271	0.33745	-6.9e-05
272	0.33864	-5.9e-05
273	0.339944	-8.7e-05
274	0.341134	-8.7e-05
275	0.342437	-1e-06
276	0.34374	3.7e-05
277	0.344987	6.3e-05
278	0.346234	6.9e-05
279	0.34748	5.1e-05
280	0.34867	5.1e-05
281	0.349917	-7.6e-05
282	0.351164	-9e-06
283	0.35241	-5.1e-05
284	0.353714	2.5e-05
285	0.35496	-0.000103
286	0.356207	5.3e-05
287	0.35751	1e-05
288	0.358757	6.1e-05
289	0.35989	3.2e-05
290	0.361137	4e-06
291	0.362327	-7.1e-05
292	0.363687	-1.8e-05
293	0.364934	-7e-05
294	0.36618	-5e-05
295	0.367484	-5.3e-05
296	0.36873	2.4e-05
297	0.369977	5.6e-05
298	0.371167	-2e-05
299	0.372414	2.5e-05
300	0.37366	3.5e-05
301	0.374964	-6e-06
302	0.37621	-4.5e-05
303	0.377457	-7e-05
304	0.378704	-0.000105
305	0.380007	-3.9e-05
306	0.38114	5.6e-05
307	0.382387	0.000101
308	0.383577	4.9e-05
309	0.384937	9e-05
310	0.386184	5.9e-05
311	0.387487	-1.3e-05
312	0.388734	-5.6e-05
313	0.38998	-1.3e-05
314	0.391227	-0.000102
315	0.392417	9e-06
316	0.393664	-4e-06
317	0.394854	6.3e-05
318	0.396214	3.7e-05
319	0.39746	2e-05
320	0.398707	3.7e-05
321	0.40001	-0.00012
322	0.401257	-3.3e-05
323	0.402447	-6.1e-05
324	0.403637	1e-05
325	0.404884	-1.3e-05
326	0.40613	-1.5e-05
327	0.40749	4.5e-05
328	0.408737	8.1e-05
329	0.409984	-1.3e-05
330	0.41123	9e-06
331	0.412477	-8.3e-05
332	0.413667	-6.3e-05
333	0.414914	-6.8e-05
334	0.416104	-0.00011
335	0.417464	-6.6e-05
336	0.418767	7.3e-05
337	0.419957	8.3e-05
338	0.421204	6e-05
339	0.422507	4.3e-05
340	0.423697	-4e-06
341	0.424944	-2.3e-05
342	0.42619	-7.5e-05
343	0.42738	-5.6e-05
344	0.428684	-2.4e-05
345	0.429987	-6.1e-05
346	0.431234	4.6e-05
347	0.43248	1.9e-05
348	0.433727	3.5e-05
349	0.434917	2.4e-05
350	0.436164	-1.3e-05
351	0.437354	-0.000109
352	0.438657	-1.6e-05
353	0.43996	-2.5e-05
354	0.441207	-6.6e-05
355	0.442454	-6.5e-05
356	0.443757	0.000104
357	0.445004	1.7e-05
358	0.446137	3.1e-05
359	0.447384	2.1e-05
360	0.448574	2.5e-05
361	0.449934	8.6e-05
362	0.451237	0.000382
363	0.452427	0.00058
364	0.45373	0.001008
365	0.455034	0.001338
366	0.456224	0.001648
367	0.457414	0.001815
368	0.45866	0.001951
369	0.459907	0.001475
370	0.46121	0.001351
371	0.462457	0.001514
372	0.463704	0.001916
373	0.465007	0.002333
374	0.466254	0.002751
375	0.467444	0.003164
376	0.468634	0.003976
377	0.46988	0.004791
378	0.471184	0.005644
379	0.472487	0.006413
380	0.473677	0.007201
381	0.47498	0.007953
382	0.476227	0.008994
383	0.477474	0.009972
384	0.478607	0.0109
385	0.47991	0.01203
386	0.4811	0.013054
387	0.48246	0.014361
388	0.483707	0.015437
389	0.484954	0.016321
390	0.4862	0.017338
391	0.487504	0.018139
392	0.488694	0.019002
393	0.489884	0.019733
394	0.491187	0.020487
395	0.492377	0.021194
396	0.49368	0.022102
397	0.494927	0.022821
398	0.49623	0.023387
399	0.497477	0.02403
400	0.498724	0.024622
401	0.499914	0.024988
402	0.50116	0.025561
403	0.502407	0.026118
404	0.503654	0.026657
405	0.504957	0.027227
406	0.506204	0.027787
407	0.507507	0.028386
408	0.508754	0.02886
409	0.51	0.029374
410	0.51119	0.029674
411	0.51238	0.030143
412	0.513627	0.030385
413	0.51493	0.030939
414	0.516234	0.031282
415	0.51748	0.031601
416	0.518727	0.032113
417	0.52003	0.032443
418	0.52122	0.03269
419	0.52241	0.033017
420	0.523657	0.03335
421	0.524904	0.033581
422	0.526207	0.034021
423	0.527454	0.03435
424	0.5287	0.034614
425	0.530004	0.034933
426	0.53125	0.035323
427	0.532384	0.035562
428	0.53363	0.035878
429	0.53482	0.036126
430	0.53618	0.036502
431	0.537484	0.036633
432	0.53873	0.036864
433	0.539977	0.037139
434	0.541224	0.037425
435	0.54247	0.03765
436	0.54366	0.038008
437	0.544907	0.038357
438	0.546154	0.038477
439	0.547457	0.038955
440	0.548704	0.039236
441	0.54995	0.039331
442	0.551254	0.039697
443	0.5525	0.04001
444	0.55369	0.040184
445	0.55488	0.040459
446	0.556184	0.040745
447	0.557374	0.041112
448	0.558677	0.041454
449	0.55998	0.041632
450	0.561227	0.041884
451	0.56253	0.042134
452	0.56372	0.042419
453	0.56491	0.042614
454	0.566157	0.042966
455	0.567347	0.043103
456	0.56865	0.043514
457	0.569954	0.043742
458	0.5712	0.043817
459	0.572504	0.04402
460	0.57375	0.044201
461	0.57494	0.044185
462	0.57613	0.044413
463	0.577434	0.044434
464	0.578624	0.044562
465	0.579927	0.044844
466	0.58123	0.045015
467	0.58242	0.045198
468	0.583724	0.045411
469	0.585027	0.045668
470	0.58616	0.045803
471	0.587407	0.045881
472	0.588597	0.04625
473	0.5899	0.046357
474	0.591204	0.046432
475	0.59245	0.046214
476	0.593754	0.046387
477	0.595	0.046704
478	0.596247	0.046937
479	0.59738	0.047102
480	0.598627	0.04762
481	0.599874	0.047622
482	0.601177	0.048032
483	0.60248	0.048332
484	0.60367	0.04866
485	0.604974	0.049025
486	0.606277	0.049413
487	0.607467	0.04958
488	0.608657	0.049929
489	0.614947	0.051806
490	0.621067	0.053262
491	0.627527	0.054913
492	0.633704	0.056991
493	0.639937	0.05916
494	0.64617	0.061873
495	0.652404	0.064259
496	0.65875	0.0664
497	0.66487	0.067744
498	0.671217	0.069359
499	0.67745	0.070993
500	0.683684	0.07319
501	0.689974	0.075071
502	0.69615	0.077287
503	0.702497	0.078698
504	0.708674	0.079573
505	0.714964	0.079672
506	0.721197	0.080743
507	0.727374	0.081154
508	0.73372	0.082395
509	0.739897	0.083087
510	0.746244	0.084359
511	0.75242	0.085613
512	0.75871	0.086581
513	0.764944	0.087717
514	0.771177	0.089591
515	0.777467	0.091129
516	0.783587	0.09185
517	0.78999	0.092465
518	0.796224	0.093845
519	0.802401	0.094858
520	0.80869	0.095569
521	0.814924	0.096806
522	0.821214	0.098204
523	0.827447	0.098977
524	0.833737	0.09966
525	0.839971	0.100128
526	0.846147	0.101094
527	0.852494	0.101931
528	0.858557	0.102727
529	0.865017	0.103157
530	0.871194	0.104556
531	0.877427	0.105031
532	0.883717	0.105644
533	0.889894	0.10647
534	0.89624	0.107199
535	0.902417	0.108647
536	0.908764	0.109777
537	0.914941	0.110402
538	0.921174	0.111588
539	0.927464	0.112777
540	0.933641	0.113651
541	0.939987	0.114771
542	0.946164	0.116167
543	0.952454	0.116235
544	0.958744	0.117529
545	0.964921	0.117743
546	0.971211	0.118665
547	0.977387	0.118924
548	0.983734	0.120121
549	0.989967	0.121607
550	0.996201	0.121627
551	1.00249	0.122552
552	1.00867	0.123038
553	1.01496	0.12355
554	1.02113	0.12506
555	1.02748	0.125895
556	1.03371	0.127864
557	1.03989	0.127536
558	1.04624	0.128108
559	1.05241	0.129128
560	1.0587	0.130774
561	1.06494	0.132167
562	1.07123	0.133631
563	1.07752	0.134735
564	1.08369	0.13544
565	1.08998	0.13518
566	1.09605	0.136494
567	1.10251	0.137856
568	1.10868	0.138976
569	1.11497	0.138836
570	1.12121	0.14105
571	1.12744	0.142149
572	1.13373	0.142402
573	1.13991	0.142161
574	1.14625	0.1427
575	1.15249	0.142721
576	1.15866	0.143901
577	1.1649	0.145561
578	1.17113	0.147204
579	1.17748	0.148811
580	1.18365	0.150542
581	1.19	0.151333
582	1.19623	0.152191
583	1.20241	0.152163
584	1.2087	0.152391
585	1.21488	0.153868
586	1.22122	0.153842
587	1.2274	0.15561
588	1.23369	0.15677
589	1.23998	0.159035
590	1.24616	0.160448
591	1.2525	0.160613
592	1.25862	0.160117
593	1.26503	0.162134
594	1.2712	0.163104
595	1.27738	0.163314
596	1.28373	0.165328
597	1.2899	0.166857
598	1.29625	0.167726
599	1.30243	0.16967
600	1.30872	0.170058
601	1.31501	0.172002
602	1.32118	0.170648
603	1.32747	0.173065
604	1.33359	0.173705
605	1.34	0.173498
606	1.34623	0.176224
607	1.35246	0.177464
608	1.3587	0.179765
609	1.36493	0.178288
610	1.37116	0.180483
611	1.3774	0.181912
612	1.38374	0.181036
613	1.38998	0.183399
614	1.39615	0.184428
615	1.4025	0.186489
616	1.40868	0.187163
617	1.41497	0.181707
618	1.4212	0.186932
619	1.42749	0.18831
620	1.43372	0.186256
621	1.4399	0.184625
622	1.44625	0.186693
623	1.45237	0.188576
624	1.45877	0.188606
625	1.46495	0.191233
626	1.47118	0.192954
627	1.47741	0.194682
628	1.48365	0.194057
629	1.48999	0.197002
630	1.49611	0.197683
631	1.50252	0.198979
632	1.50875	0.201043
633	1.51493	0.199776
634	1.52122	0.203376
635	1.52739	0.204828
636	1.53374	0.20498
637	1.53992	0.20581
638	1.54621	0.207843
639	1.5525	0.209846
640	1.55867	0.210334
641	1.56502	0.210039
642	1.57108	0.211885
643	1.57749	0.210921
644	1.58372	0.21316
645	1.58995	0.212613
646	1.59619	0.216525
647	1.60242	0.215542
648	1.60871	0.218104
649	1.61489	0.220645
650	1.62123	0.220819
651	1.62747	0.214613
652	1.63364	0.220038
653	1.63993	0.222199
654	1.64617	0.218228
655	1.65246	0.221843
656	1.65863	0.224317
657	1.66498	0.22549
658	1.67121	0.224703
659	1.67745	0.226841
660	1.68374	0.225047
661	1.68986	0.22792
662	1.69626	0.226703
663	1.70244	0.228101
664	1.70867	0.230947
665	1.71496	0.228647
666	1.72114	0.229951
667	1.72748	0.232996
668	1.73366	0.234368
669	1.74001	0.231929
670	1.74618	0.237309
671	1.75242	0.239752
672	1.75876	0.239407
673	1.76488	0.237022
674	1.77123	0.240547
675	1.77746	0.239804
676	1.7837	0.242545
677	1.78993	0.245769
678	1.79616	0.246646
679	1.80245	0.245146
680	1.80857	0.246842
681	1.81503	0.246239
682	1.82121	0.248967
683	1.82744	0.253069
684	1.83368	0.254472
685	1.83991	0.252356
686	1.8462	0.256123
687	1.85238	0.258337
688	1.85878	0.258141
689	1.86496	0.258178
690	1.87113	0.263164
691	1.87748	0.266105
692	1.88366	0.264515
693	1.89	0.251774
694	1.89618	0.263751
695	1.90247	0.270598
696	1.9087	0.273497
697	1.91488	0.259291
698	1.92117	0.269212
699	1.92735	0.276574
700	1.93375	0.279697
701	1.93999	0.279798
702	1.94372	0.18502
703	1.94996	0.20127
704	1.95625	0.215936
705	1.96248	0.229598
706	1.96866	0.241795
707	1.97495	0.252755
708	1.98107	0.261906
709	1.98753	0.267852
710	1.99371	0.259143
711	1.99994	0.270172
712	2.00617	0.277588
713	2.01241	0.280489
714	2.01501	0.181167
715	2.02124	0.200865
716	2.02742	0.215508
717	2.03365	0.229435
718	2.04	0.242773
719	2.04607	0.254721
720	2.05253	0.265478
721	2.0587	0.272748
722	2.06494	0.277353
723	2.07117	0.280667
724	2.0774	0.28359
725	2.08369	0.28547
726	2.08987	0.282464
727	2.09627	0.291046
728	2.10245	0.296865
729	2.10868	0.296172
730	2.10998	0.217675
731	2.11622	0.227881
732	2.1224	0.242604
733	2.12874	0.257025
734	2.13497	0.270576
735	2.14115	0.282732
736	2.14744	0.292785
737	2.15367	0.300194
738	2.15997	0.305715
739	2.16495	0.226819
740	2.17124	0.238361
741	2.17742	0.253283
742	2.18365	0.267777
743	2.18994	0.281704
744	2.19618	0.294019
745	2.20247	0.303542
746	2.20864	0.310262
747	2.21504	0.259923
748	2.21618	0.22375
749	2.22247	0.240073
750	2.22865	0.254785
751	2.23499	0.269349
752	2.24117	0.282888
753	2.24746	0.296083
754	2.25375	0.306388
755	2.25992	0.314763
756	2.26621	0.321207
757	2.27233	0.324394
758	2.27874	0.310345
759	2.28491	0.32119
760	2.29121	0.328898
761	2.29744	0.331362
762	2.30373	0.233112
763	2.30996	0.252969
764	2.31608	0.267807
765	2.32254	0.282569
766	2.32872	0.296239
767	2.33489	0.309322
768	2.34118	0.320929
769	2.34742	0.329338
770	2.35371	0.33583
771	2.35988	0.340016
772	2.36623	0.340645
773	2.37247	0.331891
774	2.37864	0.34072
775	2.38499	0.34632
776	2.39116	0.348589
777	2.39751	0.34869
778	2.39995	0.226911
779	2.40618	0.244407
780	2.41242	0.259674
781	2.41871	0.274552
782	2.42494	0.288279
783	2.43123	0.30208
784	2.43746	0.314808
785	2.44364	0.326799
786	2.44998	0.337888
787	2.4561	0.346024
788	2.46251	0.35325
789	2.46868	0.35815
790	2.47378	0.24032
791	2.47996	0.257818
792	2.48614	0.273119
793	2.49243	0.287562
794	2.49866	0.301674
795	2.50501	0.315321
796	2.51118	0.327854
797	2.51748	0.340433
798	2.52371	0.350772
799	2.52989	0.357254
800	2.53623	0.360509
801	2.54235	0.359054
802	2.54875	0.362231
803	2.55493	0.361369
804	2.56116	0.355383
805	2.56745	0.364338
806	2.57369	0.364972
807	2.57998	0.358646
808	2.5861	0.362802
809	2.5925	0.366934
810	2.59868	0.365804
811	2.60491	0.357631
812	2.6112	0.363601
813	2.61743	0.36584
814	2.62372	0.366646
815	2.62996	0.369463
816	2.63625	0.372609
817	2.64248	0.373941
818	2.64866	0.374237
819	2.65495	0.376131
820	2.66107	0.378213
821	2.66753	0.379306
822	2.6737	0.381081
823	2.67994	0.382955
824	2.68617	0.38528
825	2.6924	0.38659
826	2.69875	0.38959
827	2.70487	0.392012
828	2.71128	0.395789
829	2.71745	0.399013
830	2.72363	0.401231
831	2.72992	0.40373
832	2.73615	0.406628
833	2.7425	0.410433
834	2.74867	0.414153
835	2.75496	0.417955
836	2.7612	0.421339
837	2.76737	0.423367
838	2.77372	0.426514
839	2.7799	0.429585
840	2.78619	0.432799
841	2.79248	0.436315
842	2.79871	0.439835
843	2.80495	0.443212
844	2.81112	0.445844
845	2.81747	0.448828
846	2.82359	0.45098
847	2.82999	0.454289
848	2.83623	0.457231
849	2.8424	0.459587
850	2.84869	0.463288
851	2.85493	0.464392
852	2.86127	0.464729
853	2.86739	0.466556
854	2.8687	0.466958
855	2.87493	0.464576
856	2.88122	0.46299
857	2.8874	0.46039
858	2.89374	0.461073
859	2.89992	0.459112
860	2.90621	0.458467
861	2.91244	0.456117
862	2.91867	0.449772
863	2.92496	0.452422
864	2.93108	0.42939
865	2.93749	0.4282
866	2.94372	0.417345
867	2.94996	0.4182
868	2.95619	0.419807
869	2.96242	0.421836
870	2.96871	0.421439
871	2.97489	0.414932
872	2.98123	0.416225
873	2.98747	0.41853
874	2.99364	0.416963
875	2.99999	0.415572
876	3.00617	0.417062
877	3.01246	0.41833
878	3.01869	0.421272
879	3.02498	0.423968
880	3.03121	0.426901
881	3.03739	0.429992
882	3.04136	-0.012562
Specimen: 3
Number of data points: 958
Maximum Load point: 936 Maximum Load: 0.45480 kN
Maximum Extension point: 958 Maximum Extension: 3.31132 mm
___________________________________________________
1	0	-3.7e-05
2	0.000453	1.4e-05
3	0.001813	-5.6e-05
4	0.0034	-7.1e-05
5	0.004817	-7.2e-05
6	0.00612	-2.2e-05
7	0.007423	-5e-06
8	0.00867	-4.6e-05
9	0.009917	-6.7e-05
10	0.01122	-3e-05
11	0.012467	-6.5e-05
12	0.013657	2.9e-05
13	0.014903	5.6e-05
14	0.01615	-2.3e-05
15	0.017453	9e-06
16	0.0187	6.6e-05
17	0.01989	-0.000146
18	0.021193	-8.2e-05
19	0.022497	3e-06
20	0.0238	-2.3e-05
21	0.024933	-0.000116
22	0.02618	1.9e-05
23	0.02737	5.4e-05
24	0.02873	2e-06
25	0.030033	3.6e-05
26	0.031223	4.3e-05
27	0.032527	-0.0001
28	0.033773	-6.2e-05
29	0.03502	1.3e-05
30	0.03621	1.2e-05
31	0.037457	-2.8e-05
32	0.038703	0.000126
33	0.040007	-2.5e-05
34	0.041253	4.6e-05
35	0.0425	1.3e-05
36	0.043747	4.7e-05
37	0.04505	4.6e-05
38	0.04624	-9.5e-05
39	0.04743	-3.2e-05
40	0.048677	-2.7e-05
41	0.04998	-0.0001
42	0.051283	0.000143
43	0.052473	6e-06
44	0.053777	3.2e-05
45	0.055023	3e-06
46	0.05627	3e-06
47	0.05746	6e-06
48	0.058707	-1.7e-05
49	0.059897	-2.8e-05
50	0.061257	-4.7e-05
51	0.062503	-3.8e-05
52	0.06375	0.000106
53	0.064997	3.1e-05
54	0.0663	1.9e-05
55	0.06749	-2.6e-05
56	0.06868	4.2e-05
57	0.069927	-3.8e-05
58	0.071173	-9.2e-05
59	0.072477	-7.3e-05
60	0.073723	-1e-06
61	0.07497	-2.7e-05
62	0.076217	6.3e-05
63	0.07752	7.9e-05
64	0.07871	7.1e-05
65	0.079957	-1e-06
66	0.081203	3.8e-05
67	0.08245	1.9e-05
68	0.083753	-8.6e-05
69	0.085	-3.6e-05
70	0.086303	-1e-06
71	0.08755	-4.2e-05
72	0.08874	5.1e-05
73	0.08993	5.7e-05
74	0.091233	6.9e-05
75	0.092423	-8e-06
76	0.093727	5.4e-05
77	0.09503	2e-06
78	0.09622	-6.6e-05
79	0.097523	1.4e-05
80	0.098827	3.2e-05
81	0.09996	-4.2e-05
82	0.101207	0.000103
83	0.102453	3.2e-05
84	0.1037	6.7e-05
85	0.105003	5.4e-05
86	0.10625	2.1e-05
87	0.107553	-2e-06
88	0.1088	-8.1e-05
89	0.110047	-3.3e-05
90	0.11118	-9.7e-05
91	0.112427	-9.2e-05
92	0.113673	4.7e-05
93	0.114977	6.6e-05
94	0.11628	1.1e-05
95	0.11747	4.2e-05
96	0.118773	4.8e-05
97	0.120077	-1.7e-05
98	0.121267	-7.1e-05
99	0.122457	-5.2e-05
100	0.123703	-6.5e-05
101	0.12495	-0.000184
102	0.126253	4.4e-05
103	0.1275	2.6e-05
104	0.128747	6.6e-05
105	0.13005	6.6e-05
106	0.131297	4.7e-05
107	0.13243	-6.5e-05
108	0.133677	-1.5e-05
109	0.134923	-6.3e-05
110	0.136227	-5.3e-05
111	0.13753	-2.2e-05
112	0.138777	5.2e-05
113	0.140023	5.1e-05
114	0.14127	2.3e-05
115	0.142517	3.3e-05
116	0.143707	-3e-06
117	0.144953	-3.5e-05
118	0.146143	-3e-05
119	0.147503	-3.1e-05
120	0.148807	-7.3e-05
121	0.149997	-7.7e-05
122	0.1513	4.8e-05
123	0.152547	2.7e-05
124	0.153737	5.3e-05
125	0.154927	3.6e-05
126	0.15623	7.7e-05
127	0.15742	-9.2e-05
128	0.15878	-0.000131
129	0.15997	-2.6e-05
130	0.161273	-2.7e-05
131	0.16252	-5.1e-05
132	0.163767	-4.3e-05
133	0.164957	3.6e-05
134	0.166203	7.6e-05
135	0.167337	2.6e-05
136	0.168697	6.1e-05
137	0.170057	-2.7e-05
138	0.171247	-6e-06
139	0.17255	-5e-05
140	0.173797	7e-06
141	0.174987	1.7e-05
142	0.176177	7.3e-05
143	0.17748	5.6e-05
144	0.17867	5.7e-05
145	0.179973	1.9e-05
146	0.181277	0.000103
147	0.182467	-1.2e-05
148	0.18377	-4.1e-05
149	0.185073	-9e-05
150	0.186263	-6e-06
151	0.187453	1.6e-05
152	0.188643	9.4e-05
153	0.189947	-1e-06
154	0.19125	8.3e-05
155	0.192497	5.3e-05
156	0.1938	-2.1e-05
157	0.195047	-4.6e-05
158	0.196293	-9.3e-05
159	0.197483	-4.2e-05
160	0.19873	2e-06
161	0.19992	-2.7e-05
162	0.201223	-2e-06
163	0.202527	6.8e-05
164	0.203717	4.3e-05
165	0.20502	1.9e-05
166	0.206323	2.3e-05
167	0.207513	7e-06
168	0.208703	-3.3e-05
169	0.20995	-4.5e-05
170	0.211197	-2.2e-05
171	0.2125	-3.2e-05
172	0.213747	9.4e-05
173	0.21505	0.000109
174	0.216297	1.3e-05
175	0.217543	9e-06
176	0.218733	4.6e-05
177	0.21998	-1.7e-05
178	0.22117	9e-06
179	0.222473	-8.1e-05
180	0.22372	-4.5e-05
181	0.224967	-2.8e-05
182	0.226213	1.9e-05
183	0.227517	1.3e-05
184	0.228763	9.1e-05
185	0.229953	7.9e-05
186	0.2312	0.000113
187	0.23239	-3.3e-05
188	0.23375	-6.7e-05
189	0.234997	7e-06
190	0.236243	-1.1e-05
191	0.237547	-4.1e-05
192	0.238793	4e-06
193	0.239983	5.1e-05
194	0.241173	2.7e-05
195	0.242477	6.7e-05
196	0.243667	1.3e-05
197	0.24497	-1.1e-05
198	0.246217	-5.1e-05
199	0.247463	-4.2e-05
200	0.248767	8e-06
201	0.25007	-6e-06
202	0.251203	7.2e-05
203	0.25245	9.7e-05
204	0.253697	5.7e-05
205	0.254943	1.1e-05
206	0.256303	5.6e-05
207	0.257493	5.1e-05
208	0.258797	-7.8e-05
209	0.260044	-2e-05
210	0.26129	-1.3e-05
211	0.262423	-2.1e-05
212	0.263727	5.2e-05
213	0.264917	3e-06
214	0.26622	6.2e-05
215	0.267467	0.000104
216	0.268714	4.2e-05
217	0.270017	-3.1e-05
218	0.27132	-1.2e-05
219	0.27251	-1.1e-05
220	0.2737	-4.7e-05
221	0.274947	-1.5e-05
222	0.276193	6.6e-05
223	0.277497	5.6e-05
224	0.278744	3.7e-05
225	0.280047	8.9e-05
226	0.281293	2.4e-05
227	0.28254	1.6e-05
228	0.28373	-7.8e-05
229	0.284977	-1e-05
230	0.286167	-2.5e-05
231	0.28747	-4.3e-05
232	0.288774	5.9e-05
233	0.29002	3.6e-05
234	0.291267	4.6e-05
235	0.29257	3.6e-05
236	0.29376	5.3e-05
237	0.29495	-6.3e-05
238	0.296197	-5e-06
239	0.297387	-5.2e-05
240	0.298747	-7.8e-05
241	0.30005	-1.6e-05
242	0.30124	7.6e-05
243	0.302543	2.6e-05
244	0.30379	9.8e-05
245	0.30498	9.2e-05
246	0.30617	8.3e-05
247	0.307474	-1e-06
248	0.308663	-9.6e-05
249	0.309967	2e-06
250	0.311214	-5.6e-05
251	0.312517	-5.6e-05
252	0.313764	9.3e-05
253	0.31501	6.2e-05
254	0.3162	4.2e-05
255	0.317447	6.3e-05
256	0.318637	6.6e-05
257	0.319997	-4.3e-05
258	0.321244	-2.2e-05
259	0.32249	3e-06
260	0.323794	-5.6e-05
261	0.32504	-3e-05
262	0.326287	4.9e-05
263	0.327477	6e-06
264	0.328724	2.4e-05
265	0.329913	2.2e-05
266	0.331217	6.6e-05
267	0.33252	-2.6e-05
268	0.333767	-2e-05
269	0.335014	-9e-05
270	0.336317	-7.1e-05
271	0.33745	-0.000113
272	0.338697	0.000125
273	0.339944	2.1e-05
274	0.34119	4.7e-05
275	0.34255	6.9e-05
276	0.34374	9.2e-05
277	0.345044	9e-06
278	0.34629	2.7e-05
279	0.347537	4.8e-05
280	0.348727	1.4e-05
281	0.349974	-3.5e-05
282	0.351107	8.2e-05
283	0.352467	1.8e-05
284	0.35377	6.1e-05
285	0.355017	1.6e-05
286	0.35632	0.000119
287	0.357567	-1e-05
288	0.358757	-8.3e-05
289	0.359947	-3.8e-05
290	0.361194	-8.3e-05
291	0.36244	-6.6e-05
292	0.363744	3.6e-05
293	0.365047	2.9e-05
[truncated: 10,457 more rows]

## Sheet: S7_Gr3 raw data
Gr3
Specimen: 1
Number of data points: 1157
Maximum Load point: 1122 Maximum Load: 0.42797 kN
Maximum Extension point: 1157 Maximum Extension: 3.98622 mm
___________________________________________________
1	0	-9.5e-05
2	0.000453	-5.8e-05
3	0.001813	-8.3e-05
4	0.003343	-2.5e-05
5	0.004817	-1.8e-05
6	0.00612	-1e-05
7	0.007423	-2.5e-05
8	0.00867	2.5e-05
9	0.009917	-2.5e-05
10	0.011163	-7.2e-05
11	0.012467	-3.5e-05
12	0.013657	6e-06
13	0.014903	-0.000125
14	0.016093	-1.9e-05
15	0.017453	-6.8e-05
16	0.0187	-3.3e-05
17	0.019947	6e-06
18	0.02125	-2.3e-05
19	0.022497	-5e-06
20	0.023743	-6.9e-05
21	0.024933	-1.9e-05
22	0.02618	-7.4e-05
23	0.027427	-0.000105
24	0.02873	-1e-05
25	0.029977	-4.2e-05
26	0.031223	-9e-06
27	0.03247	-2.2e-05
28	0.033773	-1e-05
29	0.034963	2e-06
30	0.03621	-7.4e-05
31	0.0374	-3.7e-05
32	0.038703	-7.4e-05
33	0.040007	-8.5e-05
34	0.041253	-6.9e-05
35	0.0425	-2.8e-05
36	0.043803	3.2e-05
37	0.044993	-5e-05
38	0.046183	1.6e-05
39	0.04743	1e-05
40	0.04862	-0.000137
41	0.04998	-1e-06
42	0.051227	-5.8e-05
43	0.052473	-6.9e-05
44	0.053777	-3.5e-05
45	0.055023	-4.4e-05
46	0.05627	7e-05
47	0.05746	5.6e-05
48	0.058707	-1.8e-05
49	0.059897	-1.1e-05
50	0.061257	2.7e-05
51	0.062503	-6.5e-05
52	0.06375	-0.000122
53	0.064997	-9.3e-05
54	0.0663	-5e-05
55	0.067433	-3.5e-05
56	0.06868	4e-06
57	0.06987	5.1e-05
58	0.07123	-3e-06
59	0.072533	-3e-06
60	0.07378	-0.000107
61	0.075027	-3.5e-05
62	0.076273	-9.9e-05
63	0.07752	-8.3e-05
64	0.07871	6e-06
65	0.079957	-4e-06
66	0.081147	-1.1e-05
67	0.08245	5.2e-05
68	0.083753	6.9e-05
69	0.085	-8e-06
70	0.086303	-1.6e-05
71	0.08755	-0.00012
72	0.08874	-6.9e-05
73	0.08993	7e-06
74	0.09112	-4.8e-05
75	0.092423	-8e-06
76	0.093727	-3e-06
77	0.094973	4.1e-05
78	0.09622	2.4e-05
79	0.097523	-3e-06
80	0.09877	-8e-06
81	0.09996	-3.7e-05
82	0.101207	5e-06
83	0.10234	-8e-05
84	0.1037	-9.2e-05
85	0.105003	-4e-06
86	0.10625	2e-05
87	0.107553	5.1e-05
88	0.1088	4e-05
89	0.10999	0.000128
90	0.11118	-3.8e-05
91	0.112427	-5e-06
92	0.113673	-5.7e-05
93	0.114977	-1.5e-05
94	0.116223	-4.5e-05
95	0.11747	0
96	0.118773	-2.2e-05
97	0.12002	4.5e-05
98	0.12121	4.5e-05
99	0.122457	1e-05
100	0.123647	-6.4e-05
101	0.12495	-2.2e-05
102	0.126253	-8.2e-05
103	0.1275	-0.000114
104	0.128803	-0.000128
105	0.13005	0.000109
106	0.131297	1.5e-05
107	0.132487	-1.5e-05
108	0.133733	1.7e-05
109	0.134867	2e-05
110	0.136227	-6.4e-05
111	0.137473	-3.8e-05
112	0.138663	-4e-05
113	0.139967	-5.3e-05
114	0.141327	-5.3e-05
115	0.142517	1.9e-05
116	0.143707	-3.8e-05
117	0.144953	3e-05
118	0.146143	-2.2e-05
119	0.147503	-3.5e-05
120	0.14875	-2.2e-05
121	0.149997	2.9e-05
122	0.151243	-6e-05
123	0.152547	-1.8e-05
124	0.15368	-3.8e-05
125	0.154927	1e-05
126	0.156173	-3e-05
127	0.15742	5.5e-05
128	0.158723	-3.5e-05
129	0.159913	-1e-05
130	0.161217	3.2e-05
131	0.16252	-2.9e-05
132	0.163767	-7.5e-05
133	0.164957	-4.2e-05
134	0.166147	-1.9e-05
135	0.167393	2.5e-05
136	0.168697	-8e-06
137	0.17	6.7e-05
138	0.171247	-9e-06
139	0.172493	4e-05
140	0.173797	-8.4e-05
141	0.174987	-3.5e-05
142	0.176177	-6e-05
143	0.177423	-1.8e-05
144	0.17867	-0.000115
145	0.179973	2.6e-05
146	0.18122	5.1e-05
147	0.182467	3.9e-05
148	0.18377	3.6e-05
149	0.185017	2.9e-05
150	0.186207	-2.3e-05
151	0.187453	-1e-06
152	0.188643	-0.000104
153	0.189947	-4.3e-05
154	0.191307	-7.8e-05
155	0.192497	6e-05
156	0.1938	1.4e-05
157	0.195047	-1.3e-05
158	0.196293	1.5e-05
159	0.197427	8.6e-05
160	0.198673	-7.8e-05
161	0.19992	-1.5e-05
162	0.201223	-4e-05
163	0.202527	-1.9e-05
164	0.203717	-1.5e-05
165	0.204963	-2.4e-05
166	0.206323	7.6e-05
167	0.207457	3.9e-05
168	0.208647	3.5e-05
169	0.20995	5.1e-05
170	0.21114	-0.000123
171	0.2125	1e-06
172	0.213747	-3.8e-05
173	0.214993	-3.2e-05
174	0.21624	2.5e-05
175	0.217543	5e-05
176	0.218677	1.5e-05
177	0.219923	4e-05
178	0.221113	-1.1e-05
179	0.222473	9.6e-05
180	0.22372	1e-05
181	0.224967	-2e-05
182	0.22627	-1.6e-05
183	0.227573	-6e-06
184	0.228763	-3.5e-05
185	0.229953	4.4e-05
186	0.2312	0.000118
187	0.23239	8.1e-05
188	0.233693	7.6e-05
189	0.234997	2.1e-05
190	0.236243	3.7e-05
191	0.23749	2.5e-05
192	0.238793	-2.3e-05
193	0.239983	7.9e-05
194	0.24123	-9e-06
195	0.24242	8.1e-05
196	0.243667	-4e-06
197	0.24497	6.6e-05
198	0.246217	9.1e-05
199	0.24752	7.4e-05
200	0.248767	2e-05
201	0.250013	-2e-05
202	0.251203	-7.2e-05
203	0.25245	0
204	0.25364	1.9e-05
205	0.254943	5.7e-05
206	0.256303	3.2e-05
207	0.257493	4.9e-05
208	0.25874	5.6e-05
209	0.260044	2.1e-05
210	0.261233	-3.4e-05
211	0.262423	1e-05
212	0.263727	-2.5e-05
213	0.264917	-8.5e-05
214	0.26622	4e-06
215	0.267467	8.1e-05
216	0.268714	6.7e-05
217	0.270017	2.1e-05
218	0.271263	3.4e-05
219	0.272453	7.4e-05
220	0.273643	1e-05
221	0.27489	1.2e-05
222	0.276193	9e-06
223	0.277497	-3e-06
224	0.278744	4e-05
225	0.27999	1.1e-05
226	0.281293	0.000111
227	0.28254	0.000109
228	0.28373	6.9e-05
229	0.28492	4.9e-05
230	0.28611	-3e-05
231	0.28747	1.6e-05
232	0.288774	-5.3e-05
233	0.289964	6e-06
234	0.291267	-4.2e-05
235	0.292514	4.9e-05
236	0.293703	3e-05
237	0.294894	2.6e-05
238	0.296197	2.7e-05
239	0.297444	6.5e-05
240	0.298747	-1.9e-05
241	0.299994	-1.8e-05
242	0.30124	9e-06
243	0.302543	-1e-05
244	0.30379	-5e-05
245	0.30498	7.7e-05
246	0.30617	5.2e-05
247	0.30736	7.6e-05
248	0.30872	0.000118
249	0.310024	7.7e-05
250	0.31127	-4e-05
251	0.312574	9e-06
252	0.313764	-2.5e-05
253	0.31501	1.2e-05
254	0.3162	-3.3e-05
255	0.317447	4.5e-05
256	0.318694	-3.4e-05
257	0.319997	3.9e-05
258	0.321244	8.4e-05
259	0.32249	5.6e-05
260	0.323737	5e-06
261	0.32504	1e-06
262	0.32623	6e-06
263	0.327477	2.9e-05
264	0.328667	-9.4e-05
265	0.329913	4.7e-05
266	0.331217	6e-05
267	0.332464	2.4e-05
268	0.333767	0.0001
269	0.335014	7e-06
270	0.33626	1.7e-05
271	0.33745	-1.3e-05
272	0.338697	-1.6e-05
273	0.339887	-8.9e-05
274	0.341247	-5.5e-05
275	0.342494	4.2e-05
276	0.343684	4.7e-05
277	0.344987	6.5e-05
278	0.34629	-6e-06
279	0.347537	1.9e-05
280	0.34867	-5e-05
281	0.349917	-2.9e-05
282	0.351164	2.5e-05
283	0.352467	-1.9e-05
284	0.35377	-0.000117
285	0.355017	7.4e-05
286	0.356264	2.5e-05
287	0.35751	8.6e-05
288	0.3587	6.5e-05
289	0.359947	3.1e-05
290	0.361137	-3e-05
291	0.36244	-3e-05
292	0.363744	1.1e-05
293	0.36499	-2.7e-05
294	0.366294	-4e-06
295	0.36754	3.2e-05
296	0.368787	6.4e-05
297	0.36992	4.9e-05
298	0.371167	9.9e-05
299	0.372357	6e-06
300	0.373717	4.1e-05
301	0.37502	-3.5e-05
302	0.376267	2e-05
303	0.377514	-3e-05
304	0.37876	-4.4e-05
305	0.380007	5.9e-05
306	0.381197	7.2e-05
307	0.382444	9.7e-05
308	0.38369	-9e-06
309	0.384994	4.9e-05
310	0.386184	-2.2e-05
311	0.38743	-1e-05
312	0.388734	-5.9e-05
313	0.390037	-9.2e-05
314	0.391227	-6.9e-05
315	0.392417	8.5e-05
316	0.393664	7.4e-05
317	0.394967	6.1e-05
318	0.39627	-3.4e-05
319	0.39746	5.5e-05
320	0.398764	-3.8e-05
321	0.40001	4.5e-05
322	0.401257	-9e-05
323	0.402447	-2.3e-05
324	0.403694	7.9e-05
325	0.404884	5.1e-05
326	0.406187	6.9e-05
327	0.40749	2.1e-05
328	0.408737	5.7e-05
329	0.409984	9e-06
330	0.411287	1.2e-05
331	0.412477	-6.4e-05
332	0.413667	-8e-06
333	0.414914	5e-06
334	0.41616	-2.5e-05
335	0.41752	7.2e-05
336	0.418767	4.1e-05
337	0.420014	7.7e-05
338	0.42126	5.1e-05
339	0.422507	6.5e-05
340	0.423697	-1.3e-05
341	0.424944	1.2e-05
342	0.426134	-4.2e-05
343	0.427437	3.4e-05
344	0.42874	-2.2e-05
345	0.429987	2.9e-05
346	0.43129	2e-05
347	0.432537	7.2e-05
348	0.433784	3.6e-05
349	0.434917	0.000116
350	0.43622	-9e-05
351	0.43741	-5.3e-05
352	0.438714	-8.5e-05
353	0.440074	-3.8e-05
354	0.441264	4.2e-05
355	0.44251	2e-06
356	0.443757	7.6e-05
357	0.444947	-9e-06
358	0.446194	2.6e-05
359	0.44744	0.000102
360	0.448687	-2.8e-05
361	0.44999	1.6e-05
362	0.451237	2.5e-05
363	0.452484	2e-06
364	0.453787	-4.8e-05
365	0.455034	0.000123
366	0.456167	-9e-06
367	0.457414	5.6e-05
368	0.45866	2.4e-05
369	0.459964	7e-06
370	0.461267	9e-06
371	0.462514	-1e-06
372	0.46376	-6e-06
373	0.465064	1.2e-05
374	0.466254	-5.7e-05
375	0.467444	0.000108
376	0.46869	4.9e-05
377	0.46988	7.4e-05
378	0.47124	0.000106
379	0.472544	5.7e-05
380	0.473734	-4.5e-05
381	0.475037	-6e-05
382	0.476284	-1.1e-05
383	0.477417	1.2e-05
384	0.478664	-8.7e-05
385	0.47991	3.2e-05
386	0.481214	0.00013
387	0.482517	5.7e-05
388	0.483764	4.2e-05
389	0.48501	5.4e-05
390	0.486257	-5.3e-05
391	0.487504	1.4e-05
392	0.488694	-3e-06
393	0.48994	-5e-05
394	0.49113	-6.7e-05
395	0.49249	3.9e-05
396	0.493737	5.1e-05
397	0.494984	0.000447
398	0.496287	0.001011
399	0.497534	0.001534
400	0.498724	0.001914
401	0.499914	0.002165
402	0.501217	0.002073
403	0.502464	0.002575
404	0.503767	0.003087
405	0.505014	0.003472
406	0.506204	0.003702
407	0.507507	0.003945
408	0.50881	0.004217
409	0.51	0.004325
410	0.51119	0.004449
411	0.51238	0.004468
412	0.513684	0.00443
413	0.514987	0.004474
414	0.516234	0.004463
415	0.517537	0.004572
416	0.518784	0.004605
417	0.52003	0.004493
418	0.521164	0.004496
419	0.522467	0.004516
420	0.523657	0.004336
421	0.525017	0.004508
422	0.526264	0.004438
423	0.52751	0.004474
424	0.528757	0.004381
425	0.53006	0.00448
426	0.53125	0.004453
427	0.53244	0.00455
428	0.53363	0.004499
429	0.534934	0.004441
430	0.536237	0.00442
431	0.537484	0.004468
432	0.53873	0.004421
433	0.540034	0.004407
434	0.54128	0.004479
435	0.542414	0.004486
436	0.54366	0.004486
437	0.54485	0.00444
438	0.54621	0.004528
439	0.547514	0.004553
440	0.54876	0.00442
441	0.550007	0.004436
442	0.55131	0.004493
443	0.5525	0.00437
444	0.55369	0.004425
445	0.554937	0.00448
446	0.556127	0.004453
447	0.557487	0.00452
448	0.558734	0.004496
449	0.560037	0.004582
450	0.561284	0.00444
451	0.56253	0.004411
452	0.56372	0.004429
453	0.564967	0.004459
454	0.566157	0.00439
455	0.56746	0.004524
456	0.568764	0.004539
457	0.569954	0.004483
458	0.571257	0.004567
459	0.572504	0.004474
460	0.57375	0.004431
461	0.57494	0.004485
462	0.576187	0.004455
463	0.577377	0.004474
464	0.578737	0.00445
465	0.58004	0.004543
466	0.58123	0.004498
467	0.582534	0.004572
468	0.583837	0.004594
469	0.585027	0.004456
470	0.58616	0.004441
471	0.587464	0.004475
472	0.588654	0.004448
473	0.590014	0.004484
474	0.59126	0.004465
475	0.592507	0.004533
476	0.593754	0.004456
477	0.595057	0.004549
478	0.59619	0.004504
479	0.597437	0.004505
480	0.598627	0.004475
481	0.59993	0.00442
482	0.601234	0.004445
483	0.60248	0.004445
484	0.603784	0.004544
485	0.60503	0.004556
486	0.606277	0.004508
487	0.60741	0.004503
488	0.608714	0.004521
489	0.609904	0.004509
490	0.611207	0.004505
491	0.61251	0.004444
492	0.613757	0.004494
493	0.615004	0.004516
494	0.616307	0.004481
495	0.617497	0.004544
496	0.618687	0.004524
497	0.619934	0.00456
498	0.62118	0.004406
499	0.622484	0.004524
500	0.62373	0.004513
501	0.625034	0.004479
502	0.62628	0.004504
503	0.627527	0.004402
504	0.628717	0.004444
505	0.629964	0.004562
506	0.631154	0.004598
507	0.632457	0.004592
508	0.63376	0.004563
509	0.63495	0.004529
510	0.636254	0.004531
511	0.6375	0.004386
512	0.638747	0.004495
513	0.639937	0.004417
514	0.641184	0.004424
515	0.642374	0.004538
516	0.643734	0.004538
517	0.64498	0.004643
518	0.646227	0.004534
519	0.647474	0.004514
520	0.648777	0.00446
521	0.649967	0.004402
522	0.651214	0.004493
523	0.65246	0.004544
524	0.65365	0.004426
525	0.654954	0.004556
526	0.656257	0.004554
527	0.657504	0.00456
528	0.65875	0.004508
529	0.660054	0.004563
530	0.661187	0.004443
531	0.662434	0.004469
532	0.663624	0.00448
533	0.664927	0.004404
534	0.66623	0.004488
535	0.667477	0.004491
536	0.66878	0.004549
537	0.670027	0.004578
538	0.671274	0.004519
539	0.672407	0.004541
540	0.67371	0.004475
541	0.6749	0.004506
542	0.676204	0.004493
543	0.677564	0.004455
544	0.678754	0.004489
545	0.68	0.004592
546	0.681304	0.004615
547	0.682437	0.004582
548	0.683684	0.004578
549	0.68493	0.004546
550	0.686177	0.004505
551	0.68748	0.004531
552	0.688727	0.004493
553	0.69003	0.004498
554	0.691277	0.004459
555	0.692524	0.004474
556	0.693714	0.004496
557	0.69496	0.004525
558	0.696207	0.004471
559	0.697454	0.004471
560	0.698757	0.004463
561	0.699947	0.004446
562	0.70125	0.004505
563	0.702554	0.004495
564	0.703744	0.004499
565	0.704934	0.004479
566	0.70618	0.004456
567	0.707427	0.004544
568	0.70873	0.004494
569	0.710034	0.004602
570	0.711224	0.004491
571	0.712527	0.004415
572	0.713774	0.004381
573	0.714964	0.004367
574	0.71621	0.00452
575	0.7174	0.00452
576	0.718704	0.004506
577	0.71995	0.004599
578	0.721197	0.00452
579	0.7225	0.004498
580	0.723747	0.004484
581	0.724994	0.004439
582	0.726184	0.004407
583	0.72743	0.004443
584	0.72862	0.004335
585	0.72998	0.004511
586	0.731284	0.004508
587	0.732474	0.004567
588	0.733777	0.004485
589	0.735024	0.004549
590	0.736214	0.00441
591	0.73746	0.00446
592	0.738707	0.004448
593	0.739897	0.004399
594	0.741257	0.004461
595	0.742504	0.004488
596	0.743751	0.004533
597	0.744997	0.004461
598	0.7463	0.004573
599	0.747434	0.004485
600	0.74868	0.00441
601	0.74987	0.004489
602	0.75123	0.004454
603	0.752534	0.004422
604	0.753724	0.004392
605	0.755027	0.00449
606	0.756274	0.004506
607	0.75752	0.004499
608	0.75871	0.004525
609	0.759957	0.004474
610	0.761147	0.004381
611	0.762507	0.004494
612	0.763754	0.004464
613	0.765	0.004481
614	0.766304	0.004504
615	0.76755	0.004481
616	0.76874	0.004485
617	0.76993	0.004549
618	0.771177	0.004504
619	0.772424	0.004496
620	0.773784	0.004463
621	0.774974	0.004458
622	0.776277	0.004422
623	0.777524	0.00442
624	0.778771	0.00454
625	0.77996	0.004519
626	0.781207	0.004453
627	0.78234	0.004459
628	0.7837	0.004485
629	0.785004	0.004503
630	0.786194	0.00442
631	0.787554	0.004389
632	0.7888	0.004432
633	0.78999	0.00435
634	0.79118	0.004435
635	0.792427	0.004473
636	0.793674	0.004489
637	0.794977	0.004568
638	0.796224	0.004494
639	0.797527	0.004469
640	0.803591	0.004425
641	0.81005	0.004504
642	0.816227	0.00452
643	0.822517	0.004478
644	0.82875	0.004475
645	0.834927	0.004528
646	0.841217	0.004511
647	0.847394	0.004445
648	0.853797	0.004528
649	0.859974	0.00465
650	0.866207	0.00449
651	0.872497	0.004605
652	0.878731	0.004498
653	0.884964	0.004558
654	0.891197	0.004495
655	0.897544	0.004573
656	0.903721	0.00453
657	0.909954	0.004506
658	0.916244	0.004516
659	0.922477	0.004598
660	0.928767	0.004572
661	0.934944	0.00464
662	0.941234	0.004559
663	0.947467	0.004632
664	0.953644	0.004524
665	0.959991	0.004563
666	0.966111	0.004471
667	0.972514	0.004544
668	0.978747	0.004504
669	0.984924	0.004562
670	0.991271	0.004479
671	0.997447	0.005101
672	1.00374	0.005299
673	1.00991	0.006261
674	1.01626	0.006398
675	1.02249	0.006672
676	1.02867	0.00679
677	1.03502	0.006999
678	1.04114	0.007044
679	1.04754	0.007194
680	1.05372	0.007209
681	1.06001	0.007277
682	1.06624	0.007368
683	1.07242	0.007434
684	1.07876	0.00766
685	1.08488	0.007774
686	1.09129	0.007823
687	1.09746	0.007925
688	1.1037	0.007893
689	1.10999	0.007955
690	1.11622	0.007889
691	1.12251	0.008036
692	1.12869	0.007936
693	1.13503	0.007988
694	1.14127	0.007827
695	1.14744	0.007809
696	1.15373	0.007709
697	1.15991	0.010245
698	1.16626	0.01365
699	1.17243	0.017272
700	1.17872	0.015316
701	1.18501	0.015118
702	1.19119	0.015555
703	1.19754	0.016189
704	1.2036	0.01641
705	1.21006	0.016699
706	1.21624	0.016657
707	1.22241	0.016824
708	1.2287	0.016526
709	1.23494	0.016631
710	1.24128	0.016964
711	1.24746	0.017365
712	1.25375	0.017709
713	1.26004	0.018098
714	1.26616	0.018244
715	1.27245	0.018384
716	1.27868	0.018205
717	1.28503	0.01805
718	1.29121	0.018126
719	1.2975	0.018179
720	1.30373	0.018268
721	1.30991	0.017895
722	1.31625	0.017543
723	1.32237	0.017593
724	1.32878	0.017515
725	1.33495	0.017643
726	1.34119	0.017414
727	1.34748	0.017431
728	1.35371	0.017583
729	1.36	0.017764
730	1.36618	0.017572
731	1.37252	0.017633
732	1.37876	0.01752
733	1.38493	0.01763
734	1.39122	0.017649
735	1.3974	0.018954
736	1.4038	0.023561
737	1.40998	0.027929
738	1.41621	0.032274
739	1.4225	0.036872
740	1.42868	0.041008
741	1.43503	0.044922
742	1.44115	0.04815
743	1.44755	0.051295
744	1.45373	0.053529
745	1.4599	0.05523
746	1.46619	0.056887
747	1.47248	0.058484
748	1.47877	0.059996
749	1.48495	0.061618
750	1.4913	0.063222
751	1.49753	0.064979
752	1.50365	0.06627
753	1.50994	0.068221
754	1.51617	0.070629
755	1.52252	0.073268
756	1.52875	0.075933
757	1.53499	0.078979
758	1.54122	0.082329
759	1.54745	0.08573
760	1.5538	0.089038
761	1.55986	0.091943
762	1.56632	0.094786
763	1.5725	0.096815
764	1.57868	0.09797
765	1.58497	0.099428
766	1.5912	0.100151
767	1.59749	0.100444
768	1.60372	0.100445
769	1.61001	0.101302
770	1.61625	0.103077
771	1.62242	0.104819
772	1.62877	0.106263
773	1.63489	0.107901
774	1.64129	0.109323
775	1.64747	0.111008
776	1.6537	0.112304
777	1.65999	0.11391
778	1.66617	0.114738
779	1.67252	0.115523
780	1.67869	0.116317
781	1.68504	0.117263
782	1.69127	0.117974
783	1.69745	0.118978
784	1.70374	0.120363
785	1.70992	0.121051
786	1.71626	0.121063
787	1.72244	0.121694
788	1.72879	0.121952
789	1.73496	0.123742
790	1.7412	0.12511
791	1.74749	0.126826
792	1.75372	0.128598
793	1.76007	0.130566
794	1.76619	0.131757
795	1.77248	0.132318
796	1.77877	0.133005
797	1.78494	0.133447
798	1.79123	0.132884
799	1.79735	0.133292
800	1.80376	0.133368
801	1.80999	0.13375
802	1.81622	0.132947
803	1.82246	0.131675
804	1.82869	0.130718
805	1.83504	0.130364
806	1.84121	0.129469
807	1.8475	0.128099
808	1.85374	0.12858
809	1.85991	0.129038
810	1.8662	0.12895
811	1.87238	0.12998
812	1.87878	0.13015
813	1.88496	0.130114
814	1.89125	0.131483
815	1.89748	0.133789
816	1.90366	0.136166
817	1.91001	0.138143
818	1.91613	0.140352
819	1.92253	0.142498
820	1.92876	0.143857
821	1.93494	0.145298
822	1.94123	0.146648
823	1.94746	0.148467
824	1.95375	0.149984
825	1.95993	0.151536
826	1.96628	0.153028
827	1.97251	0.153928
828	1.97869	0.154895
829	1.98503	0.156085
830	1.99115	0.156567
831	1.9975	0.156838
832	2.00373	0.156825
833	2.00997	0.155344
834	2.01626	0.15458
835	2.02244	0.15541
836	2.02873	0.157097
837	2.0349	0.157336
838	2.0413	0.159
839	2.04748	0.160426
840	2.05371	0.160986
841	2.06	0.162742
842	2.06618	0.163188
843	2.07253	0.163997
844	2.0787	0.164243
845	2.085	0.16346
846	2.09129	0.161948
847	2.0974	0.161
848	2.10375	0.157981
849	2.10987	0.157554
850	2.11627	0.157495
851	2.12245	0.158921
852	2.12874	0.157256
853	2.13497	0.158484
854	2.14121	0.15908
855	2.14756	0.159492
856	2.15367	0.156939
857	2.16002	0.15727
858	2.16626	0.157685
859	2.17249	0.156521
860	2.17872	0.15663
861	2.18495	0.157667
862	2.1913	0.158859
863	2.19742	0.161924
864	2.20377	0.164699
865	2.21	0.168
866	2.21618	0.16854
867	2.22247	0.168345
868	2.22865	0.170227
869	2.23499	0.173523
870	2.24123	0.174599
871	2.24746	0.174091
872	2.25375	0.173802
873	2.25992	0.175058
874	2.26627	0.177054
875	2.27239	0.177223
876	2.2788	0.177146
877	2.28497	0.178857
878	2.29121	0.17953
879	2.2975	0.181982
880	2.30373	0.181456
881	2.31002	0.183319
882	2.3162	0.183691
883	2.32254	0.185572
884	2.32872	0.188675
885	2.33495	0.189416
886	2.34124	0.190619
887	2.34736	0.192842
888	2.35377	0.192292
889	2.36	0.191832
890	2.36623	0.194438
891	2.37247	0.197943
892	2.3787	0.198695
893	2.38499	0.199709
894	2.39116	0.201092
895	2.39751	0.20431
896	2.40374	0.206846
897	2.40998	0.206501
898	2.41621	0.209234
899	2.42245	0.2076
900	2.42874	0.208969
901	2.43491	0.209212
902	2.44126	0.208401
903	2.44749	0.210591
904	2.45367	0.211174
905	2.46001	0.21359
906	2.46619	0.215642
907	2.47254	0.217276
908	2.47871	0.219625
909	2.48495	0.218906
910	2.49124	0.221012
911	2.49742	0.223103
912	2.50376	0.227536
913	2.50988	0.230066
914	2.51628	0.233639
915	2.52252	0.234898
916	2.52869	0.236296
917	2.53493	0.239348
918	2.54122	0.239371
919	2.54751	0.240997
920	2.55369	0.243648
921	2.56003	0.241119
922	2.56627	0.245173
923	2.57244	0.246208
924	2.57879	0.245854
925	2.58485	0.246077
926	2.59125	0.250208
927	2.59749	0.250918
928	2.60372	0.249451
929	2.60995	0.25303
930	2.61619	0.252026
931	2.62254	0.254133
932	2.62866	0.254941
933	2.63506	0.254594
934	2.64129	0.258011
935	2.64741	0.259117
936	2.6537	0.258793
937	2.65993	0.263193
938	2.66628	0.263728
939	2.67246	0.262441
940	2.67875	0.260956
941	2.68504	0.262356
942	2.69122	0.263828
943	2.69751	0.261137
944	2.70363	0.267569
945	2.71003	0.270733
946	2.7162	0.263369
947	2.72244	0.270534
948	2.72873	0.275023
949	2.73258	0.173316
950	2.73876	0.192425
951	2.74493	0.206776
952	2.75122	0.220669
953	2.7574	0.233202
954	2.76381	0.245288
955	2.76998	0.256287
956	2.77622	0.265247
957	2.78251	0.27248
958	2.78868	0.27601
959	2.79503	0.276488
960	2.80115	0.282535
961	2.80755	0.286263
962	2.81005	0.186396
963	2.81622	0.180884
964	2.82234	0.195273
965	2.8288	0.209437
966	2.83498	0.222539
967	2.84121	0.234952
968	2.8475	0.247279
969	2.85368	0.258674
970	2.86002	0.269718
971	2.86614	0.278595
972	2.87255	0.286852
973	2.87878	0.293138
974	2.88496	0.296683
975	2.89125	0.296431
976	2.89743	0.297603
977	2.90377	0.301142
978	2.91006	0.160597
979	2.91624	0.182215
980	2.92253	0.19709
981	2.92865	0.210864
982	2.93499	0.2248
983	2.94117	0.237915
984	2.94752	0.251175
985	2.9537	0.263764
986	2.95999	0.276313
987	2.96622	0.287467
988	2.97245	0.296722
989	2.97874	0.304405
990	2.98492	0.309828
991	2.99126	0.31069
992	2.995	0.225773
993	2.99625	0.14677
994	3.00254	0.16326
995	3.00877	0.177853
996	3.01495	0.191545
997	3.0213	0.205618
998	3.02736	0.218417
999	3.03376	0.231695
1000	3.04	0.24414
1001	3.04623	0.256543
1002	3.05247	0.268451
1003	3.0587	0.279959
1004	3.06499	0.290891
1005	3.07117	0.30035
1006	3.07751	0.308321
1007	3.08374	0.315378
1008	3.08992	0.321366
1009	3.09621	0.326473
1010	3.10244	0.329242
1011	3.10873	0.328933
1012	3.11497	0.331859
1013	3.12126	0.337439
1014	3.12749	0.336479
1015	3.12885	0.142347
1016	3.13497	0.164805
1017	3.14126	0.17933
1018	3.14744	0.193223
1019	3.15379	0.206825
1020	3.16002	0.220285
1021	3.1662	0.232954
1022	3.17248	0.245801
1023	3.17866	0.258273
1024	3.18501	0.270748
1025	3.19124	0.282634
1026	3.19742	0.294105
1027	3.20371	0.305322
1028	3.20994	0.315495
1029	3.21629	0.324446
1030	3.22241	0.331486
1031	3.22881	0.33793
1032	3.23499	0.342998
1033	3.24117	0.342616
1034	3.24258	0.150172
1035	3.24876	0.170202
1036	3.25494	0.184385
1037	3.26128	0.198521
1038	3.26751	0.212277
1039	3.27369	0.225292
1040	3.27998	0.238503
1041	3.2861	0.251128
1042	3.2925	0.263854
1043	3.29874	0.276014
1044	3.30503	0.287975
1045	3.31121	0.299534
1046	3.31744	0.310573
1047	3.32378	0.321295
1048	3.32991	0.330449
1049	3.33631	0.338582
1050	3.34248	0.345783
1051	3.34872	0.352145
1052	3.35501	0.358246
1053	3.36118	0.362558
1054	3.36748	0.365528
1055	3.37139	0.176191
1056	3.37751	0.182039
1057	3.38363	0.1969
1058	3.39003	0.210991
1059	3.39626	0.22456
1060	3.4025	0.237872
1061	3.40873	0.251052
1062	3.41496	0.263687
1063	3.42125	0.276433
1064	3.42737	0.288146
1065	3.43377	0.300653
1066	3.44001	0.312372
1067	3.44618	0.323829
1068	3.45248	0.335073
1069	3.45871	0.345327
1070	3.465	0.353863
1071	3.47118	0.361459
1072	3.47752	0.368408
1073	3.48375	0.374653
1074	3.48993	0.37949
1075	3.49628	0.383735
1076	3.50013	0.281016
1077	3.50127	0.181474
1078	3.5075	0.198305
1079	3.51368	0.212542
1080	3.52002	0.22681
1081	3.52625	0.240278
1082	3.53243	0.253283
1083	3.53872	0.265903
1084	3.54495	0.278491
1085	3.55125	0.290777
1086	3.55742	0.302978
1087	3.56377	0.315371
1088	3.57	0.327386
1089	3.57618	0.338782
1090	3.58247	0.350225
1091	3.5887	0.360374
1092	3.59499	0.369423
1093	3.60123	0.377154
1094	3.60746	0.384698
1095	3.61375	0.391561
1096	3.61992	0.397443
1097	3.62627	0.402577
1098	3.63239	0.403854
1099	3.63398	0.201992
1100	3.63993	0.197859
1101	3.64622	0.212892
1102	3.65245	0.226719
1103	3.6588	0.240357
1104	3.66492	0.252706
1105	3.67127	0.265724
1106	3.6775	0.277968
1107	3.68368	0.290098
1108	3.69002	0.302307
1109	3.6962	0.314412
1110	3.70255	0.326609
1111	3.70872	0.33855
1112	3.71501	0.35028
1113	3.72125	0.361654
1114	3.72748	0.372283
1115	3.73377	0.382242
1116	3.73989	0.390432
1117	3.74629	0.398711
1118	3.75247	0.406305
1119	3.7587	0.413486
1120	3.76499	0.420539
1121	3.77117	0.426349
1122	3.77502	0.427973
1123	3.77774	0.138829
1124	3.78364	0.162105
1125	3.79004	0.173296
1126	3.79627	0.184485
1127	3.80239	0.198761
1128	3.80874	0.213585
1129	3.81497	0.227984
1130	3.82126	0.242163
1131	3.82744	0.255689
1132	3.83379	0.269162
1133	3.83996	0.282081
1134	3.8462	0.294656
1135	3.85249	0.307014
1136	3.85866	0.318149
1137	3.86501	0.328224
1138	3.87124	0.337094
1139	3.87748	0.344566
1140	3.88377	0.349819
1141	3.88994	0.351266
1142	3.89623	0.353538
1143	3.90241	0.354989
1144	3.90881	0.35603
1145	3.9138	0.247357
1146	3.92003	0.265681
1147	3.92627	0.280681
1148	3.93244	0.294346
1149	3.93879	0.306769
1150	3.94485	0.316369
1151	3.95126	0.324558
1152	3.95749	0.330133
1153	3.96372	0.334415
1154	3.96882	0.122848
1155	3.97494	0.140486
1156	3.98123	0.153708
1157	3.98622	-0.002827
Specimen: 2
Number of data points: 1404
Maximum Load point: 1272 Maximum Load: 0.48132 kN
Maximum Extension point: 1404 Maximum Extension: 4.83503 mm
___________________________________________________
1	0	-2.7e-05
2	0.000453	5.5e-05
3	0.001813	-5.9e-05
4	0.0034	-3.6e-05
5	0.004817	-1e-06
6	0.006177	2.7e-05
7	0.007423	7.3e-05
8	0.008727	5.7e-05
9	0.009973	3.2e-05
10	0.01122	5.3e-05
11	0.012467	5e-06
12	0.013713	3.5e-05
13	0.01496	1.8e-05
14	0.016207	-5.7e-05
15	0.017453	4.3e-05
16	0.0187	5.3e-05
17	0.019947	0.000123
18	0.02125	3.7e-05
19	0.022497	7.2e-05
20	0.023687	-1.9e-05
21	0.024933	3.7e-05
22	0.02618	3.4e-05
23	0.027483	-2.7e-05
24	0.02873	-4e-06
25	0.029977	2e-05
26	0.031223	9e-05
27	0.032527	8.8e-05
28	0.033773	3.7e-05
29	0.034963	1.2e-05
30	0.03621	5e-06
31	0.0374	-3.5e-05
32	0.038703	6.9e-05
33	0.040007	2.4e-05
34	0.041253	1.4e-05
35	0.0425	7.4e-05
36	0.043803	1.4e-05
37	0.044993	8.2e-05
38	0.046183	6.9e-05
39	0.04743	8.4e-05
40	0.048677	-9e-06
41	0.050037	4.2e-05
42	0.051283	7e-05
43	0.05253	8e-06
44	0.053777	1.4e-05
45	0.055023	4.4e-05
46	0.056213	4e-05
47	0.05746	0.000109
48	0.05865	8.4e-05
49	0.059953	9.3e-05
50	0.061257	-1.2e-05
51	0.062503	0
52	0.06375	2.4e-05
53	0.065053	-5.1e-05
54	0.0663	-1.7e-05
55	0.067433	2.9e-05
56	0.068737	1.2e-05
57	0.069927	5.8e-05
58	0.07123	9.7e-05
59	0.072533	7.4e-05
60	0.07378	-1.1e-05
61	0.075027	9e-06
62	0.07633	7.4e-05
63	0.07752	-7e-06
64	0.07871	-5e-06
65	0.079957	1.9e-05
66	0.081203	-1e-05
67	0.082507	0
68	0.083753	1.7e-05
69	0.085	3.9e-05
70	0.086303	2.8e-05
71	0.08755	1.5e-05
72	0.088683	-2e-06
73	0.089987	1.4e-05
74	0.091177	-2e-05
75	0.09248	2e-05
76	0.093783	4e-06
77	0.094973	2.8e-05
78	0.096277	6.5e-05
79	0.09758	8e-05
80	0.09877	-4e-05
81	0.09996	-1.2e-05
82	0.101263	7.8e-05
83	0.102453	-2.7e-05
84	0.103757	0.000122
85	0.105003	0.000283
86	0.10625	0.000261
87	0.107553	0.000397
88	0.1088	0.000387
89	0.109933	0.000361
90	0.11118	0.000504
91	0.11237	0.000747
92	0.11373	0.000882
93	0.115033	0.000942
94	0.116223	0.000982
95	0.117527	0.001154
96	0.118773	0.001297
97	0.12002	0.001437
98	0.12121	0.00152
99	0.122457	0.00163
100	0.123647	0.001709
101	0.125007	0.002033
102	0.126253	0.002229
103	0.1275	0.002573
104	0.128747	0.002805
105	0.13005	0.003105
106	0.13124	0.003332
107	0.13243	0.003591
108	0.133733	0.003732
109	0.13498	0.003922
110	0.136283	0.004097
111	0.13753	0.004281
112	0.138777	0.004448
113	0.140023	0.004484
114	0.14127	0.004478
115	0.14246	0.004422
116	0.143707	0.004551
117	0.144897	0.004561
118	0.146257	0.004551
119	0.14756	0.004496
120	0.14875	0.004489
121	0.15011	0.004524
122	0.1513	0.004461
123	0.152547	0.004467
124	0.153737	0.004512
125	0.154983	0.004509
126	0.15623	0.004534
127	0.157533	0.004479
128	0.15878	0.004458
129	0.15997	0.004452
130	0.161273	0.004557
131	0.162577	0.004522
132	0.163767	0.004473
133	0.165013	0.004486
134	0.166147	0.004459
135	0.16745	0.004483
136	0.168753	0.004605
137	0.17	0.004551
138	0.171303	0.004547
139	0.17255	0.004494
140	0.173797	0.004468
141	0.174987	0.004472
142	0.176233	0.004494
143	0.177423	0.004392
144	0.178783	0.004546
145	0.18003	0.004496
146	0.18122	0.004585
147	0.182523	0.004533
148	0.183827	0.004453
149	0.185017	0.004523
150	0.186207	0.004443
151	0.187453	0.004478
152	0.1887	0.004501
153	0.190003	0.004493
154	0.19125	0.00441
155	0.192553	0.004492
156	0.1938	0.004457
157	0.195047	0.004516
158	0.196237	0.004501
159	0.197483	0.004489
160	0.198673	0.004502
161	0.199977	0.004491
162	0.20128	0.004498
163	0.20247	0.004494
164	0.203773	0.004558
165	0.205077	0.004526
166	0.206323	0.004557
167	0.207457	0.004499
168	0.208703	0.004481
169	0.209893	0.004543
170	0.211253	0.004517
171	0.212557	0.004453
172	0.213747	0.004476
173	0.21505	0.004408
174	0.216297	0.004462
175	0.217543	0.004463
176	0.218733	0.004479
177	0.21998	0.004517
178	0.221227	0.004496
179	0.22253	0.004521
180	0.22372	0.004562
181	0.224967	0.004397
182	0.22627	0.004521
183	0.227573	0.004526
184	0.228707	0.004497
185	0.229953	0.004491
186	0.2312	0.004513
187	0.232447	0.004466
188	0.233807	0.004435
189	0.234997	0.004468
190	0.2363	0.004503
191	0.237603	0.004419
192	0.238793	0.004603
193	0.239983	0.004394
194	0.24123	0.004494
195	0.24242	0.004563
196	0.243723	0.004564
197	0.24497	0.004497
198	0.246217	0.004549
199	0.247463	0.004553
200	0.248823	0.004433
201	0.250013	0.004481
202	0.251203	0.004476
203	0.252507	0.004546
204	0.253697	0.004454
205	0.255057	0.0046
206	0.256247	0.004522
207	0.25755	0.004562
208	0.258797	0.004502
209	0.260044	0.004493
210	0.261233	0.004443
211	0.26248	0.004531
212	0.26367	0.004443
213	0.264973	0.004503
214	0.266277	0.004486
215	0.267523	0.004447
216	0.26877	0.004486
217	0.270074	0.004586
218	0.271263	0.004547
219	0.272453	0.004482
220	0.2737	0.004523
221	0.27489	0.004412
222	0.27625	0.004461
223	0.277553	0.004453
224	0.278744	0.004454
225	0.280047	0.004564
226	0.281293	0.004529
227	0.282484	0.004568
228	0.28373	0.004478
229	0.284977	0.004551
230	0.286224	0.004486
231	0.287527	0.004494
232	0.288774	0.004511
233	0.290077	0.004472
234	0.291324	0.004516
235	0.29257	0.004523
236	0.293703	0.004447
237	0.29495	0.004573
238	0.29614	0.004484
239	0.2975	0.004554
240	0.298804	0.004489
241	0.299994	0.004492
242	0.301297	0.004468
243	0.302543	0.004497
244	0.30379	0.004469
245	0.30498	0.004533
246	0.306227	0.004542
247	0.307417	0.004548
248	0.30872	0.004506
249	0.310024	0.004596
250	0.31127	0.004479
251	0.312517	0.004464
252	0.31382	0.004497
253	0.314954	0.004488
254	0.3162	0.004458
255	0.317447	0.004489
256	0.31875	0.004564
257	0.320054	0.004529
258	0.321244	0.004512
259	0.322547	0.004457
260	0.323794	0.004513
261	0.32504	0.004501
262	0.32623	0.004529
263	0.327477	0.004469
264	0.32861	0.00443
265	0.32997	0.004536
266	0.331274	0.004488
267	0.33252	0.004567
268	0.333824	0.004503
269	0.33507	0.004523
270	0.33626	0.004508
271	0.33745	0.004438
272	0.338754	0.004479
273	0.339944	0.004468
274	0.341304	0.004491
275	0.342494	0.004468
276	0.34374	0.004577
277	0.345044	0.004507
278	0.346347	0.004492
279	0.34748	0.004511
280	0.348727	0.004503
281	0.349917	0.004452
282	0.35122	0.004487
283	0.352524	0.004522
284	0.35377	0.004483
285	0.355074	0.004467
286	0.35632	0.004534
287	0.357567	0.004507
288	0.3587	0.004507
289	0.360004	0.004506
290	0.361194	0.00442
291	0.362497	0.00458
292	0.3638	0.004519
293	0.36499	0.004473
294	0.366294	0.004456
295	0.36754	0.004457
296	0.36873	0.004532
297	0.369977	0.004556
298	0.371167	0.004529
299	0.37247	0.004507
300	0.373774	0.004534
301	0.37502	0.004531
302	0.376267	0.004519
303	0.37757	0.004438
304	0.378817	0.004444
305	0.37995	0.004486
306	0.381197	0.004493
307	0.382387	0.004613
308	0.383747	0.004557
309	0.38505	0.004532
310	0.38624	0.004514
311	0.387544	0.004468
312	0.38879	0.00443
313	0.390037	0.004532
314	0.391227	0.004522
315	0.392474	0.004491
316	0.39372	0.004514
317	0.394967	0.004562
318	0.39627	0.004499
319	0.397517	0.004501
320	0.39882	0.004482
321	0.400067	0.004479
322	0.401257	0.004522
323	0.402447	0.004552
324	0.403637	0.004504
325	0.404997	0.004543
326	0.4063	0.004556
327	0.40749	0.004532
328	0.408794	0.004518
329	0.41004	0.004558
330	0.411287	0.004486
331	0.412477	0.004521
332	0.413724	0.004471
333	0.414914	0.004425
334	0.416217	0.004527
335	0.41752	0.004444
336	0.418767	0.004477
337	0.42007	0.004529
338	0.421317	0.004498
339	0.422507	0.004543
340	0.423697	0.004484
341	0.424944	0.004444
342	0.42619	0.004472
343	0.42755	0.004556
344	0.42874	0.004502
345	0.429987	0.004496
346	0.43129	0.004468
347	0.432537	0.004472
348	0.433727	0.004478
349	0.434917	0.004549
350	0.436164	0.004572
351	0.437467	0.004516
352	0.43877	0.004392
353	0.440017	0.004503
354	0.441264	0.004466
355	0.442567	0.004552
356	0.443814	0.00462
357	0.444947	0.004546
358	0.446194	0.004499
359	0.447384	0.004562
360	0.448744	0.004484
361	0.450047	0.004514
362	0.451237	0.00445
363	0.45254	0.004562
364	0.453844	0.004491
365	0.455034	0.004489
366	0.456224	0.004502
367	0.45747	0.004606
368	0.45866	0.004552
369	0.46002	0.004532
370	0.461267	0.004509
371	0.46257	0.004508
372	0.463817	0.004549
373	0.465064	0.004502
374	0.466254	0.004539
375	0.4675	0.004526
376	0.46869	0.004558
377	0.469994	0.004591
378	0.471297	0.004557
379	0.472487	0.004526
380	0.47379	0.004518
381	0.475094	0.004508
382	0.476284	0.004534
383	0.477474	0.004544
384	0.47872	0.004544
385	0.47991	0.004524
386	0.48127	0.004562
387	0.482517	0.004595
388	0.483764	0.004595
389	0.48501	0.004605
390	0.486314	0.004592
391	0.487504	0.004528
392	0.488694	0.004566
393	0.489997	0.004537
394	0.491187	0.004488
395	0.49249	0.004578
396	0.493794	0.004601
397	0.49504	0.004612
398	0.496287	0.004587
399	0.497534	0.004605
400	0.498724	0.004571
401	0.49997	0.004606
402	0.50116	0.004588
403	0.502464	0.004518
404	0.503767	0.004567
405	0.505014	0.004621
406	0.506317	0.004576
407	0.507564	0.004628
408	0.508754	0.004688
409	0.509944	0.004598
410	0.511247	0.004562
411	0.512437	0.004537
412	0.51374	0.004536
413	0.515044	0.004615
414	0.51629	0.004597
415	0.517537	0.00461
416	0.51884	0.004603
417	0.519974	0.004623
418	0.521164	0.004569
419	0.522467	0.004616
420	0.523714	0.004538
421	0.525017	0.004587
422	0.526264	0.004576
423	0.527567	0.004543
424	0.528814	0.004528
425	0.53006	0.00458
426	0.53125	0.004542
427	0.532497	0.004574
428	0.533687	0.004672
429	0.53499	0.004581
430	0.536294	0.00459
431	0.537484	0.004652
432	0.538787	0.004686
433	0.54009	0.004776
434	0.54128	0.00487
435	0.54247	0.004933
436	0.543717	0.005003
437	0.544907	0.005063
438	0.546267	0.005017
439	0.547514	0.005023
440	0.54876	0.004911
441	0.550007	0.004911
442	0.55131	0.005002
443	0.5525	0.004924
444	0.553747	0.004948
445	0.554937	0.004946
446	0.556184	0.004955
447	0.557544	0.00493
448	0.558734	0.004906
449	0.560037	0.004958
450	0.561284	0.004846
451	0.56253	0.004807
452	0.563664	0.004898
453	0.564967	0.004953
454	0.566157	0.00486
455	0.567517	0.004934
456	0.56882	0.004959
457	0.57001	0.004939
458	0.571314	0.004916
459	0.572617	0.00493
460	0.57375	0.00483
461	0.574997	0.004866
462	0.576187	0.004831
463	0.577434	0.004791
464	0.578737	0.004905
465	0.579984	0.00495
466	0.58123	0.00492
467	0.582534	0.00495
468	0.58378	0.004886
469	0.58497	0.004854
470	0.586217	0.004894
471	0.587407	0.00487
472	0.58871	0.004866
473	0.59007	0.004826
474	0.59126	0.004826
475	0.592564	0.004916
476	0.59381	0.004822
477	0.595057	0.004893
478	0.596247	0.004875
479	0.597494	0.004816
480	0.598684	0.004766
481	0.599987	0.004838
482	0.60129	0.004794
483	0.60248	0.004822
484	0.603784	0.004819
485	0.605087	0.004851
486	0.60622	0.004865
487	0.607467	0.004944
488	0.608657	0.004846
489	0.60996	0.004858
490	0.611264	0.004891
491	0.61251	0.004904
492	0.613757	0.004904
493	0.61506	0.004969
494	0.616307	0.004979
495	0.617497	0.005043
496	0.618744	0.005096
497	0.619877	0.005174
498	0.621237	0.005181
499	0.62254	0.005288
500	0.62373	0.005216
501	0.625034	0.005191
502	0.626337	0.005217
503	0.627527	0.005212
504	0.628717	0.005216
505	0.629964	0.005285
506	0.63121	0.005307
507	0.632514	0.005268
508	0.63376	0.005339
509	0.635007	0.005719
510	0.636254	0.005984
511	0.637557	0.006073
512	0.638747	0.006081
513	0.639994	0.006149
514	0.641127	0.006031
515	0.642487	0.006248
516	0.64379	0.006258
517	0.64498	0.006334
518	0.646284	0.006289
519	0.64753	0.006313
520	0.648777	0.006268
521	0.649967	0.006314
522	0.651214	0.006319
523	0.652404	0.006242
524	0.653764	0.006333
525	0.65501	0.006367
526	0.656257	0.006377
527	0.65756	0.006409
528	0.658807	0.006386
529	0.659997	0.006387
530	0.661187	0.006312
531	0.66249	0.006292
532	0.66368	0.006269
533	0.664984	0.006321
534	0.66623	0.006304
535	0.667534	0.006248
536	0.66878	0.006309
537	0.670027	0.006309
538	0.671217	0.006247
539	0.672464	0.006387
540	0.673654	0.006685
541	0.675014	0.007021
542	0.67626	0.007271
543	0.67745	0.007269
544	0.678754	0.007871
545	0.680057	0.008603
546	0.681304	0.009234
547	0.682494	0.009794
548	0.68374	0.010382
549	0.684874	0.010801
550	0.686234	0.011401
551	0.687537	0.011956
552	0.688784	0.012341
553	0.69003	0.01277
554	0.691334	0.013213
555	0.692524	0.013551
556	0.693714	0.013792
557	0.69496	0.014047
558	0.696207	0.013968
559	0.69751	0.014092
560	0.698757	0.013841
561	0.70006	0.013426
562	0.701307	0.013005
563	0.702554	0.012676
564	0.703744	0.012433
565	0.704934	0.01219
566	0.70618	0.011966
567	0.707484	0.011999
568	0.708787	0.011898
569	0.709977	0.01171
570	0.71128	0.011635
571	0.712527	0.01158
572	0.713774	0.011605
573	0.714964	0.011629
574	0.716267	0.01156
575	0.717457	0.011492
576	0.71876	0.01142
577	0.720064	0.011416
578	0.721254	0.011244
579	0.7225	0.0111
580	0.723804	0.010905
581	0.724994	0.010777
582	0.726184	0.01078
583	0.72743	0.010679
584	0.728734	0.010481
585	0.730037	0.010377
586	0.731284	0.010263
587	0.73253	0.010097
588	0.733777	0.010068
589	0.735024	0.010097
590	0.736214	0.010003
591	0.73746	0.009965
592	0.73865	0.00973
593	0.74001	0.00966
594	0.741314	0.009602
595	0.742504	0.009652
596	0.743807	0.009586
597	0.745054	0.009423
598	0.746244	0.009221
599	0.747434	0.009146
600	0.748737	0.009028
601	0.749927	0.008818
602	0.75123	0.008851
603	0.752534	0.008811
604	0.75378	0.008763
605	0.755027	0.008749
606	0.75633	0.008734
607	0.757464	0.008733
608	0.75871	0.008768
609	0.759957	0.008664
610	0.761204	0.008581
611	0.762507	0.008619
612	0.763754	0.008629
613	0.765	0.008578
614	0.766304	0.008526
615	0.76755	0.0086
616	0.768684	0.008596
617	0.769987	0.00866
618	0.771177	0.008687
619	0.77248	0.008802
620	0.773784	0.008803
621	0.77503	0.008789
622	0.776277	0.008836
623	0.77758	0.008823
624	0.778771	0.008735
625	0.77996	0.008772
626	0.781264	0.008773
627	0.782454	0.008889
628	0.783757	0.00895
629	0.785004	0.008867
630	0.786251	0.008822
631	0.787554	0.008772
632	0.7888	0.008813
633	0.789934	0.008998
634	0.79118	0.009072
635	0.79237	0.009198
636	0.793787	0.009304
637	0.795034	0.009532
638	0.796224	0.009736
639	0.797527	0.009849
640	0.79883	0.010031
641	0.80002	0.010203
642	0.80121	0.010302
643	0.802457	0.010255
644	0.803647	0.01
645	0.805007	0.009591
646	0.80631	0.00913
647	0.8075	0.008514
648	0.808804	0.007741
649	0.81005	0.006875
650	0.811241	0.006665
651	0.812431	0.007034
652	0.813734	0.007633
653	0.81498	0.008273
654	0.816284	0.009122
655	0.81753	0.009869
656	0.818777	0.010677
657	0.82008	0.011455
658	0.821327	0.012274
659	0.82246	0.013028
660	0.823707	0.0137
661	0.824897	0.01435
662	0.826257	0.015088
663	0.82756	0.015816
664	0.828807	0.016296
665	0.830054	0.016923
666	0.8313	0.017327
667	0.832547	0.01766
668	0.833737	0.012164
669	0.834984	0.008326
670	0.836231	0.00861
671	0.837534	0.008857
672	0.83878	0.009026
673	0.840027	0.009193
674	0.84133	0.009412
675	0.842577	0.009711
676	0.843767	0.009879
677	0.844957	0.010028
678	0.846147	0.009903
679	0.84745	0.009967
680	0.84881	0.00998
681	0.850001	0.010053
682	0.851304	0.010157
683	0.852551	0.010171
684	0.853797	0.010371
685	0.854987	0.01059
686	0.856234	0.010686
687	0.857424	0.010821
688	0.858784	0.011009
689	0.86003	0.011139
690	0.861277	0.011294
691	0.862524	0.011377
692	0.863827	0.011604
693	0.865017	0.01165
694	0.866207	0.011853
695	0.867454	0.011933
696	0.8687	0.012033
697	0.870004	0.012378
698	0.871251	0.012752
699	0.872554	0.013068
700	0.873801	0.013566
701	0.875047	0.013946
702	0.876237	0.014381
703	0.877427	0.01482
704	0.878674	0.015265
705	0.879977	0.015718
706	0.88128	0.016211
707	0.882527	0.01663
708	0.883774	0.017016
709	0.885077	0.017479
710	0.886267	0.017824
711	0.887457	0.018195
712	0.888704	0.018647
713	0.889894	0.018962
714	0.891254	0.019451
715	0.892501	0.019875
716	0.893747	0.020277
717	0.895051	0.020688
718	0.896297	0.02105
719	0.897487	0.021435
720	0.898677	0.021699
721	0.89998	0.022021
722	0.901227	0.022437
723	0.90253	0.022975
724	0.903777	0.023327
725	0.905024	0.023776
726	0.906271	0.024189
727	0.907574	0.02459
728	0.908707	0.025026
729	0.909954	0.025336
730	0.911144	0.025715
731	0.912504	0.026054
732	0.913807	0.026528
733	0.914997	0.026916
734	0.916301	0.027224
735	0.917547	0.027506
736	0.918794	0.027811
737	0.919927	0.028135
738	0.921231	0.028518
739	0.922421	0.028781
740	0.923724	0.029234
741	0.925027	0.029589
742	0.926274	0.029933
743	0.927577	0.030443
744	0.928824	0.030838
745	0.930014	0.031109
746	0.931204	0.031528
747	0.932451	0.032005
748	0.933697	0.032255
749	0.935001	0.032848
750	0.936247	0.033157
751	0.937494	0.033512
752	0.93874	0.033825
753	0.940044	0.034117
754	0.941234	0.034376
755	0.942481	0.034694
756	0.943671	0.035016
757	0.944974	0.035409
758	0.946277	0.035672
759	0.947524	0.035943
760	0.948771	0.036172
761	0.950074	0.036441
762	0.951264	0.036749
763	0.952454	0.036997
764	0.953701	0.037463
765	0.954891	0.037546
766	0.956251	0.038021
767	0.957554	0.038452
768	0.958801	0.03869
769	0.960047	0.03902
770	0.961294	0.039308
771	0.962484	0.039603
772	0.963731	0.039905
773	0.964977	0.040257
774	0.966224	0.04056
775	0.967527	0.041221
776	0.973704	0.043973
777	0.979994	0.047555
778	0.986227	0.051038
779	0.992517	0.054624
780	0.998751	0.057885
781	1.00504	0.061032
782	1.01127	0.064454
783	1.01745	0.067633
784	1.02374	0.071144
785	1.02992	0.074022
786	1.03632	0.076814
787	1.0425	0.079478
788	1.04873	0.081853
789	1.05502	0.08442
790	1.0612	0.086685
791	1.06754	0.088858
792	1.07366	0.090646
793	1.08007	0.092307
794	1.0863	0.09378
795	1.09248	0.094714
796	1.09877	0.095746
797	1.105	0.096861
798	1.11129	0.097125
799	1.11747	0.09808
800	1.12381	0.099754
801	1.12999	0.101223
802	1.13622	0.102644
803	1.14251	0.103543
804	1.14869	0.104682
805	1.15504	0.105719
806	1.16127	0.106389
807	1.1675	0.10696
808	1.17379	0.107333
809	1.17997	0.107775
810	1.18626	0.106801
811	1.19244	0.105798
812	1.19878	0.105483
813	1.20502	0.104283
814	1.21119	0.103747
815	1.21748	0.102026
816	1.22372	0.10218
817	1.23001	0.103142
818	1.23624	0.103281
819	1.24253	0.103696
820	1.24876	0.104693
821	1.25494	0.105223
822	1.26129	0.106011
823	1.26741	0.107501
824	1.27381	0.108231
825	1.28004	0.108514
826	1.28628	0.108735
827	1.29245	0.109752
828	1.29869	0.11105
829	1.30503	0.112144
830	1.31121	0.113472
831	1.31756	0.114724
832	1.32379	0.115215
[truncated: 8,795 more rows]

## Sheet: S8_Gr4 raw data
Gr4
Specimen: 1
Number of data points: 1151
Maximum Load point: 1125 Maximum Load: 1.20198 kN
Maximum Extension point: 1151 Maximum Extension: 3.98531 mm
___________________________________________________
1	0	-7.2e-05
2	0.000453	-3e-06
3	0.00238	-0.000107
4	0.00374	-6.9e-05
5	0.004987	2.2e-05
6	0.006177	-2.7e-05
7	0.00748	-1.2e-05
8	0.008783	-4e-05
9	0.009973	2e-06
10	0.011277	-5e-06
11	0.01258	-8.8e-05
12	0.013827	-8e-06
13	0.015017	-1.8e-05
14	0.016263	-8.4e-05
15	0.017453	-5.9e-05
16	0.018813	-5.8e-05
17	0.02006	2.7e-05
18	0.021307	4.9e-05
19	0.022553	-3.3e-05
20	0.023857	-2.9e-05
21	0.025047	-1.5e-05
22	0.026237	-3.3e-05
23	0.027427	3e-06
24	0.02873	1.6e-05
25	0.030033	-2.9e-05
26	0.03128	0
27	0.032527	-4.3e-05
28	0.03383	3.1e-05
29	0.035077	4.7e-05
30	0.036267	-4e-05
31	0.037513	-5.3e-05
32	0.038703	-6.8e-05
33	0.040007	-5.7e-05
34	0.04131	-1.3e-05
35	0.0425	0
36	0.043803	9e-06
37	0.045107	2.1e-05
38	0.046297	1.4e-05
39	0.047543	2.4e-05
40	0.048733	-1.8e-05
41	0.04998	7e-06
42	0.051283	-0.000104
43	0.05253	-5e-05
44	0.053833	3e-06
45	0.05508	1.9e-05
46	0.056327	3.4e-05
47	0.057517	6.4e-05
48	0.058763	1.9e-05
49	0.059953	2.2e-05
50	0.061257	-2.9e-05
51	0.06256	2.5e-05
52	0.063807	-7.9e-05
53	0.065053	-1.8e-05
54	0.066357	-2.9e-05
55	0.067603	-2.5e-05
56	0.068737	1.7e-05
57	0.069983	2.1e-05
58	0.071173	-4.9e-05
59	0.072533	6e-06
60	0.07378	-1.4e-05
61	0.075027	-0.000128
62	0.07633	-4.2e-05
63	0.077633	-5.5e-05
64	0.078823	-5.9e-05
65	0.080013	-3.3e-05
66	0.08126	6.2e-05
67	0.082507	1.6e-05
68	0.08381	-4.7e-05
69	0.085	6e-06
70	0.086303	-1.9e-05
71	0.08755	-1.7e-05
72	0.088853	2.4e-05
73	0.090043	-1.5e-05
74	0.091233	5.7e-05
75	0.09248	-4.5e-05
76	0.093727	0
77	0.095087	2.6e-05
78	0.096277	8.5e-05
79	0.09758	-4e-06
80	0.098827	1e-06
81	0.100073	-1.4e-05
82	0.101263	-1.2e-05
83	0.10251	1.9e-05
84	0.1037	-0.000109
85	0.105003	-4.7e-05
86	0.106307	-7e-06
87	0.107497	2.7e-05
88	0.1088	3.1e-05
89	0.110103	-3.4e-05
90	0.111293	1e-05
91	0.112483	-7e-05
92	0.11373	3.4e-05
93	0.114977	-7e-05
94	0.11628	-5.3e-05
95	0.117527	1e-06
96	0.11883	-1.9e-05
97	0.120077	3.2e-05
98	0.121323	1.6e-05
99	0.122513	5.4e-05
100	0.12376	3.1e-05
101	0.12495	-2.8e-05
102	0.126253	-3.8e-05
103	0.127557	1.9e-05
104	0.128803	9e-06
105	0.13005	-7e-06
106	0.131353	3.2e-05
107	0.1326	1.4e-05
108	0.133733	4.7e-05
109	0.13498	1.6e-05
110	0.136227	-1.8e-05
111	0.13753	9e-06
112	0.138833	-2.8e-05
113	0.14008	-2.3e-05
114	0.141327	-9.5e-05
115	0.142573	3.1e-05
116	0.143763	3.7e-05
117	0.14501	7.9e-05
118	0.146257	4.9e-05
119	0.147503	-2.3e-05
120	0.148807	-2.4e-05
121	0.150053	-9e-05
122	0.1513	-1.9e-05
123	0.152603	2.2e-05
124	0.15385	-4.5e-05
125	0.154983	-1.2e-05
126	0.15623	8.5e-05
127	0.157477	0.000143
128	0.15878	1.6e-05
129	0.160027	4.1e-05
130	0.161273	1e-06
131	0.16252	4.7e-05
132	0.163823	1.7e-05
133	0.16507	-5e-05
134	0.16626	-1.4e-05
135	0.167507	4.4e-05
136	0.168697	4.4e-05
137	0.17	5e-06
138	0.171303	6.7e-05
139	0.17255	-1e-05
140	0.173797	-4.8e-05
141	0.1751	-8.5e-05
142	0.176233	-4.4e-05
143	0.17748	4.6e-05
144	0.178727	-2.7e-05
145	0.18003	1e-06
146	0.181333	-4e-06
147	0.182523	-1.5e-05
148	0.183827	-2.3e-05
149	0.185073	2.1e-05
150	0.18632	-5.4e-05
151	0.18751	-2e-05
152	0.188757	-7.4e-05
153	0.189947	-6.5e-05
154	0.19125	3e-06
155	0.192553	2.1e-05
156	0.193743	3e-06
157	0.195047	3.7e-05
158	0.19635	2.9e-05
159	0.19754	2.4e-05
160	0.19873	1.6e-05
161	0.199977	7e-06
162	0.201223	2e-06
163	0.202527	5.2e-05
164	0.203773	-2e-06
165	0.20502	3.2e-05
166	0.206323	0.000166
167	0.20757	0.000175
168	0.20876	0.00036
169	0.210007	0.00065
170	0.21114	0.000927
171	0.212557	0.001302
172	0.21386	0.001622
173	0.21505	0.002019
174	0.216353	0.002288
175	0.2176	0.002618
176	0.218847	0.003023
177	0.21998	0.003373
178	0.221283	0.003722
179	0.222473	0.004119
180	0.223777	0.004444
181	0.22508	0.0045
182	0.22627	0.004494
183	0.227573	0.004549
184	0.22882	0.004439
185	0.23001	0.004444
186	0.231257	0.004594
187	0.232447	0.004504
188	0.23375	0.004559
189	0.235053	0.004619
190	0.2363	0.004451
191	0.237547	0.004508
192	0.23885	0.004506
193	0.240097	0.00447
194	0.241287	0.004493
195	0.242533	0.00448
196	0.243723	0.004538
197	0.245027	0.00454
198	0.24633	0.004511
199	0.24752	0.004535
200	0.248823	0.004494
201	0.250127	0.004432
202	0.251317	0.004539
203	0.252507	0.004509
204	0.253753	0.004471
205	0.254943	0.004426
206	0.256303	0.004464
207	0.25755	0.004583
208	0.258797	0.004594
209	0.2601	0.004549
210	0.261347	0.004451
211	0.262537	0.00447
212	0.263727	0.004427
213	0.264917	0.004528
214	0.266277	0.004526
215	0.26758	0.004479
216	0.26877	0.004484
217	0.270074	0.004559
218	0.27132	0.004545
219	0.272567	0.004509
220	0.273757	0.004499
221	0.275003	0.004451
222	0.276193	0.004464
223	0.277553	0.004506
224	0.278857	0.004515
225	0.280047	0.004442
226	0.28135	0.004504
227	0.282597	0.004534
228	0.283787	0.004555
229	0.284977	0.004504
230	0.28628	0.004437
231	0.28747	0.004426
232	0.288774	0.004496
233	0.29002	0.004437
234	0.291267	0.004474
235	0.29257	0.004554
236	0.293817	0.004539
237	0.295007	0.004566
238	0.296254	0.004529
239	0.297444	0.004533
240	0.298747	0.00455
241	0.30005	0.004481
242	0.301297	0.004488
243	0.302543	0.004474
244	0.303847	0.004506
245	0.305094	0.004556
246	0.306227	0.004566
247	0.30753	0.004658
248	0.30872	0.004565
249	0.310024	0.004685
250	0.311327	0.004579
251	0.312517	0.004561
252	0.31382	0.004575
253	0.315124	0.0046
254	0.316314	0.004555
255	0.317504	0.004614
256	0.31875	0.004754
257	0.31994	0.004628
258	0.3213	0.004721
259	0.322547	0.004746
260	0.323794	0.004653
261	0.325097	0.004657
262	0.326344	0.004685
263	0.327534	0.004727
264	0.32878	0.004629
265	0.32997	0.004662
266	0.331274	0.004723
267	0.332577	0.004722
268	0.333767	0.00468
269	0.33507	0.004657
270	0.336374	0.004653
271	0.337564	0.004608
272	0.338754	0.004544
273	0.34	0.004634
274	0.34119	0.004581
275	0.34255	0.004664
276	0.343854	0.004723
277	0.345044	0.004657
278	0.34629	0.00464
279	0.347594	0.004613
280	0.348784	0.004579
281	0.35003	0.004545
282	0.351277	0.004624
283	0.352467	0.00446
284	0.35377	0.004588
285	0.355074	0.004496
286	0.35632	0.004607
287	0.357567	0.004618
288	0.358814	0.004536
289	0.360004	0.004516
290	0.36125	0.004498
291	0.36244	0.004518
292	0.363744	0.004513
293	0.365104	0.004486
294	0.366294	0.004476
295	0.367597	0.004461
296	0.368844	0.004451
297	0.37009	0.004516
298	0.37128	0.004446
299	0.372527	0.004471
300	0.373717	0.004391
301	0.37502	0.004481
302	0.376324	0.004459
303	0.37757	0.004439
304	0.378817	0.004389
305	0.38012	0.004417
306	0.381254	0.004495
307	0.3825	0.004566
308	0.383747	0.004578
309	0.384994	0.004608
310	0.386297	0.004516
311	0.387544	0.004546
312	0.388847	0.004481
313	0.390094	0.004533
314	0.39134	0.00457
315	0.39253	0.004615
316	0.393777	0.004524
317	0.394967	0.004609
318	0.39627	0.00453
319	0.397574	0.004536
320	0.39882	0.004513
321	0.400124	0.00446
322	0.40137	0.004485
323	0.40256	0.004489
324	0.40375	0.004504
325	0.404997	0.004529
326	0.406244	0.004504
327	0.407547	0.004574
328	0.408794	0.004513
329	0.41004	0.004508
330	0.411287	0.004499
331	0.41259	0.004427
332	0.41378	0.004399
333	0.415027	0.004434
334	0.416217	0.004389
335	0.41752	0.00437
336	0.418767	0.004397
337	0.420014	0.00443
338	0.421317	0.004485
339	0.422564	0.004518
340	0.42381	0.00444
341	0.425	0.004469
342	0.426247	0.004426
343	0.427437	0.004412
344	0.428797	0.004484
345	0.4301	0.004461
346	0.43129	0.004518
347	0.432594	0.004495
348	0.43384	0.00446
349	0.43503	0.004491
350	0.43622	0.004513
351	0.437467	0.004543
352	0.43877	0.004536
353	0.440074	0.004476
354	0.44132	0.004407
355	0.442567	0.004563
356	0.443814	0.004538
357	0.445117	0.004589
358	0.44625	0.004555
359	0.447497	0.004599
360	0.448687	0.004476
361	0.450047	0.004505
362	0.451294	0.004513
363	0.45254	0.00453
364	0.453844	0.004559
365	0.45509	0.004584
366	0.456337	0.004579
367	0.45747	0.004718
368	0.458774	0.00465
369	0.459964	0.004685
370	0.461324	0.004643
371	0.46257	0.004669
372	0.463817	0.004649
373	0.465064	0.004683
374	0.466367	0.00463
375	0.467557	0.004632
376	0.468747	0.004702
377	0.469937	0.004672
378	0.47124	0.004778
379	0.472544	0.004758
380	0.47379	0.004668
381	0.475037	0.004675
382	0.47634	0.004777
383	0.477587	0.004747
384	0.478777	0.0047
385	0.480024	0.004753
386	0.481157	0.004712
387	0.482517	0.004811
388	0.48382	0.004792
389	0.485067	0.004732
390	0.48637	0.004727
391	0.487617	0.004672
392	0.488807	0.004658
393	0.489997	0.004727
394	0.491244	0.004712
395	0.49249	0.004743
396	0.493794	0.004734
397	0.49504	0.004801
398	0.496287	0.004757
399	0.49759	0.004753
400	0.498837	0.004723
401	0.500027	0.004653
402	0.501274	0.004644
403	0.502407	0.004694
404	0.503767	0.004657
405	0.50507	0.004734
406	0.50626	0.004643
407	0.507564	0.004712
408	0.508867	0.004655
409	0.510057	0.004672
410	0.511247	0.00462
411	0.512494	0.004615
412	0.513684	0.004553
413	0.515044	0.004576
414	0.51629	0.004558
415	0.517537	0.004546
416	0.51884	0.004613
417	0.520144	0.004618
418	0.521334	0.004608
419	0.522524	0.004614
420	0.52377	0.004594
421	0.52496	0.00454
422	0.52632	0.004548
423	0.52751	0.004588
424	0.528814	0.00458
425	0.53006	0.004556
426	0.531364	0.004638
427	0.532497	0.004632
428	0.533744	0.004629
429	0.53499	0.004665
430	0.536294	0.004566
431	0.53754	0.004556
432	0.538787	0.0045
433	0.54009	0.004546
434	0.541337	0.004603
435	0.542584	0.004569
436	0.543717	0.004633
437	0.54502	0.004627
438	0.54621	0.004649
439	0.547514	0.004617
440	0.548817	0.004545
441	0.550064	0.004581
442	0.55131	0.004598
443	0.552614	0.004563
444	0.553804	0.004569
445	0.554994	0.00458
446	0.55624	0.004593
447	0.557487	0.004568
448	0.55879	0.004602
449	0.560037	0.00459
450	0.56134	0.00456
451	0.562587	0.004565
452	0.563834	0.004473
453	0.565024	0.004553
454	0.56627	0.004546
455	0.56746	0.004556
456	0.568764	0.004514
457	0.570067	0.004575
458	0.571314	0.004549
459	0.57256	0.004493
460	0.573807	0.004553
461	0.575054	0.004494
462	0.576244	0.004468
463	0.577547	0.004539
464	0.57868	0.004489
465	0.58004	0.004459
466	0.581344	0.004545
467	0.582534	0.00449
468	0.58378	0.004469
469	0.585084	0.004553
470	0.586274	0.004505
471	0.58752	0.004501
472	0.588767	0.004521
473	0.590014	0.004442
474	0.591317	0.004568
475	0.592564	0.004588
476	0.59381	0.004561
477	0.595057	0.004594
478	0.596304	0.004602
479	0.597494	0.004558
480	0.59874	0.004602
481	0.59993	0.004543
482	0.60129	0.004583
483	0.602537	0.004612
484	0.603784	0.004593
485	0.605087	0.004627
486	0.606334	0.004648
487	0.60758	0.00469
488	0.60877	0.004637
489	0.610017	0.004615
490	0.611207	0.004536
491	0.61251	0.004578
492	0.613814	0.004664
493	0.615004	0.00459
494	0.616307	0.004613
495	0.61761	0.004703
496	0.6188	0.004678
497	0.620047	0.004767
498	0.621237	0.004778
499	0.622484	0.004737
500	0.623787	0.004814
501	0.62509	0.004767
502	0.626337	0.004764
503	0.627584	0.004734
504	0.62883	0.004737
505	0.629964	0.004732
506	0.631267	0.004814
507	0.632457	0.004787
508	0.63376	0.004821
509	0.635064	0.004823
510	0.63631	0.004786
511	0.637614	0.004851
512	0.63886	0.004837
513	0.64005	0.004888
514	0.64124	0.004906
515	0.642487	0.004843
516	0.643734	0.00495
517	0.645037	0.004938
518	0.646284	0.004953
519	0.64753	0.004952
520	0.648834	0.004881
521	0.65008	0.004831
522	0.65127	0.004774
523	0.652517	0.00486
524	0.653707	0.004873
525	0.65501	0.004773
526	0.656314	0.00485
527	0.657504	0.004862
528	0.658807	0.004933
529	0.66011	0.004861
530	0.661357	0.004841
531	0.66249	0.004812
532	0.663794	0.004811
533	0.664984	0.004773
534	0.666287	0.004797
535	0.66759	0.004829
536	0.66878	0.004801
537	0.670084	0.004857
538	0.67133	0.004812
539	0.67252	0.004835
540	0.673767	0.004766
541	0.675014	0.004687
542	0.67626	0.004772
543	0.677564	0.004796
544	0.67881	0.004736
545	0.680057	0.004719
546	0.68136	0.004759
547	0.682607	0.004767
548	0.68374	0.004699
549	0.684987	0.004727
550	0.686177	0.004729
551	0.687537	0.004668
552	0.68884	0.004682
553	0.690087	0.004672
554	0.691334	0.004628
555	0.69258	0.004648
556	0.693827	0.004624
557	0.695017	0.004607
558	0.696264	0.004657
559	0.69751	0.004583
560	0.698814	0.004608
561	0.70006	0.00457
562	0.701307	0.00455
563	0.702554	0.004445
564	0.703857	0.00449
565	0.705047	0.00454
566	0.706237	0.004564
567	0.707427	0.004632
568	0.708787	0.004623
569	0.710034	0.004772
570	0.71128	0.004771
571	0.712584	0.004772
572	0.71383	0.004872
573	0.715077	0.004855
574	0.716267	0.004759
575	0.717514	0.004797
576	0.718704	0.004804
577	0.720007	0.004788
578	0.72131	0.004669
579	0.7225	0.004723
580	0.723804	0.004723
581	0.725107	0.004675
582	0.726297	0.004712
583	0.727487	0.004624
584	0.728734	0.004684
585	0.72998	0.00466
586	0.73134	0.004708
587	0.732587	0.004723
588	0.733834	0.004617
589	0.73508	0.004608
590	0.736327	0.004578
591	0.737517	0.004568
592	0.738764	0.004559
593	0.739954	0.004501
594	0.741257	0.004575
595	0.74256	0.004504
596	0.743807	0.004566
597	0.74511	0.004538
598	0.746357	0.004633
599	0.747547	0.004593
600	0.748737	0.004581
601	0.749984	0.00457
602	0.751174	0.004564
603	0.752534	0.004632
604	0.753837	0.004589
605	0.755027	0.004568
606	0.75633	0.004624
607	0.757577	0.00466
608	0.758824	0.004649
609	0.760014	0.004592
610	0.76126	0.004645
611	0.762507	0.004585
612	0.76381	0.004668
613	0.765057	0.00468
614	0.766304	0.004677
615	0.767607	0.004736
616	0.768854	0.004697
617	0.769987	0.004786
618	0.771234	0.004792
619	0.77248	0.004732
620	0.773784	0.004689
621	0.775087	0.004714
622	0.776277	0.004682
623	0.77758	0.004712
624	0.778827	0.004692
625	0.780074	0.004703
626	0.781264	0.004964
627	0.78251	0.005312
628	0.7837	0.006056
629	0.78506	0.007117
630	0.786307	0.008052
631	0.787554	0.009112
632	0.7888	0.010116
633	0.790104	0.011186
634	0.791294	0.012164
635	0.79254	0.013144
636	0.793787	0.013955
637	0.794977	0.014846
638	0.796281	0.015747
639	0.797527	0.016521
640	0.80376	0.02005
641	0.810107	0.02286
642	0.81617	0.024811
643	0.822574	0.02677
644	0.828807	0.028358
645	0.834984	0.029645
646	0.841274	0.030766
647	0.847507	0.032338
648	0.853854	0.034944
649	0.86003	0.037752
650	0.866321	0.040681
651	0.872611	0.043825
652	0.878731	0.046661
653	0.88502	0.049352
654	0.891197	0.051793
655	0.8976	0.054388
656	0.903777	0.056475
657	0.910011	0.058142
658	0.916301	0.059573
659	0.922477	0.060077
660	0.928824	0.060583
661	0.935001	0.060973
662	0.941347	0.062774
663	0.947524	0.064834
664	0.953757	0.066704
665	0.960047	0.068749
666	0.966281	0.070481
667	0.972571	0.072223
668	0.978747	0.073481
669	0.985094	0.074584
670	0.991327	0.075671
671	0.997504	0.076398
672	1.00379	0.076774
673	1.00997	0.077483
674	1.01637	0.078611
675	1.02255	0.079837
676	1.02878	0.080584
677	1.03507	0.081948
678	1.04125	0.082334
679	1.0476	0.082134
680	1.05372	0.080837
681	1.06012	0.077326
682	1.0663	0.074217
683	1.07253	0.069906
684	1.07882	0.068682
685	1.085	0.069727
686	1.09129	0.070471
687	1.09752	0.071443
688	1.10381	0.072445
689	1.1101	0.073611
690	1.11628	0.073889
691	1.12257	0.07443
692	1.12869	0.07456
693	1.13509	0.07477
694	1.14132	0.075378
695	1.14756	0.076657
696	1.15379	0.076929
697	1.16002	0.077625
698	1.16637	0.078151
699	1.17249	0.079227
700	1.17884	0.080522
701	1.18507	0.082431
702	1.19125	0.083805
703	1.19754	0.085216
704	1.20377	0.087069
705	1.21006	0.089072
706	1.21624	0.09069
707	1.22258	0.092093
708	1.22882	0.093837
709	1.23499	0.095399
710	1.24128	0.09715
711	1.24746	0.098526
712	1.25381	0.099404
713	1.26004	0.100188
714	1.26627	0.100619
715	1.27256	0.101823
716	1.27874	0.102745
717	1.28509	0.103291
718	1.29121	0.103434
719	1.29761	0.103673
720	1.30384	0.103164
721	1.31002	0.102712
722	1.31631	0.10214
723	1.32254	0.102394
724	1.32883	0.10286
725	1.33501	0.103372
726	1.34136	0.103434
727	1.34759	0.105135
728	1.35377	0.106252
729	1.36006	0.106697
730	1.36618	0.106884
731	1.37258	0.108092
732	1.37881	0.109073
733	1.38505	0.109991
734	1.39128	0.110497
735	1.39751	0.110449
736	1.40386	0.111264
737	1.40998	0.11204
738	1.41633	0.113186
739	1.42256	0.114081
740	1.42874	0.114985
741	1.43508	0.116301
742	1.44126	0.116551
743	1.44755	0.117229
744	1.45378	0.118101
745	1.46007	0.119019
746	1.46631	0.119415
747	1.47248	0.120518
748	1.47883	0.121312
749	1.48495	0.121861
750	1.49135	0.122627
751	1.49753	0.124084
752	1.50376	0.1249
753	1.51005	0.124682
754	1.51623	0.125193
755	1.52258	0.12626
756	1.5287	0.126758
757	1.5351	0.126708
758	1.54133	0.127257
759	1.54751	0.128427
760	1.5538	0.129412
761	1.56003	0.130651
762	1.56632	0.130275
763	1.5725	0.130523
764	1.57885	0.131443
765	1.58508	0.132886
766	1.59126	0.132718
767	1.5976	0.132717
768	1.60367	0.131761
769	1.61007	0.131886
770	1.6163	0.132724
771	1.62254	0.132636
772	1.62877	0.133447
773	1.635	0.133027
774	1.64135	0.133174
775	1.64747	0.134382
776	1.65387	0.13503
777	1.66005	0.135227
778	1.66628	0.13442
779	1.67252	0.136418
780	1.67875	0.136143
781	1.68504	0.137302
782	1.69127	0.138179
783	1.69756	0.139519
784	1.70385	0.140586
785	1.71003	0.140792
786	1.71626	0.141151
787	1.72244	0.141125
788	1.72884	0.141
789	1.73508	0.141908
790	1.74125	0.142984
791	1.74754	0.14244
792	1.75378	0.142776
793	1.76007	0.144475
794	1.76624	0.143302
795	1.77259	0.142962
796	1.77877	0.143391
797	1.78494	0.143828
798	1.79129	0.14492
799	1.79747	0.145739
800	1.80381	0.1462
801	1.81005	0.148119
802	1.81634	0.149366
803	1.82257	0.149996
804	1.82875	0.148091
805	1.83509	0.149771
806	1.84116	0.149656
807	1.84762	0.14926
808	1.85385	0.150223
809	1.86003	0.149716
810	1.86626	0.151406
811	1.87255	0.153535
812	1.87878	0.154063
813	1.88502	0.154453
814	1.89131	0.154354
815	1.89754	0.154977
816	1.90372	0.153584
817	1.91006	0.154796
818	1.91624	0.154536
819	1.92259	0.155787
820	1.92876	0.155534
821	1.93505	0.156394
822	1.94134	0.157839
823	1.94746	0.156909
824	1.95381	0.159265
825	1.95993	0.158971
826	1.96633	0.15794
827	1.97251	0.159942
828	1.9788	0.158916
829	1.98503	0.159898
830	1.99121	0.160413
831	1.99761	0.161858
832	2.00373	0.161322
833	2.01008	0.162004
834	2.01632	0.162703
835	2.02249	0.162747
836	2.02884	0.16431
837	2.03501	0.164989
838	2.04136	0.165713
839	2.04754	0.164332
840	2.05383	0.166668
841	2.06006	0.165821
842	2.06629	0.166432
843	2.07258	0.168881
844	2.0787	0.167717
845	2.08511	0.167761
846	2.09129	0.167622
847	2.09752	0.167191
848	2.10375	0.169047
849	2.10998	0.168709
850	2.11633	0.170418
851	2.12251	0.171217
852	2.12886	0.172121
853	2.13509	0.172671
854	2.14127	0.173909
855	2.14756	0.174222
856	2.15373	0.17398
857	2.16002	0.176307
858	2.16626	0.176504
859	2.17254	0.177969
860	2.17883	0.179967
861	2.18501	0.180246
862	2.1913	0.180429
863	2.19742	0.177779
864	2.20388	0.178408
865	2.21006	0.180071
866	2.21624	0.179064
867	2.22258	0.179962
868	2.22876	0.179936
869	2.2351	0.17938
870	2.24128	0.180804
871	2.24763	0.179624
872	2.2538	0.182591
873	2.25998	0.180977
874	2.26633	0.182776
875	2.27245	0.181529
876	2.27885	0.183836
877	2.28503	0.184807
878	2.29132	0.182844
879	2.29755	0.186102
880	2.30378	0.141807
881	2.31007	0.15212
882	2.3162	0.160997
883	2.3226	0.169467
884	2.32883	0.176232
885	2.33501	0.181169
886	2.3413	0.183437
887	2.34748	0.185814
888	2.35377	0.187491
889	2.35994	0.186416
890	2.36634	0.189231
891	2.37258	0.18908
892	2.37875	0.191941
893	2.38504	0.191416
894	2.39128	0.19266
895	2.39757	0.187135
896	2.4038	0.192944
897	2.41009	0.193338
898	2.41633	0.196659
899	2.4225	0.196563
900	2.42879	0.197318
901	2.43497	0.198258
902	2.44131	0.200391
903	2.44755	0.201366
904	2.45372	0.197598
905	2.46007	0.201286
906	2.46625	0.202529
907	2.47259	0.203845
908	2.47871	0.202604
909	2.48506	0.20328
910	2.49135	0.206275
911	2.49753	0.207504
912	2.50382	0.20932
913	2.50994	0.209558
914	2.51634	0.209984
915	2.52252	0.210649
916	2.52881	0.211849
917	2.53504	0.212949
918	2.54122	0.214016
919	2.54762	0.212671
920	2.55369	0.215877
921	2.56014	0.216156
922	2.56627	0.21793
923	2.5725	0.220027
924	2.57873	0.219959
925	2.58502	0.217961
926	2.59131	0.221953
927	2.59749	0.222458
928	2.60384	0.22343
929	2.61007	0.225043
930	2.61625	0.225542
931	2.62254	0.229413
932	2.62877	0.227577
933	2.63506	0.231093
934	2.64129	0.23266
935	2.64384	0.16468
936	2.65002	0.179001
937	2.65631	0.190774
938	2.66249	0.201841
939	2.66883	0.21249
940	2.67501	0.221847
941	2.6813	0.230138
942	2.68759	0.234962
943	2.69371	0.146373
944	2.70011	0.161403
945	2.70629	0.172741
946	2.71252	0.183216
947	2.71881	0.192863
948	2.72499	0.201284
949	2.73134	0.209663
950	2.73746	0.215009
951	2.74386	0.213497
952	2.75009	0.202757
953	2.75627	0.205883
954	2.76256	0.212123
955	2.76873	0.212569
956	2.77508	0.211444
957	2.78132	0.212398
958	2.78761	0.195237
959	2.79378	0.162711
960	2.80002	0.17408
961	2.80625	0.183647
962	2.81254	0.192145
963	2.81877	0.199312
964	2.82506	0.20441
965	2.83129	0.204195
966	2.83753	0.202456
967	2.84376	0.199687
968	2.85005	0.203656
969	2.85623	0.203616
970	2.86258	0.208503
971	2.86886	0.210361
972	2.87499	0.21077
973	2.88128	0.213233
974	2.88751	0.214472
975	2.8938	0.21737
976	2.89997	0.219038
977	2.90632	0.219119
978	2.91261	0.221937
979	2.91873	0.222535
980	2.92508	0.223541
981	2.9312	0.225682
982	2.9376	0.227006
983	2.94378	0.22967
984	2.95001	0.231572
985	2.9563	0.234645
986	2.96248	0.23694
987	2.96882	0.239708
988	2.975	0.242278
989	2.98135	0.245735
990	2.98758	0.248484
991	2.99376	0.250039
992	3.00005	0.253254
993	3.00628	0.256022
994	3.01263	0.258672
995	3.01875	0.26105
996	3.02509	0.263647
997	3.03133	0.266368
998	3.0375	0.26893
999	3.04385	0.272754
1000	3.04997	0.275897
1001	3.05638	0.279429
1002	3.06255	0.282445
1003	3.06879	0.285618
1004	3.07508	0.288839
1005	3.08125	0.291398
1006	3.08754	0.29487
1007	3.09372	0.298226
1008	3.10012	0.301539
1009	3.1063	0.304018
1010	3.11253	0.306362
1011	3.11876	0.30995
1012	3.125	0.312556
1013	3.13135	0.315225
1014	3.13752	0.317906
1015	3.14381	0.320714
1016	3.1501	0.32392
1017	3.15622	0.32709
1018	3.16257	0.330194
1019	3.16869	0.332758
1020	3.17509	0.33573
1021	3.18127	0.338309
1022	3.18756	0.341801
1023	3.19379	0.348172
1024	3.20003	0.353029
1025	3.20637	0.358114
1026	3.21249	0.362638
1027	3.21884	0.3681
1028	3.22507	0.373199
1029	3.23125	0.378249
1030	3.23748	0.383865
1031	3.24377	0.389788
1032	3.25012	0.395619
1033	3.25624	0.400913
1034	3.26259	0.406373
1035	3.26882	0.411782
1036	3.275	0.416879
1037	3.28129	0.423069
1038	3.28746	0.428788
1039	3.29386	0.434623
1040	3.30004	0.439911
1041	3.30627	0.445388
1042	3.31257	0.450308
1043	3.31874	0.454757
1044	3.32509	0.459663
1045	3.33121	0.464196
1046	3.33761	0.469094
1047	3.34379	0.473565
1048	3.34997	0.477809
1049	3.35631	0.482722
1050	3.36249	0.487576
1051	3.36883	0.492775
1052	3.37501	0.497392
1053	3.38136	0.502397
1054	3.38759	0.507127
1055	3.39377	0.512084
1056	3.40006	0.517401
1057	3.40618	0.522327
1058	3.41258	0.527517
1059	3.41882	0.532416
1060	3.42505	0.536525
1061	3.43128	0.540605
1062	3.43751	0.544645
1063	3.4438	0.549466
1064	3.44998	0.553862
1065	3.45633	0.559294
1066	3.46256	0.563931
1067	3.46874	0.56866
1068	3.47503	0.573283
1069	3.48126	0.578015
1070	3.48755	0.58555
1071	3.49378	0.595099
1072	3.50008	0.606366
1073	3.50631	0.618207
1074	3.51249	0.628827
1075	3.51883	0.638955
1076	3.52495	0.647769
1077	3.53136	0.657031
1078	3.53753	0.665444
1079	3.54377	0.675309
1080	3.55005	0.685965
1081	3.55623	0.696277
1082	3.56258	0.706899
1083	3.5687	0.716993
1084	3.5751	0.72805
1085	3.58134	0.73915
1086	3.58751	0.749569
1087	3.59375	0.761023
1088	3.59998	0.773081
1089	3.60633	0.785404
1090	3.6125	0.797476
1091	3.61885	0.810337
1092	3.62508	0.822783
1093	3.63126	0.835069
1094	3.63761	0.848026
1095	3.64367	0.860066
1096	3.65013	0.873205
1097	3.65631	0.885605
1098	3.66254	0.898059
1099	3.66877	0.910495
1100	3.67501	0.922735
1101	3.68135	0.935571
1102	3.68753	0.947307
1103	3.69382	0.960163
1104	3.70005	0.972103
1105	3.70623	0.98405
1106	3.71252	0.996241
1107	3.71875	1.00838
1108	3.72504	1.02045
1109	3.73128	1.03198
1110	3.73757	1.0436
1111	3.74386	1.05483
1112	3.75003	1.06559
1113	3.75632	1.07699
1114	3.76244	1.08781
1115	3.76884	1.09919
1116	3.77502	1.11015
1117	3.78125	1.12118
1118	3.78755	1.13174
1119	3.79378	1.14224
1120	3.80007	1.15327
1121	3.80625	1.16364
1122	3.81259	1.17481
1123	3.81883	1.18527
1124	3.82495	1.19527
1125	3.8288	1.20198
1126	3.83061	0.514429
1127	3.83622	0.55852
1128	3.84251	0.574507
1129	3.84869	0.588729
1130	3.85515	0.602475
1131	3.86133	0.61561
1132	3.86756	0.627368
1133	3.87379	0.639299
1134	3.88003	0.65027
1135	3.88632	0.660935
1136	3.89255	0.670836
1137	3.89884	0.678855
1138	3.90507	0.688554
1139	3.91125	0.698099
1140	3.91754	0.707473
1141	3.92377	0.71653
1142	3.93012	0.725509
1143	3.9363	0.734144
1144	3.94259	0.743006
1145	3.94882	0.751262
1146	3.955	0.759252
1147	3.96129	0.767188
1148	3.96746	0.775287
1149	3.97381	0.783172
1150	3.98004	0.790711
1151	3.98531	0.797312
Specimen: 2
Number of data points: 1161
Maximum Load point: 1157 Maximum Load: 0.98027 kN
Maximum Extension point: 1161 Maximum Extension: 4.01076 mm
___________________________________________________
1	0	-3.7e-05
2	0.00034	4.3e-05
3	0.002323	-1e-05
4	0.00374	-1.6e-05
5	0.004987	-1.2e-05
6	0.006177	-5.1e-05
7	0.007423	1.5e-05
8	0.008727	-5.9e-05
9	0.009973	4.6e-05
10	0.01122	-6.6e-05
11	0.012467	4.9e-05
12	0.01377	5.6e-05
13	0.015073	8.9e-05
14	0.016207	5e-06
15	0.017453	-4.9e-05
16	0.018643	-0.000104
17	0.020003	-1.9e-05
18	0.02125	4e-06
19	0.022497	2.3e-05
20	0.023743	4.4e-05
21	0.025047	2e-05
22	0.026293	3.1e-05
23	0.027483	1.5e-05
24	0.02873	6.9e-05
25	0.02992	-7.4e-05
26	0.031223	2.3e-05
27	0.03247	2.9e-05
28	0.033717	-5.4e-05
29	0.03502	5.6e-05
30	0.036323	-4.1e-05
31	0.037513	3e-06
32	0.038703	5.3e-05
33	0.03995	8.1e-05
34	0.041253	-2e-05
35	0.042557	1.9e-05
36	0.043747	-8.3e-05
37	0.04505	-4.6e-05
38	0.046297	-4.4e-05
39	0.047543	4.3e-05
40	0.048733	2.1e-05
41	0.04998	5.3e-05
42	0.05117	6e-06
43	0.052473	3.5e-05
44	0.053777	4e-06
45	0.055023	-2.9e-05
46	0.056327	-2.6e-05
47	0.057573	-7.3e-05
48	0.058763	-2e-05
49	0.06001	3.6e-05
50	0.061257	-4.1e-05
51	0.062447	-2.4e-05
52	0.06375	9.7e-05
53	0.064997	3.4e-05
54	0.0663	1.9e-05
55	0.067547	-9.8e-05
56	0.06885	-7e-05
57	0.069983	1e-05
58	0.07123	-4.5e-05
59	0.07242	5e-06
60	0.073723	-3.1e-05
61	0.075027	-1.6e-05
62	0.076273	5.4e-05
63	0.07752	2.5e-05
64	0.078823	-2.9e-05
65	0.08007	2.6e-05
66	0.081203	-5e-05
67	0.08245	-1e-06
68	0.08364	-6.4e-05
69	0.085	5.3e-05
70	0.086247	3.1e-05
71	0.087493	4.4e-05
72	0.08874	-9e-06
73	0.090043	4.6e-05
74	0.09129	-6e-06
75	0.09248	-7.6e-05
76	0.093727	-1.6e-05
77	0.094973	-1.9e-05
78	0.096277	-6.3e-05
79	0.097523	1.3e-05
80	0.098827	6.4e-05
81	0.100073	1e-06
82	0.10132	4.3e-05
83	0.10251	3.9e-05
84	0.1037	-3.6e-05
85	0.104947	-2.5e-05
86	0.10625	-4.9e-05
87	0.107553	2.1e-05
88	0.108743	-4.1e-05
89	0.110047	-2e-05
90	0.11135	6e-05
91	0.11254	-4e-06
92	0.11373	5.9e-05
93	0.114977	5.5e-05
94	0.116167	-7.3e-05
95	0.117527	-3.9e-05
96	0.118773	-1.9e-05
97	0.12002	-7e-06
98	0.121267	-1.6e-05
99	0.12257	5.9e-05
100	0.12376	6.5e-05
101	0.12495	-4.1e-05
102	0.126253	5.1e-05
103	0.127443	9e-06
104	0.128747	-2.4e-05
105	0.13005	0
106	0.131297	-2.7e-05
107	0.132543	-3.4e-05
108	0.13379	9e-06
109	0.13498	0.000122
110	0.136227	-2e-05
111	0.137417	4.4e-05
112	0.138777	6.6e-05
113	0.140023	6.5e-05
114	0.14127	-2.6e-05
115	0.142573	1e-06
116	0.14382	-2.1e-05
117	0.145067	-4e-05
118	0.1462	-5.5e-05
119	0.147503	1.8e-05
120	0.148693	3.5e-05
121	0.149997	2.9e-05
122	0.1513	5.5e-05
123	0.15249	1.9e-05
124	0.153793	2.8e-05
125	0.155097	-2.2e-05
126	0.15623	-1e-05
127	0.157477	-2e-05
128	0.158723	5e-05
129	0.15997	-1.2e-05
130	0.161273	4.4e-05
131	0.16252	4e-06
132	0.163823	7e-05
133	0.16507	4.4e-05
134	0.166317	-8.1e-05
135	0.167507	-2.2e-05
136	0.168753	-2.6e-05
137	0.169943	-4.9e-05
138	0.171247	-1e-06
139	0.17255	7.3e-05
140	0.17374	6.6e-05
141	0.175043	3.8e-05
142	0.176347	6e-05
143	0.177537	4.5e-05
144	0.178727	-9.9e-05
145	0.179973	1.9e-05
146	0.181163	-0.000101
147	0.182523	2.9e-05
148	0.18377	2.3e-05
149	0.185017	5.3e-05
150	0.18632	5.5e-05
151	0.187567	6.1e-05
152	0.188757	5.9e-05
153	0.190003	3e-05
154	0.191193	-1.5e-05
155	0.192497	-4e-06
156	0.193743	4.9e-05
157	0.19499	-6e-06
158	0.196293	-5e-06
159	0.19754	2.9e-05
160	0.198787	3.9e-05
161	0.19992	3.5e-05
162	0.201223	8.3e-05
163	0.202413	2.8e-05
164	0.203773	2.4e-05
165	0.20502	6.9e-05
166	0.206267	2.9e-05
167	0.20757	8.4e-05
168	0.208817	8e-06
169	0.210007	0.000112
170	0.211197	-3.6e-05
171	0.212443	6e-05
172	0.213747	3e-05
173	0.214993	9.2e-05
174	0.216297	-4.5e-05
175	0.217543	-3.4e-05
176	0.21879	-1.5e-05
177	0.220093	-2.9e-05
178	0.221227	3.4e-05
179	0.222473	2e-05
180	0.223663	5e-06
181	0.224967	6.3e-05
182	0.22627	6e-05
183	0.227517	1.4e-05
184	0.22882	1.3e-05
185	0.230067	1.5e-05
186	0.231313	8e-06
187	0.232503	-3.9e-05
188	0.233693	2.3e-05
189	0.234883	0.000123
190	0.236243	7.5e-05
191	0.23749	3e-05
192	0.238737	7.1e-05
193	0.24004	8.7e-05
194	0.241343	1.1e-05
195	0.242533	-2.5e-05
196	0.243723	3.1e-05
197	0.244913	-1e-05
198	0.246273	-7e-06
199	0.247577	7.4e-05
200	0.248767	0.000188
201	0.250013	0.000334
202	0.251317	0.000375
203	0.252564	0.000475
204	0.253753	0.000466
205	0.255	0.00061
206	0.256133	0.000808
207	0.257493	0.001104
208	0.258797	0.001383
209	0.260044	0.001656
210	0.261347	0.001947
211	0.262594	0.002205
212	0.263783	0.002313
213	0.264973	0.002247
214	0.26622	0.002253
215	0.267467	0.002614
216	0.26877	0.003099
217	0.270017	0.003361
218	0.271263	0.003647
219	0.272567	0.003823
220	0.273813	0.003869
221	0.275003	0.004146
222	0.27625	0.00416
223	0.277384	0.0044
224	0.278744	0.00442
225	0.280047	0.004464
226	0.281293	0.004479
227	0.282597	0.004444
228	0.283844	0.00442
229	0.285034	0.004465
230	0.286224	0.004455
231	0.287527	0.004454
232	0.28866	0.004505
233	0.29002	0.004494
234	0.291267	0.004474
235	0.292514	0.00444
236	0.29376	0.004447
237	0.295063	0.00448
238	0.29631	0.00441
239	0.297444	0.004498
240	0.298747	0.004552
241	0.299937	0.00446
242	0.301297	0.004543
243	0.302487	0.004419
244	0.30379	0.00447
245	0.305037	0.004439
246	0.306284	0.004449
247	0.307474	0.004419
248	0.30872	0.004457
249	0.30991	0.004492
250	0.311214	0.004455
251	0.312517	0.004492
252	0.313707	0.004561
253	0.31501	0.004594
254	0.316314	0.004405
255	0.31756	0.004457
256	0.318694	0.004474
257	0.31994	0.004393
258	0.32113	0.00436
259	0.32249	0.004523
260	0.323794	0.004518
261	0.32504	0.004472
262	0.326287	0.004519
263	0.32759	0.004517
264	0.32878	0.004438
265	0.32997	0.00443
266	0.331217	0.004459
267	0.332464	0.004425
268	0.333767	0.00446
269	0.335014	0.004513
270	0.33626	0.004479
271	0.337507	0.004493
272	0.33881	0.004479
273	0.34	0.004455
274	0.341247	0.004355
275	0.342437	0.004401
276	0.34374	0.004405
277	0.345044	0.00442
278	0.34629	0.004375
279	0.347537	0.004411
280	0.34884	0.004458
281	0.35003	0.004459
282	0.35122	0.004467
283	0.352524	0.004424
284	0.353714	0.004359
285	0.355017	0.004464
286	0.35632	0.004345
287	0.35751	0.00444
288	0.358814	0.004416
289	0.36006	0.004513
290	0.36125	0.004503
291	0.362497	0.004458
292	0.363744	0.00446
293	0.36499	0.004409
294	0.366294	0.0044
295	0.36754	0.004403
296	0.368787	0.004425
297	0.370034	0.004458
298	0.371337	0.004408
299	0.37247	0.004465
300	0.373717	0.004472
301	0.374907	0.004468
302	0.376267	0.004508
303	0.37757	0.004478
304	0.37876	0.004442
305	0.380064	0.004398
306	0.38131	0.004411
307	0.382557	0.004457
308	0.383747	0.004482
309	0.384994	0.004453
310	0.386184	0.004463
311	0.387487	0.004429
312	0.38879	0.004495
313	0.390037	0.004427
314	0.391284	0.004489
315	0.392587	0.004452
316	0.39372	0.004375
317	0.394967	0.004435
318	0.396214	0.004384
319	0.39746	0.004438
320	0.398764	0.004434
321	0.40001	0.004505
322	0.401314	0.004497
323	0.40256	0.004505
324	0.403807	0.004318
325	0.40494	0.004356
326	0.406244	0.004364
327	0.407434	0.004432
328	0.408794	0.004442
329	0.41004	0.004445
330	0.411287	0.004418
331	0.41259	0.004515
332	0.413837	0.004576
333	0.415027	0.004467
334	0.416217	0.004427
335	0.417464	0.004462
336	0.41871	0.004418
337	0.420014	0.004388
338	0.42126	0.00445
339	0.422507	0.004469
340	0.42381	0.004467
341	0.425057	0.00448
342	0.42619	0.004512
343	0.427494	0.004498
344	0.428684	0.00442
345	0.429987	0.004414
346	0.43129	0.004393
347	0.432537	0.00444
348	0.433784	0.004394
349	0.435087	0.00448
350	0.436334	0.004418
351	0.437467	0.00453
352	0.438714	0.004473
353	0.43996	0.004381
354	0.441264	0.00442
355	0.442567	0.004371
356	0.443814	0.004455
357	0.44506	0.00441
358	0.446307	0.004422
359	0.447497	0.004484
360	0.448744	0.004478
361	0.44999	0.004504
362	0.451237	0.004489
363	0.45254	0.004502
364	0.453787	0.004374
365	0.455034	0.004452
366	0.456337	0.004408
367	0.457584	0.004444
368	0.458717	0.004437
369	0.459964	0.004463
370	0.461154	0.004422
371	0.462514	0.004508
372	0.463817	0.004455
373	0.465064	0.004499
374	0.46631	0.004391
375	0.467557	0.00438
376	0.468804	0.004467
377	0.469994	0.004433
378	0.47124	0.004447
379	0.47243	0.004439
380	0.47379	0.004447
381	0.475037	0.00446
382	0.476284	0.004469
383	0.47753	0.004427
384	0.478834	0.00441
385	0.480024	0.004467
386	0.48127	0.004469
387	0.482404	0.004457
388	0.483707	0.004465
389	0.48501	0.004477
390	0.486257	0.004453
391	0.48756	0.004473
392	0.488807	0.004518
393	0.490054	0.004478
394	0.491244	0.004395
395	0.49249	0.004378
396	0.49368	0.004358
397	0.49504	0.004396
398	0.496287	0.004418
399	0.497477	0.004419
400	0.498837	0.004423
401	0.500084	0.004538
402	0.501274	0.004453
403	0.502464	0.004502
404	0.50371	0.004435
405	0.504957	0.004391
406	0.50626	0.004394
407	0.507564	0.004394
408	0.50881	0.00448
409	0.510057	0.00448
410	0.511304	0.004469
411	0.512494	0.004475
412	0.51374	0.004482
413	0.51493	0.00445
414	0.51629	0.00441
415	0.517537	0.0045
416	0.518727	0.004563
417	0.52003	0.004414
418	0.521334	0.004489
419	0.52258	0.004504
420	0.523714	0.004502
421	0.52496	0.004518
422	0.526207	0.004579
423	0.52751	0.004447
424	0.528757	0.004422
425	0.530004	0.00451
426	0.531307	0.004444
427	0.532554	0.004475
428	0.5338	0.004478
429	0.53499	0.004459
430	0.536237	0.004513
431	0.537484	0.004477
432	0.538787	0.004463
433	0.540034	0.0045
434	0.54128	0.004465
435	0.542584	0.004445
436	0.54383	0.004423
437	0.544964	0.004403
438	0.54621	0.004429
439	0.547457	0.004552
440	0.548704	0.004508
441	0.550064	0.004429
442	0.551254	0.004472
443	0.552557	0.004479
444	0.55386	0.004378
445	0.55505	0.004413
446	0.556184	0.004404
447	0.557487	0.00444
448	0.558677	0.00441
449	0.55998	0.004509
450	0.561284	0.004482
451	0.56253	0.00444
452	0.563777	0.004562
453	0.56508	0.004463
454	0.56627	0.004444
455	0.56746	0.004399
456	0.568707	0.004438
457	0.569954	0.004437
458	0.571314	0.004434
459	0.572504	0.004487
460	0.573807	0.004439
461	0.575054	0.004475
462	0.5763	0.004498
463	0.57749	0.004444
464	0.578737	0.004411
465	0.579927	0.004418
466	0.58123	0.00448
467	0.58259	0.004455
468	0.58378	0.004463
469	0.585027	0.004468
470	0.58633	0.004479
471	0.58752	0.004484
472	0.58871	0.004469
473	0.589957	0.004453
474	0.591204	0.004346
475	0.592507	0.004483
476	0.59381	0.0044
477	0.595	0.004422
478	0.596304	0.004422
479	0.59755	0.004546
480	0.59874	0.004485
481	0.599987	0.004444
482	0.601234	0.004509
483	0.60248	0.004473
484	0.603784	0.004463
485	0.60503	0.004427
486	0.606334	0.004437
487	0.60758	0.004463
488	0.608827	0.004469
489	0.60996	0.004515
490	0.611207	0.004518
491	0.612454	0.004517
492	0.613757	0.00451
493	0.61506	0.004529
494	0.616307	0.004494
495	0.617554	0.004465
496	0.618857	0.004414
497	0.620047	0.004478
498	0.621237	0.004467
499	0.622484	0.004498
500	0.623674	0.004411
501	0.625034	0.004512
502	0.62628	0.004529
503	0.627527	0.004473
504	0.62883	0.004482
505	0.630077	0.004515
506	0.63121	0.004467
507	0.632457	0.004477
508	0.633704	0.004409
509	0.635007	0.004523
510	0.636254	0.00446
511	0.6375	0.004497
512	0.638804	0.004561
513	0.64005	0.004557
514	0.641297	0.004504
515	0.642487	0.004538
516	0.643734	0.004518
517	0.644924	0.004454
518	0.646227	0.004492
519	0.64753	0.004609
520	0.648777	0.004497
521	0.65008	0.004534
522	0.651327	0.004539
523	0.652517	0.004502
524	0.653707	0.004464
525	0.654954	0.004523
526	0.6562	0.004443
527	0.65756	0.004477
528	0.658807	0.004543
529	0.660054	0.004571
530	0.6613	0.004507
531	0.662604	0.004523
532	0.663737	0.004568
533	0.664984	0.004512
534	0.666117	0.004503
535	0.667477	0.004574
536	0.66878	0.004518
537	0.670027	0.004524
538	0.671274	0.004474
539	0.672577	0.004604
540	0.673824	0.004587
541	0.674957	0.004584
542	0.676204	0.004621
543	0.67745	0.004539
544	0.678754	0.004549
545	0.680057	0.004508
546	0.681304	0.004533
547	0.68255	0.004549
548	0.683854	0.004544
549	0.684987	0.004587
550	0.686234	0.004573
551	0.687424	0.004546
552	0.688727	0.004567
553	0.69003	0.004606
554	0.691277	0.004524
555	0.692524	0.004462
556	0.693827	0.004482
557	0.695074	0.004537
558	0.696264	0.004517
559	0.69751	0.004633
560	0.698644	0.004578
561	0.700004	0.004613
562	0.701307	0.004652
563	0.702497	0.004583
564	0.7038	0.004583
565	0.705104	0.004522
566	0.706294	0.004524
567	0.707484	0.00453
568	0.70873	0.004493
569	0.709977	0.004547
570	0.71128	0.004593
571	0.712527	0.004552
572	0.71383	0.004552
573	0.715077	0.004632
574	0.716324	0.004504
575	0.717514	0.004534
576	0.718704	0.004484
577	0.719894	0.004475
578	0.721254	0.004556
579	0.722557	0.004602
580	0.723747	0.004513
581	0.724994	0.004532
582	0.726354	0.004548
583	0.727544	0.004591
584	0.728734	0.004568
585	0.72998	0.004532
586	0.73117	0.00441
587	0.732474	0.004546
588	0.733777	0.004505
589	0.735024	0.004581
590	0.736327	0.004667
591	0.737574	0.004624
592	0.738764	0.00451
593	0.74001	0.004573
594	0.741257	0.004562
595	0.742447	0.0045
596	0.743751	0.004574
597	0.744997	0.004548
598	0.746244	0.004507
599	0.747547	0.004556
600	0.748794	0.004611
601	0.749984	0.004493
602	0.75123	0.004619
603	0.75242	0.004602
604	0.753724	0.00451
605	0.755027	0.004567
606	0.756274	0.004552
607	0.757577	0.004579
608	0.758824	0.004619
609	0.76007	0.004619
610	0.761204	0.004588
611	0.762507	0.004627
612	0.76364	0.004617
613	0.765	0.004579
614	0.766304	0.004527
615	0.767494	0.004613
616	0.76874	0.004587
617	0.7701	0.004535
618	0.77129	0.004494
619	0.77248	0.004604
620	0.773727	0.004544
621	0.774917	0.004574
622	0.776277	0.004642
623	0.777524	0.004559
624	0.778771	0.004487
625	0.780074	0.004566
626	0.781321	0.004533
627	0.78251	0.004553
628	0.783757	0.004559
629	0.784947	0.004579
630	0.786251	0.004551
631	0.787554	0.004606
632	0.788744	0.004586
633	0.790047	0.004636
634	0.79135	0.004513
635	0.79254	0.004474
636	0.79373	0.004519
637	0.794977	0.004465
638	0.796167	0.004504
639	0.797527	0.004561
640	0.798774	0.004571
641	0.80002	0.004592
642	0.801267	0.004535
643	0.802571	0.004576
644	0.808747	0.004564
645	0.81498	0.004574
646	0.821271	0.004452
647	0.827504	0.004539
648	0.833794	0.004504
649	0.839971	0.004589
650	0.846317	0.004524
651	0.852551	0.005108
652	0.858727	0.005414
653	0.865017	0.007218
654	0.871194	0.010047
655	0.877541	0.013123
656	0.883774	0.015921
657	0.890007	0.018916
658	0.896297	0.021631
659	0.902474	0.024312
660	0.908821	0.026813
661	0.914941	0.028925
662	0.921344	0.03104
663	0.92752	0.032824
664	0.933754	0.03442
665	0.940044	0.036042
666	0.946221	0.037453
667	0.952567	0.039024
668	0.958744	0.040975
669	0.965034	0.043529
670	0.971267	0.046415
671	0.977501	0.049467
672	0.983734	0.052608
673	0.989911	0.055919
674	0.996257	0.059211
675	1.00255	0.062693
676	1.00878	0.065876
677	1.01501	0.068921
678	1.02125	0.071444
679	1.02759	0.073934
680	1.03366	0.075827
681	1.04006	0.077981
682	1.04629	0.079949
683	1.05247	0.081734
684	1.05876	0.083618
685	1.06499	0.085371
686	1.07128	0.086892
687	1.07746	0.088359
688	1.08381	0.088271
689	1.09004	0.089439
690	1.09622	0.09098
691	1.10256	0.093039
692	1.10868	0.094822
693	1.11509	0.096764
694	1.12126	0.098577
695	1.1275	0.100249
696	1.13379	0.102064
697	1.13996	0.104
698	1.14631	0.105838
699	1.15243	0.107617
700	1.15883	0.109685
701	1.16501	0.11143
702	1.17124	0.112963
703	1.17748	0.114783
704	1.18371	0.116299
705	1.19006	0.118015
706	1.19623	0.119227
707	1.20252	0.119982
708	1.20876	0.120318
709	1.21499	0.120288
710	1.22128	0.119216
711	1.22746	0.118421
712	1.23386	0.117568
713	1.23998	0.117145
714	1.24627	0.113928
715	1.25256	0.111714
716	1.25874	0.112004
717	1.26503	0.113526
718	1.27115	0.114866
719	1.27755	0.115957
720	1.28378	0.116429
721	1.28996	0.116299
722	1.29625	0.117088
723	1.30248	0.116807
724	1.30883	0.114711
725	1.31501	0.113104
726	1.3213	0.106262
727	1.32753	0.07042
728	1.33371	0.071783
729	1.34	0.073928
730	1.34612	0.075935
731	1.35258	0.077449
732	1.35875	0.079444
733	1.36499	0.081169
734	1.37128	0.082949
735	1.37745	0.084969
736	1.3838	0.087181
737	1.38992	0.089413
738	1.39632	0.091739
739	1.40256	0.093489
740	1.40873	0.095063
741	1.41502	0.097007
742	1.4212	0.098428
743	1.42755	0.099844
744	1.43372	0.101267
745	1.44007	0.102754
746	1.44625	0.104803
747	1.45248	0.106553
748	1.45883	0.107788
749	1.46495	0.10875
750	1.47135	0.110094
751	1.47753	0.111067
752	1.48376	0.110948
753	1.49005	0.112192
754	1.49623	0.112559
755	1.50257	0.113744
756	1.50869	0.114699
757	1.5151	0.114663
758	1.52127	0.115865
759	1.52751	0.115451
760	1.5338	0.116329
761	1.53997	0.117789
762	1.54626	0.117469
763	1.5525	0.118037
764	1.55879	0.118595
765	1.56513	0.120011
766	1.5712	0.119994
767	1.57754	0.121329
768	1.58366	0.121612
769	1.59007	0.121973
770	1.59624	0.123639
771	1.60253	0.124497
772	1.60877	0.125614
773	1.61494	0.125883
774	1.62135	0.125941
775	1.62747	0.127841
776	1.63381	0.12736
777	1.64005	0.128554
778	1.64622	0.128936
779	1.65251	0.130434
780	1.65875	0.132036
781	1.66504	0.132932
782	1.67121	0.134181
783	1.67756	0.135695
784	1.68379	0.134687
785	1.68997	0.136026
786	1.69626	0.137719
787	1.70244	0.136591
788	1.70884	0.138606
789	1.71502	0.140847
790	1.72125	0.142564
791	1.72754	0.142055
792	1.73372	0.141883
793	1.74006	0.143798
794	1.74618	0.144407
795	1.75259	0.146382
796	1.75876	0.14848
797	1.76494	0.150125
798	1.77129	0.147309
799	1.77746	0.148548
800	1.78381	0.150378
801	1.78999	0.151368
802	1.79633	0.152413
803	1.80257	0.153495
804	1.80874	0.154506
805	1.81503	0.156316
806	1.82115	0.158072
807	1.82756	0.15985
808	1.83379	0.160012
809	1.84002	0.160197
810	1.84626	0.162462
811	1.85249	0.164457
812	1.85884	0.164907
813	1.86496	0.164615
814	1.8713	0.167063
815	1.87754	0.167288
816	1.88371	0.166061
817	1.89	0.167194
818	1.89624	0.167299
819	1.90253	0.168236
820	1.9087	0.167956
821	1.91505	0.16877
822	1.92123	0.167584
823	1.92746	0.16752
824	1.93381	0.169461
825	1.93993	0.169346
826	1.94633	0.170373
827	1.95251	0.171166
828	1.95874	0.172967
829	1.96503	0.173546
830	1.97121	0.175262
831	1.97755	0.176103
832	1.98368	0.174242
833	1.99008	0.177792
834	1.99631	0.178041
835	2.00249	0.180197
836	2.00878	0.182831
837	2.01496	0.185182
838	2.0213	0.186171
[truncated: 10,325 more rows]

## Sheet: S9_Gr5 raw data
Gr5
Specimen: 1
Maximum Load point: 1070 Maximum Load: 0.43768 kN
Maximum Extension point: 1121 Maximum Extension: 3.86303 mm
___________________________________________________
1	0	-0.000111
2	0.000397	-0.000153
3	0.00238	-0.000231
4	0.003683	-0.000274
5	0.004987	-0.00022
6	0.006177	-0.000176
7	0.00748	-7.7e-05
8	0.008783	-0.000182
9	0.01003	-0.000136
10	0.011277	-0.000104
11	0.01258	-0.000247
12	0.01377	-0.000235
13	0.01496	-0.000217
14	0.016207	-0.000191
15	0.01751	-0.000247
16	0.018757	-0.000137
17	0.020003	-0.000158
18	0.02125	-0.000139
19	0.022497	-7.1e-05
20	0.0238	-0.000124
21	0.02499	-0.000205
22	0.026237	-0.000155
23	0.027427	-0.000216
24	0.02873	-0.00023
25	0.030033	-0.000163
26	0.03128	-0.00019
27	0.032527	-0.000137
28	0.03383	-9.4e-05
29	0.03502	-7.2e-05
30	0.03621	-0.000197
31	0.037513	-0.000155
32	0.038703	-0.000225
33	0.040007	-0.000175
34	0.041253	-0.000165
35	0.0425	-0.000171
36	0.043803	-0.000142
37	0.04505	-9.6e-05
38	0.04624	-0.00016
39	0.047487	-0.000156
40	0.048677	-9.6e-05
41	0.04998	-0.000152
42	0.051283	-0.00016
43	0.05253	-0.000225
44	0.053777	-0.000167
45	0.05508	-0.000188
46	0.056327	-4.9e-05
47	0.057517	-0.000156
48	0.058763	-0.000122
49	0.059897	-0.000131
50	0.061257	-0.000139
51	0.06256	-0.000192
52	0.06375	-0.000157
53	0.065053	-0.000232
54	0.066357	-0.000203
55	0.06749	-0.00021
56	0.068737	-0.000142
57	0.069983	-4.8e-05
58	0.07123	-0.000165
59	0.072533	-5.9e-05
60	0.07378	-0.000152
61	0.075027	-0.000213
62	0.07633	-0.00016
63	0.077577	-0.000201
64	0.078767	-0.000133
65	0.079957	-0.000192
66	0.081147	-0.00015
67	0.082507	-0.000117
68	0.08381	-9.4e-05
69	0.085057	-0.000165
70	0.086303	-7.9e-05
71	0.08755	-0.000218
72	0.088797	-0.000136
73	0.089987	-0.000227
74	0.091233	-0.000248
75	0.092423	-0.000295
76	0.093783	-0.000121
77	0.09503	-0.000102
78	0.096277	-8.2e-05
79	0.09758	-0.000101
80	0.098827	-0.000118
81	0.100017	-0.000216
82	0.101207	-0.000196
83	0.102397	-0.000193
84	0.103757	-0.00027
85	0.10506	-0.000196
86	0.106307	-0.000119
87	0.107553	-2.9e-05
88	0.108857	-0.000139
89	0.110047	-6.6e-05
90	0.111237	-7.3e-05
91	0.112483	-0.000269
92	0.113673	-0.000205
93	0.115033	-0.000176
94	0.11628	-0.000218
95	0.117527	-0.00026
96	0.11883	-0.000111
97	0.120077	-8.2e-05
98	0.121267	-6.7e-05
99	0.122457	-0.000181
100	0.123703	-9.3e-05
101	0.12495	-0.000238
102	0.126253	-0.000201
103	0.1275	-0.00028
104	0.128803	-0.000223
105	0.13005	-0.000223
106	0.131353	-0.000196
107	0.132487	-6.4e-05
108	0.133733	-0.000131
109	0.134923	-0.000136
110	0.136283	-8.8e-05
111	0.137587	-0.000221
112	0.138777	-0.00022
113	0.14008	-0.00016
114	0.141327	-0.000108
115	0.142573	-0.000235
116	0.143763	-0.000158
117	0.144953	-6.8e-05
118	0.146143	-0.000185
119	0.147503	-0.000103
120	0.148807	-0.000202
121	0.149997	-0.000177
122	0.1513	-0.000218
123	0.152603	-0.000146
124	0.153793	-0.000188
125	0.154983	-0.00017
126	0.15623	-0.000106
127	0.157477	-8.2e-05
128	0.15878	-0.000147
129	0.160027	-0.000218
130	0.161273	-0.000131
131	0.162577	-0.000156
132	0.163823	-0.000119
133	0.165013	-0.000221
134	0.16626	-0.000314
135	0.16745	-0.00018
136	0.168753	-0.000143
137	0.170057	-5.1e-05
138	0.171247	-0.000182
139	0.17255	-0.000136
140	0.173853	-9.3e-05
141	0.175043	-0.000241
142	0.176233	-0.000228
143	0.17748	-0.000215
144	0.17867	-0.000232
145	0.18003	-0.000131
146	0.181277	-0.000131
147	0.182467	-9.2e-05
148	0.18377	-0.000119
149	0.185073	-0.00016
150	0.186263	-6.6e-05
151	0.187453	-0.000198
152	0.188757	-0.000206
153	0.189947	-0.000221
154	0.19125	-0.000223
155	0.192497	-0.000221
156	0.1938	-0.000137
157	0.195103	-9.4e-05
158	0.196293	-7.3e-05
159	0.197483	-0.000114
160	0.19873	-9.9e-05
161	0.19992	-0.000181
162	0.201223	-0.000203
163	0.202527	-0.000192
164	0.203773	-0.000143
165	0.20502	-0.000153
166	0.206323	-0.000119
167	0.20757	-0.000129
168	0.20876	-8.7e-05
169	0.210007	-9.6e-05
170	0.211197	-0.000136
171	0.212557	-0.000138
172	0.213803	-0.000208
173	0.21505	-0.000136
174	0.216297	-0.000183
175	0.2176	-0.00021
176	0.21879	-9.6e-05
177	0.21998	-0.000106
178	0.221227	-0.000138
179	0.222473	-0.000122
180	0.223777	-0.000188
181	0.225023	-0.000102
182	0.226327	-0.000282
183	0.227573	-0.000255
184	0.22882	-0.000211
185	0.23001	-3.9e-05
186	0.231257	0.000284
187	0.23239	0.000517
188	0.23375	0.000603
189	0.235053	0.000613
190	0.2363	0.000715
191	0.237547	0.000837
192	0.238793	0.001033
193	0.24004	0.001119
194	0.24123	0.00134
195	0.242477	0.001556
196	0.243667	0.001858
197	0.24497	0.002012
198	0.246273	0.002116
199	0.24752	0.002091
200	0.248823	0.002338
201	0.25007	0.002518
202	0.251203	0.002521
203	0.25245	0.002545
204	0.253753	0.003296
205	0.255	0.003664
206	0.256247	0.004199
207	0.257493	0.004353
208	0.25874	0.004347
209	0.260044	0.004316
210	0.26129	0.004341
211	0.26248	0.004222
212	0.263783	0.004194
213	0.264917	0.004211
214	0.266277	0.004184
215	0.26758	0.004269
216	0.26877	0.004274
217	0.270074	0.004294
218	0.27132	0.004362
219	0.27251	0.004247
220	0.2737	0.004352
221	0.275003	0.004278
222	0.276193	0.004148
223	0.277553	0.004229
224	0.2788	0.004243
225	0.280047	0.004292
226	0.281293	0.004345
227	0.282597	0.004367
228	0.28373	0.004376
229	0.284977	0.004286
230	0.286167	0.004325
231	0.287527	0.004274
232	0.28883	0.004266
233	0.29002	0.004212
234	0.291324	0.004222
235	0.29257	0.004269
236	0.293817	0.00432
237	0.29495	0.004343
238	0.296254	0.004316
239	0.297444	0.004287
240	0.298747	0.004286
241	0.30005	0.004257
242	0.30124	0.004281
243	0.302543	0.004277
244	0.303847	0.004203
245	0.305037	0.004284
246	0.306227	0.004326
247	0.307474	0.004357
248	0.30872	0.004332
249	0.310024	0.004307
250	0.31127	0.004233
251	0.312517	0.004321
252	0.31382	0.004229
253	0.315067	0.004211
254	0.3162	0.004273
255	0.317504	0.004283
256	0.318637	0.004351
257	0.319997	0.004355
258	0.3213	0.004298
259	0.322547	0.004304
260	0.32385	0.004308
261	0.325097	0.004273
262	0.326287	0.004236
263	0.327477	0.004231
264	0.328724	0.004259
265	0.32997	0.004234
266	0.331274	0.004249
267	0.332577	0.004332
268	0.333767	0.004411
269	0.33507	0.004286
270	0.336317	0.004351
271	0.337507	0.004283
272	0.338754	0.004221
273	0.339944	0.004316
274	0.341247	0.004177
275	0.34255	0.004266
276	0.34374	0.00434
277	0.345044	0.004298
278	0.346347	0.004358
279	0.347537	0.004307
280	0.348727	0.004342
281	0.349974	0.004202
282	0.351164	0.004229
283	0.352524	0.004222
284	0.353827	0.004227
285	0.355017	0.004192
286	0.35632	0.004309
287	0.357567	0.004395
288	0.358814	0.004331
289	0.360004	0.004222
290	0.36125	0.004297
291	0.362497	0.004271
292	0.3638	0.004236
293	0.365047	0.004256
294	0.366294	0.004221
295	0.367597	0.004246
296	0.368844	0.004287
297	0.369977	0.004345
298	0.371224	0.004376
299	0.372414	0.004317
300	0.373774	0.004298
301	0.37502	0.004226
302	0.376267	0.004252
303	0.37757	0.004259
304	0.378817	0.004244
305	0.380064	0.004254
306	0.381254	0.004336
307	0.3825	0.004403
308	0.38369	0.00433
309	0.38505	0.004313
310	0.386297	0.004352
311	0.387544	0.004299
312	0.388847	0.004282
313	0.390094	0.004233
314	0.391284	0.004208
315	0.392474	0.004231
316	0.39372	0.004317
317	0.394967	0.004272
318	0.396327	0.004317
319	0.397517	0.004266
320	0.398764	0.004282
321	0.400067	0.004264
322	0.401314	0.004273
323	0.402504	0.004189
324	0.403694	0.004134
325	0.40494	0.004177
326	0.4063	0.004313
327	0.407547	0.00436
328	0.408794	0.004263
329	0.41004	0.004366
330	0.411344	0.004294
331	0.412534	0.004262
332	0.413724	0.004247
333	0.415027	0.004254
334	0.41616	0.004224
335	0.41752	0.004243
336	0.418767	0.00437
337	0.420014	0.004363
338	0.421317	0.004273
339	0.422564	0.004366
340	0.423754	0.004327
341	0.424944	0.004135
342	0.426247	0.004249
343	0.427437	0.004124
344	0.428797	0.004277
345	0.430044	0.004227
346	0.43129	0.004342
347	0.432537	0.004301
348	0.43384	0.004343
349	0.434974	0.004362
350	0.43622	0.004343
351	0.43741	0.004224
352	0.43877	0.004236
353	0.440074	0.004293
354	0.441264	0.004266
355	0.442567	0.004267
356	0.443814	0.004397
357	0.44506	0.004432
358	0.44625	0.004392
359	0.447497	0.004383
360	0.448687	0.004277
361	0.450047	0.004261
362	0.45135	0.004315
363	0.45254	0.004332
364	0.453787	0.004271
365	0.45509	0.004261
366	0.45628	0.004304
367	0.45747	0.004271
368	0.458717	0.004289
369	0.459964	0.004327
370	0.461267	0.004318
371	0.46257	0.004288
372	0.463817	0.004272
373	0.465064	0.004264
374	0.46631	0.004219
375	0.4675	0.004254
376	0.468747	0.004347
377	0.469937	0.00439
378	0.47124	0.004271
379	0.4726	0.004322
380	0.47379	0.004263
381	0.475037	0.004238
382	0.47634	0.004286
383	0.47753	0.004267
384	0.47872	0.004239
385	0.479967	0.004294
386	0.481214	0.004213
387	0.482517	0.004412
388	0.483764	0.004332
389	0.485067	0.004327
390	0.486314	0.004325
391	0.48756	0.004298
392	0.48875	0.004248
393	0.489997	0.004193
394	0.491187	0.004197
395	0.49249	0.004264
396	0.493794	0.004309
397	0.49504	0.004342
398	0.496287	0.004322
399	0.497534	0.004417
400	0.498837	0.00441
401	0.49997	0.004221
402	0.501217	0.004233
403	0.502464	0.004227
404	0.503767	0.004253
405	0.50507	0.004283
406	0.50626	0.004332
407	0.507564	0.00435
408	0.50881	0.004277
409	0.510057	0.004269
410	0.511247	0.004365
411	0.512494	0.004209
412	0.51374	0.004234
413	0.515044	0.004159
414	0.51629	0.004155
415	0.517537	0.004229
416	0.51884	0.004304
417	0.520087	0.004325
418	0.52122	0.004398
419	0.522467	0.004325
420	0.523657	0.004278
421	0.525017	0.004147
422	0.52632	0.004231
423	0.52751	0.004217
424	0.528814	0.004207
425	0.53006	0.004163
426	0.531307	0.004244
427	0.532497	0.00432
428	0.533744	0.004299
429	0.534934	0.004238
430	0.536294	0.004232
431	0.53754	0.004193
432	0.538787	0.004263
433	0.540034	0.004158
434	0.541337	0.004128
435	0.542527	0.004223
436	0.543717	0.004307
437	0.544964	0.00433
438	0.546267	0.004228
439	0.54757	0.004301
440	0.548817	0.004274
441	0.550064	0.004269
442	0.55131	0.004212
443	0.552557	0.004241
444	0.553747	0.004196
445	0.554994	0.004204
446	0.556184	0.004299
447	0.557544	0.004261
448	0.558847	0.00434
449	0.560037	0.004276
450	0.56134	0.00434
451	0.562587	0.004196
452	0.563777	0.004242
453	0.564967	0.004187
454	0.566214	0.004177
455	0.56746	0.004202
456	0.568764	0.004358
457	0.57001	0.004343
458	0.571314	0.004284
459	0.57256	0.004296
460	0.573807	0.004289
461	0.574997	0.004196
462	0.576244	0.004217
463	0.577434	0.004204
464	0.578737	0.004144
465	0.58004	0.004263
466	0.581287	0.004316
467	0.58259	0.004335
468	0.583837	0.004345
469	0.585084	0.004309
470	0.586217	0.004266
471	0.587464	0.004273
472	0.58871	0.00417
473	0.590014	0.004224
474	0.59126	0.00432
475	0.592507	0.004262
476	0.59381	0.004317
477	0.595057	0.004303
478	0.596304	0.004284
479	0.597494	0.004293
480	0.59874	0.004256
481	0.599987	0.004247
482	0.60129	0.004284
483	0.602537	0.004251
484	0.603784	0.004312
485	0.605087	0.004247
486	0.606334	0.004309
487	0.607524	0.004386
488	0.608714	0.004343
489	0.609904	0.004332
490	0.611264	0.004268
491	0.612567	0.004253
492	0.613757	0.004281
493	0.61506	0.004256
494	0.616364	0.004223
495	0.617554	0.004182
496	0.618744	0.004261
497	0.61999	0.004398
498	0.62118	0.004421
499	0.622484	0.004254
500	0.623787	0.004269
501	0.624977	0.004241
502	0.62628	0.004246
503	0.627584	0.004259
504	0.628774	0.004274
505	0.629964	0.004253
506	0.631267	0.00433
507	0.632457	0.00446
508	0.633817	0.004355
509	0.635007	0.004327
510	0.63631	0.004356
511	0.637557	0.004212
512	0.638804	0.004202
513	0.639994	0.004212
514	0.64124	0.004243
515	0.64243	0.004246
516	0.643734	0.004351
517	0.645037	0.004316
518	0.646284	0.004396
519	0.647587	0.004371
520	0.648834	0.00438
521	0.65008	0.004298
522	0.651214	0.004321
523	0.65246	0.004294
524	0.65365	0.004219
525	0.65501	0.004352
526	0.656257	0.004407
527	0.657504	0.004393
528	0.658807	0.004437
529	0.66011	0.004365
530	0.661244	0.004474
531	0.66249	0.004264
532	0.663737	0.004358
533	0.664984	0.004243
534	0.666344	0.004293
535	0.667534	0.004216
536	0.668837	0.004337
537	0.670027	0.004382
538	0.67133	0.0044
539	0.67252	0.004416
540	0.67371	0.004284
541	0.6749	0.004348
542	0.67626	0.004351
543	0.677564	0.004299
544	0.678754	0.004346
545	0.680057	0.004284
546	0.681304	0.004391
547	0.68255	0.00436
548	0.68374	0.004375
549	0.684987	0.004427
550	0.686177	0.004371
551	0.687537	0.004308
552	0.688784	0.004249
553	0.69003	0.004351
554	0.691334	0.004247
555	0.69258	0.004309
556	0.69377	0.004315
557	0.69496	0.004388
558	0.696264	0.004336
559	0.697454	0.004416
560	0.698757	0.00445
561	0.70006	0.004318
562	0.701307	0.004239
563	0.702554	0.004341
564	0.7038	0.004298
565	0.70499	0.004289
566	0.706237	0.004371
567	0.707427	0.004342
568	0.70873	0.004395
569	0.710034	0.004382
570	0.71128	0.004302
571	0.712527	0.004246
572	0.71383	0.004358
573	0.71502	0.004304
574	0.71621	0.004277
575	0.717514	0.00432
576	0.718704	0.004377
577	0.720007	0.004358
578	0.72131	0.004412
579	0.722557	0.004346
580	0.723804	0.004311
581	0.725107	0.00437
582	0.72624	0.004307
583	0.727487	0.004229
584	0.728677	0.004278
585	0.72998	0.004301
586	0.731284	0.004427
587	0.73253	0.004432
588	0.733777	0.004411
589	0.73508	0.004451
590	0.736327	0.004397
591	0.73746	0.004342
592	0.738707	0.004303
593	0.739954	0.004231
594	0.741257	0.004337
595	0.74256	0.004283
596	0.743807	0.004358
597	0.745054	0.004387
598	0.746357	0.00442
599	0.74749	0.004418
600	0.748737	0.004388
601	0.749984	0.004312
602	0.75123	0.004307
603	0.752534	0.004297
604	0.75378	0.004291
605	0.755027	0.004313
606	0.75633	0.004417
607	0.757577	0.004366
608	0.758767	0.004353
609	0.759957	0.004367
610	0.761147	0.004355
611	0.762507	0.004304
612	0.76381	0.004309
613	0.765	0.004301
614	0.766304	0.004316
615	0.767607	0.004257
616	0.768797	0.004425
617	0.769987	0.004428
618	0.771234	0.0044
619	0.772424	0.004371
620	0.773784	0.004422
621	0.780017	0.004234
622	0.786307	0.004373
623	0.792484	0.004282
624	0.79883	0.004385
625	0.80495	0.004239
626	0.811297	0.004398
627	0.817587	0.004343
628	0.823707	0.004428
629	0.830054	0.00458
630	0.836231	0.004723
631	0.842577	0.005236
632	0.848754	0.005844
633	0.855044	0.0071
634	0.861277	0.008913
635	0.867454	0.010536
636	0.873801	0.012489
637	0.87992	0.014255
638	0.886324	0.016132
639	0.892557	0.017363
640	0.898734	0.018388
641	0.905024	0.019436
642	0.911257	0.020711
643	0.917547	0.021921
644	0.923724	0.023388
645	0.930071	0.025005
646	0.936304	0.026846
647	0.942481	0.028314
648	0.948771	0.02996
649	0.955004	0.031358
650	0.961294	0.032734
651	0.967471	0.033635
652	0.973817	0.03449
653	0.980051	0.035543
654	0.986227	0.036737
655	0.992574	0.037882
656	0.998694	0.038183
657	1.0051	0.03818
658	1.01133	0.038969
659	1.01751	0.039159
660	1.02374	0.039661
661	1.02997	0.040469
662	1.03632	0.041351
663	1.0425	0.041654
664	1.04884	0.042584
665	1.05508	0.043178
666	1.06125	0.044082
667	1.06749	0.045004
668	1.07372	0.045722
669	1.08007	0.046834
670	1.08624	0.047984
671	1.09253	0.048991
672	1.09877	0.050021
673	1.105	0.050489
674	1.11129	0.0514
675	1.11741	0.051569
676	1.12381	0.052658
677	1.12999	0.053556
678	1.13628	0.053602
679	1.14257	0.053617
680	1.14875	0.054047
681	1.15509	0.053727
682	1.16121	0.05364
683	1.16756	0.053881
684	1.17379	0.054533
685	1.17997	0.055194
686	1.18632	0.056859
687	1.19249	0.058061
688	1.19878	0.058633
689	1.20502	0.059349
690	1.21131	0.059911
691	1.21754	0.060244
692	1.22372	0.06086
693	1.23006	0.061242
694	1.23613	0.061961
695	1.24259	0.062895
696	1.24876	0.064456
697	1.255	0.065081
698	1.26129	0.065859
699	1.26752	0.066132
700	1.27381	0.065983
701	1.27999	0.066301
702	1.28633	0.067458
703	1.29251	0.069421
704	1.29874	0.069767
705	1.30498	0.069591
706	1.31127	0.070944
707	1.31756	0.072059
708	1.32373	0.072138
709	1.33008	0.073517
710	1.33626	0.073875
711	1.34249	0.073771
712	1.34884	0.074475
713	1.35496	0.073477
714	1.3613	0.075244
715	1.36754	0.076523
716	1.37377	0.076513
717	1.38006	0.076956
718	1.38624	0.077616
719	1.39253	0.077291
720	1.3987	0.078443
721	1.40505	0.07894
722	1.41128	0.077246
723	1.41746	0.076698
724	1.42375	0.078955
725	1.42998	0.0805
726	1.43633	0.081995
727	1.44251	0.083302
728	1.4488	0.084428
729	1.45503	0.085326
730	1.46126	0.085103
731	1.46755	0.085204
732	1.47367	0.085113
733	1.48008	0.086576
734	1.48631	0.088716
735	1.49249	0.089628
736	1.49878	0.091023
737	1.50495	0.091228
738	1.5113	0.092385
739	1.51748	0.092605
740	1.52382	0.094214
741	1.53006	0.096226
742	1.53623	0.097019
743	1.54252	0.098496
744	1.54876	0.099248
745	1.55505	0.099868
746	1.56122	0.100336
747	1.56757	0.101582
748	1.5738	0.103814
749	1.57998	0.104364
750	1.58633	0.105291
751	1.59239	0.107226
752	1.59879	0.107711
753	1.60503	0.109134
754	1.61126	0.110292
755	1.61755	0.111035
756	1.62373	0.111453
757	1.63007	0.113942
758	1.63619	0.114361
759	1.6426	0.11542
760	1.64877	0.116986
761	1.65495	0.117613
762	1.6613	0.118072
763	1.66747	0.119493
764	1.67382	0.121368
765	1.68	0.122175
766	1.68629	0.123612
767	1.69252	0.12547
768	1.69875	0.126511
769	1.70504	0.127346
770	1.71116	0.128429
771	1.71757	0.124358
772	1.7238	0.127493
773	1.73003	0.129411
774	1.73627	0.132169
775	1.7425	0.133062
776	1.74879	0.133836
777	1.75497	0.13536
778	1.76131	0.136445
779	1.76755	0.13615
780	1.77372	0.13846
781	1.78001	0.140193
782	1.78625	0.139897
783	1.79259	0.141666
784	1.79877	0.144387
785	1.80506	0.144061
786	1.8113	0.142598
787	1.81747	0.145624
788	1.82382	0.148989
789	1.82994	0.149443
790	1.83634	0.148714
791	1.84252	0.152624
792	1.84875	0.152932
793	1.85504	0.155312
794	1.86122	0.157962
795	1.86756	0.156419
796	1.87374	0.159898
797	1.88009	0.1611
798	1.88632	0.162858
799	1.8925	0.164742
800	1.89879	0.166501
801	1.90496	0.167728
802	1.91131	0.163734
803	1.91754	0.169964
804	1.92378	0.173203
805	1.93001	0.169667
806	1.93624	0.173878
807	1.94259	0.177442
808	1.94871	0.172877
809	1.95511	0.179199
810	1.96129	0.182682
811	1.96514	0.114468
812	1.96628	0.083537
813	1.97257	0.096337
814	1.97874	0.107289
815	1.98503	0.118246
816	1.99121	0.128593
817	1.99756	0.138735
818	2.00373	0.147675
819	2.01008	0.156433
820	2.01626	0.164042
821	2.02249	0.170289
822	2.02878	0.175254
823	2.0349	0.177033
824	2.04136	0.180126
825	2.04754	0.183073
826	2.05377	0.184522
827	2.06	0.188335
828	2.06624	0.191213
829	2.07253	0.193647
830	2.0787	0.195363
831	2.08505	0.196667
832	2.09129	0.201604
833	2.09746	0.205185
834	2.10375	0.204876
835	2.10998	0.205738
836	2.11633	0.21076
837	2.12251	0.213948
838	2.1288	0.21256
839	2.13503	0.215957
840	2.14127	0.219614
841	2.14756	0.220813
842	2.15367	0.217569
843	2.16008	0.22347
844	2.16626	0.227657
845	2.17249	0.227636
846	2.17504	0.127245
847	2.17634	0.089661
848	2.18257	0.103038
849	2.18881	0.11464
850	2.19498	0.125849
851	2.20127	0.136869
852	2.20745	0.147528
853	2.21386	0.158154
854	2.22003	0.168271
855	2.22627	0.177717
856	2.23256	0.186976
857	2.23873	0.195412
858	2.24508	0.203355
859	2.2512	0.209496
860	2.2576	0.215581
861	2.26378	0.219602
862	2.26995	0.222974
863	2.2763	0.227971
864	2.28248	0.233337
865	2.28883	0.237584
866	2.29494	0.239847
867	2.30129	0.242283
868	2.30758	0.246635
869	2.3137	0.250482
870	2.32005	0.253832
871	2.32617	0.2557
872	2.33257	0.257969
873	2.33875	0.260018
874	2.34498	0.263002
875	2.35127	0.265738
876	2.35756	0.079241
877	2.3638	0.096973
878	2.36997	0.108581
879	2.37632	0.120269
880	2.38255	0.131411
881	2.38873	0.142387
882	2.39502	0.153573
883	2.40119	0.164231
884	2.40754	0.175108
885	2.41377	0.185136
886	2.42007	0.195156
887	2.4263	0.204753
888	2.43248	0.214044
889	2.43877	0.223125
890	2.44494	0.231825
891	2.45134	0.240488
892	2.45752	0.248734
893	2.46375	0.255824
894	2.47004	0.262526
895	2.47622	0.268471
896	2.48257	0.274932
897	2.48875	0.280433
898	2.49509	0.28611
899	2.50127	0.290722
900	2.5075	0.294927
901	2.51379	0.298777
902	2.51997	0.302117
903	2.52631	0.304361
904	2.53249	0.304377
905	2.53878	0.307901
906	2.54507	0.313609
907	2.55119	0.317837
908	2.55754	0.3212
909	2.56366	0.322999
910	2.57006	0.323618
911	2.57267	0.082108
912	2.57879	0.105782
913	2.58496	0.11829
914	2.59131	0.130194
915	2.59749	0.141735
916	2.60384	0.153083
917	2.61001	0.164481
918	2.61625	0.175504
919	2.62254	0.186903
920	2.62866	0.197531
921	2.63506	0.208922
922	2.64129	0.219597
923	2.64752	0.230341
924	2.65376	0.240365
925	2.65999	0.250219
926	2.66628	0.260077
927	2.67246	0.269168
928	2.67881	0.278329
929	2.68504	0.286811
930	2.69122	0.29397
931	2.69751	0.301494
932	2.70374	0.307796
933	2.71008	0.313153
934	2.71626	0.317495
935	2.72255	0.321818
936	2.72878	0.326236
937	2.73496	0.330917
938	2.74131	0.333709
939	2.74397	0.109333
940	2.75004	0.133068
941	2.75621	0.146184
942	2.76256	0.158478
943	2.76868	0.170406
944	2.77508	0.182251
945	2.78126	0.19392
946	2.78749	0.205467
947	2.79378	0.217023
948	2.79996	0.227796
949	2.80631	0.239
950	2.81243	0.248976
951	2.81883	0.259733
952	2.82506	0.269273
953	2.83124	0.278506
954	2.83753	0.287052
955	2.8437	0.295113
956	2.85011	0.303013
957	2.85623	0.310559
958	2.86258	0.317496
959	2.86881	0.323516
960	2.87499	0.32903
961	2.88128	0.335204
962	2.88745	0.338893
963	2.89267	0.152872
964	2.89867	0.174057
965	2.90508	0.187436
966	2.91131	0.199962
967	2.91749	0.212137
968	2.92378	0.224319
969	2.93001	0.236546
970	2.93624	0.249063
971	2.94247	0.261451
972	2.94882	0.274478
973	2.95506	0.28688
974	2.96123	0.298947
975	2.96752	0.31065
976	2.9737	0.321747
977	2.9801	0.332084
978	2.98628	0.341916
979	2.99251	0.350361
980	2.9988	0.357953
981	3.00498	0.362759
982	3.009	0.176631
983	3.01495	0.193866
984	3.0213	0.20892
985	3.02747	0.222815
986	3.03382	0.237115
987	3.04006	0.250569
988	3.04629	0.264053
989	3.05258	0.27678
990	3.05876	0.288765
991	3.06505	0.300647
992	3.07117	0.311204
993	3.07757	0.321014
994	3.0838	0.328776
995	3.09003	0.333309
996	3.09627	0.335825
997	3.1025	0.339836
998	3.10879	0.343475
999	3.11497	0.340737
1000	3.12132	0.345824
1001	3.12755	0.350602
1002	3.13373	0.351369
1003	3.13514	0.219245
1004	3.14132	0.220624
1005	3.14744	0.235909
1006	3.15384	0.251133
1007	3.16007	0.265557
1008	3.16625	0.278733
1009	3.17254	0.29167
1010	3.17872	0.303049
1011	3.18506	0.313646
1012	3.19124	0.321852
1013	3.19753	0.328255
1014	3.20382	0.332451
1015	3.21	0.336854
1016	3.21629	0.340557
1017	3.22241	0.336115
1018	3.22887	0.343528
1019	3.23499	0.348356
1020	3.24009	0.297805
1021	3.24632	0.315151
1022	3.2525	0.329419
1023	3.25879	0.340109
1024	3.26497	0.342286
1025	3.27131	0.34795
1026	3.27749	0.3484
1027	3.28378	0.342867
1028	3.29001	0.352472
1029	3.29624	0.343581
1030	3.30254	0.353795
1031	3.30865	0.355551
1032	3.31512	0.354015
1033	3.32129	0.359942
1034	3.32747	0.35836
1035	3.33376	0.362893
1036	3.33999	0.347583
1037	3.34628	0.359244
1038	3.35246	0.360131
1039	3.3588	0.36176
1040	3.36504	0.365395
1041	3.37121	0.365802
1042	3.37751	0.368283
1043	3.38374	0.369356
1044	3.39009	0.372509
1045	3.39626	0.374822
1046	3.40255	0.377542
1047	3.40878	0.38086
1048	3.41502	0.382031
1049	3.42131	0.385982
1050	3.42743	0.389594
1051	3.43383	0.389979
1052	3.44001	0.395106
1053	3.44618	0.394367
1054	3.45253	0.399529
1055	3.45877	0.400868
1056	3.46505	0.401801
1057	3.47123	0.406271
1058	3.47758	0.408265
1059	3.48381	0.411974
1060	3.48993	0.414152
1061	3.49628	0.416426
1062	3.50245	0.418623
1063	3.5088	0.420716
1064	3.51504	0.422538
1065	3.52133	0.42699
1066	3.5275	0.429816
1067	3.53374	0.429158
1068	3.54008	0.433644
1069	3.5462	0.434632
1070	3.55255	0.437684
1071	3.55397	0.058157
1072	3.55748	0.081545
1073	3.56383	0.092499
1074	3.57	0.101804
1075	3.57624	0.11059
1076	3.58252	0.118024
1077	3.58876	0.121594
1078	3.59505	0.124338
1079	3.60123	0.127682
1080	3.60757	0.129898
1081	3.61381	0.132294
1082	3.61998	0.135064
1083	3.62627	0.13823
1084	3.63239	0.14198
1085	3.63885	0.145128
1086	3.64503	0.147462
1087	3.65121	0.14899
1088	3.65755	0.131753
1089	3.66373	0.138351
1090	3.67008	0.135184
1091	3.6762	0.141333
1092	3.6826	0.1446
1093	3.68883	0.147492
1094	3.69495	0.149316
1095	3.7013	0.151606
1096	3.70748	0.153991
1097	3.71382	0.156638
1098	3.72	0.160044
1099	3.72629	0.161799
1100	3.73258	0.162738
1101	3.7387	0.161585
1102	3.74505	0.164652
1103	3.75116	0.167106
1104	3.75757	0.168765
1105	3.7638	0.169932
1106	3.76998	0.171659
1107	3.77627	0.173489
1108	3.7825	0.176011
1109	3.78879	0.177592
1110	3.79497	0.17966
1111	3.80132	0.181943
1112	3.80766	0.015349
1113	3.81372	0.030758
1114	3.82002	0.03714
1115	3.82625	0.036654
1116	3.8326	0.040623
1117	3.83877	0.036081
1118	3.84506	0.039365
1119	3.85129	0.041731
1120	3.85747	0.044536
1121	3.86303	0.047225
Specimen: 2
Number of data points: 1051
Maximum Load point: 973 Maximum Load: 0.42128 kN
Maximum Extension point: 1051 Maximum Extension: 3.62276 mm
___________________________________________________
1	0	-2e-06
2	0.000453	-0.000372
3	0.001813	-0.000342
4	0.003343	-0.000189
5	0.004817	-0.000283
6	0.00612	-0.000203
7	0.007423	-0.000151
8	0.00867	-0.000215
9	0.009973	-0.000178
10	0.011163	-0.000245
11	0.01241	-0.000288
12	0.0136	-0.000253
13	0.014903	-0.000239
14	0.016207	-0.000166
15	0.017397	-0.000261
16	0.018643	-0.000161
17	0.019947	-0.000107
18	0.021137	-0.000127
19	0.022383	-0.000205
20	0.023687	-0.000186
21	0.024877	-0.000238
22	0.02618	-0.000298
23	0.027427	-0.000225
24	0.028673	-0.000274
25	0.02992	-0.000181
26	0.031223	-0.000121
27	0.032413	-0.000127
28	0.03366	-0.00013
29	0.03485	-0.000121
30	0.036153	-0.000136
31	0.037457	-0.00024
32	0.038703	-0.000159
33	0.03995	-0.000194
34	0.041253	-0.000139
35	0.0425	-0.000231
36	0.04369	-0.000224
37	0.044937	-9.7e-05
38	0.046127	-0.000168
39	0.04743	-0.000215
40	0.048733	-0.000131
41	0.04998	-0.00022
42	0.051227	-0.000224
43	0.05253	-0.00025
44	0.053663	-0.000206
45	0.05491	-0.000337
46	0.056157	-0.000183
47	0.057403	-0.000137
48	0.058707	-0.000183
49	0.059953	-0.000156
50	0.061257	-0.000196
51	0.062503	-0.000322
52	0.06375	-0.000259
53	0.06494	-0.000112
54	0.066187	-0.000225
55	0.067377	-0.000203
56	0.06868	-0.0001
57	0.069983	-0.000195
58	0.071173	-0.000152
59	0.072477	-0.000218
60	0.07378	-0.00024
61	0.07497	-0.00014
62	0.07616	-0.000152
63	0.077407	-0.000163
64	0.078653	-0.000269
65	0.079957	-0.000117
66	0.081203	-0.000107
67	0.08245	-9.5e-05
68	0.083753	-0.000141
69	0.085	-0.000239
70	0.08619	-0.000184
71	0.087437	-0.000282
72	0.088627	-0.000263
73	0.08993	-0.000131
74	0.091233	-0.000165
75	0.09248	-0.000211
76	0.093727	-0.000208
77	0.09503	-0.000196
78	0.09622	-0.000159
79	0.09741	-0.000254
80	0.098657	-0.000189
81	0.099903	-0.000263
82	0.101207	-0.000146
83	0.10251	-0.000298
84	0.103757	-0.000235
85	0.105003	-0.000213
86	0.106307	-3.3e-05
87	0.10744	-0.000185
88	0.108687	-0.000102
89	0.109933	-0.000168
90	0.11118	-0.000205
91	0.112427	-0.000173
92	0.113673	-0.000141
93	0.11492	-0.000155
94	0.116167	-8.7e-05
95	0.117527	-0.0002
96	0.11866	-0.000183
97	0.119907	-7.4e-05
98	0.121097	-0.000158
99	0.122457	-0.000238
100	0.12376	-0.000107
101	0.12495	-0.000194
102	0.126253	-0.000189
103	0.127557	-0.000226
104	0.128747	-0.000191
105	0.129937	-0.000226
106	0.131183	-0.000135
107	0.132373	-0.000111
108	0.133733	-0.000109
109	0.13498	-0.000245
110	0.136227	-0.000104
111	0.137473	-0.000256
112	0.138777	-0.000186
113	0.139967	-0.000233
114	0.141157	-0.000188
115	0.142347	-0.000151
116	0.143707	-0.000166
117	0.14501	-0.000161
118	0.1462	-0.000176
119	0.147503	-0.000179
120	0.14875	-0.000121
121	0.149997	-0.000161
122	0.151187	-0.000188
123	0.152433	-0.000253
124	0.153567	-0.000218
125	0.154927	-0.000238
126	0.15623	-0.000159
127	0.157477	-7.9e-05
128	0.15878	-0.000218
129	0.160027	-8.5e-05
130	0.161217	-7.6e-05
131	0.162407	-0.00029
132	0.163653	-0.000196
133	0.1649	-0.000223
134	0.16626	-0.000152
135	0.167507	-0.000142
136	0.168753	-0.000126
137	0.17	-0.000112
138	0.171247	-0.000231
139	0.172437	-0.000229
140	0.173683	-9.5e-05
141	0.174873	-0.000117
142	0.176177	-0.000199
143	0.17748	-0.000173
144	0.17867	-0.000218
145	0.18003	-0.00022
146	0.181277	-0.00013
147	0.182467	-0.000201
148	0.183657	-0.000141
149	0.18496	-0.000126
150	0.186093	-0.000115
151	0.187453	-0.000135
152	0.188757	-0.000176
153	0.189947	-0.000208
154	0.19125	-0.00033
155	0.192553	-0.000124
156	0.193743	-0.000165
157	0.194877	-0.00015
158	0.19618	-0.000159
159	0.19737	-0.000176
160	0.19873	-0.000251
161	0.199977	-0.000135
162	0.201223	-0.000155
163	0.202527	-0.000205
164	0.203773	-0.000198
165	0.204907	-0.000189
166	0.206153	-0.000146
167	0.2074	-0.000226
168	0.208703	-0.000155
169	0.210007	-0.000131
170	0.211197	-0.000231
171	0.2125	-0.000174
172	0.213747	-0.000276
173	0.214993	-0.000186
174	0.216183	-0.000198
175	0.21743	-0.000241
176	0.21862	-0.000194
177	0.219923	-0.000179
178	0.221227	-0.000152
179	0.222473	-0.000126
180	0.22372	-0.000215
181	0.225023	-0.000209
182	0.226213	-0.000158
183	0.227403	-0.000183
184	0.228707	-0.000256
185	0.229897	-0.000309
186	0.231257	-0.000243
187	0.232447	-0.000204
188	0.233693	-0.000163
189	0.234997	-0.000181
190	0.236243	-0.000263
191	0.237433	-0.000239
192	0.23868	-0.000304
193	0.239927	-0.000215
194	0.241173	-0.000264
195	0.242533	-0.000186
196	0.243723	-0.000236
197	0.24497	-0.000185
198	0.246273	-0.000198
199	0.247463	-0.00021
200	0.248653	-0.000198
201	0.249957	-0.000206
202	0.251147	-0.000156
203	0.252507	-0.000112
204	0.253753	-0.000244
205	0.255	-0.000213
206	0.256247	-0.000184
207	0.25755	-0.000163
208	0.258683	-0.000168
209	0.259873	-0.000236
210	0.261177	-5.9e-05
211	0.262423	-0.000215
212	0.263727	-0.000264
213	0.264973	-0.000271
214	0.26622	-0.000168
215	0.267523	-0.000194
216	0.26877	-0.000193
217	0.269904	-0.000132
218	0.27115	-0.000214
219	0.272397	-0.000231
220	0.2737	-0.00017
221	0.275003	-0.000196
222	0.276193	-0.000189
223	0.277497	-0.00011
224	0.2788	-0.000135
225	0.27999	-0.000174
226	0.28118	-0.000201
227	0.282427	-0.000181
228	0.283617	-0.000134
229	0.284977	-0.000215
230	0.28628	-0.0002
231	0.28747	-0.00015
232	0.288717	-0.000225
233	0.29002	-0.000141
234	0.29121	-0.00017
235	0.2924	-0.000245
236	0.293647	-0.000199
237	0.29495	-0.000183
238	0.296254	-0.000214
239	0.2975	-0.000226
240	0.298747	-0.000164
241	0.299994	-0.000208
242	0.30124	-0.000205
243	0.302374	-0.000115
244	0.303677	-0.000155
245	0.304867	-0.000142
246	0.306227	-0.000163
247	0.30753	-6.2e-05
248	0.30872	-0.000171
249	0.310024	-0.000145
250	0.31127	-0.00016
251	0.31246	-0.000116
252	0.31365	-0.000166
253	0.314954	-0.00012
254	0.316144	-0.000261
255	0.317447	-0.000208
256	0.31875	-0.000214
257	0.319997	-0.000139
258	0.321244	-9.6e-05
259	0.322547	-0.000127
260	0.32368	-0.000139
261	0.324927	-0.000201
262	0.326117	-0.000155
263	0.32742	-0.000163
264	0.328724	-0.000154
265	0.32997	-0.000175
266	0.331217	-0.000196
267	0.33252	-0.000102
268	0.333767	-6.2e-05
269	0.3349	-0.000117
270	0.336147	-8.5e-05
271	0.337394	-0.000144
272	0.338754	-0.000194
273	0.34	-0.000178
274	0.341247	-0.00021
275	0.342494	-0.000163
276	0.34374	-0.000175
277	0.34493	-0.000117
278	0.34612	-0.000149
279	0.347424	-0.000203
280	0.34867	-0.000164
281	0.349974	-0.000161
282	0.35122	-0.000115
283	0.352467	-0.000152
284	0.35377	-0.000285
285	0.355017	-0.00016
286	0.356207	-8.7e-05
287	0.357397	-9.5e-05
288	0.358587	-0.000165
289	0.359947	-0.000105
290	0.36125	-0.000199
291	0.362497	-0.000205
292	0.3638	-0.00026
293	0.365047	-9.9e-05
294	0.366237	-0.000213
295	0.367427	-0.000179
296	0.368674	-0.000215
297	0.36992	-9.9e-05
298	0.371224	-0.000155
299	0.37247	-0.00014
300	0.373717	-0.000135
301	0.37502	-0.000211
302	0.376267	-0.000156
303	0.377457	-0.000132
304	0.378704	-0.000155
305	0.379894	-9.5e-05
306	0.381197	-0.000259
307	0.382444	-0.000106
308	0.38369	-0.000127
309	0.384994	-0.00014
310	0.38624	-8.4e-05
311	0.387487	-0.000121
312	0.388677	-0.000142
313	0.389924	-0.000161
314	0.391114	-0.00026
315	0.392474	-0.000159
316	0.393777	-4.9e-05
317	0.394967	-5.5e-05
318	0.39627	-9.4e-05
319	0.397574	-0.000101
320	0.398707	-9.7e-05
321	0.399897	-0.000254
322	0.401144	-0.000215
323	0.40239	-0.000183
324	0.403694	-0.000145
325	0.404997	-0.000169
326	0.406244	-0.0002
327	0.407547	-0.000106
328	0.408737	-3e-05
329	0.409927	-9.5e-05
330	0.411174	-3.9e-05
331	0.412364	-0.000154
332	0.413667	-0.000163
333	0.41497	-8.4e-05
334	0.41616	-0.000114
335	0.417464	-0.000163
336	0.418767	-0.000137
337	0.420014	-0.000114
338	0.421204	-4.6e-05
339	0.42245	-3.3e-05
340	0.423584	-9.7e-05
341	0.424944	-2.8e-05
342	0.426247	-0.000127
343	0.427437	-0.000183
344	0.42874	-0.000206
345	0.430044	-0.00018
346	0.431234	-0.000142
347	0.432424	-0.000127
348	0.43367	-0.000104
349	0.434917	-0.000132
350	0.43622	0
351	0.437467	-0.000179
352	0.438714	-8.7e-05
353	0.440017	-0.000107
354	0.441264	-0.000203
355	0.442454	-8.2e-05
356	0.443644	-0.000135
357	0.44489	-2.3e-05
358	0.446194	-8.1e-05
359	0.447497	-8.7e-05
360	0.448687	5e-06
361	0.44999	-4.7e-05
362	0.451294	-9e-05
363	0.452484	-0.000117
364	0.453674	-7e-05
365	0.45492	-0.000166
366	0.45611	-0.000141
367	0.457414	-8.4e-05
368	0.458717	-0.000114
369	0.459964	-0.000115
370	0.46121	-2.5e-05
371	0.46257	-0.000124
372	0.463704	-0.00013
373	0.464894	-0.000189
374	0.466197	-0.000178
375	0.467387	-0.000126
376	0.468747	-0.000141
377	0.469937	-9.1e-05
378	0.471184	-8.1e-05
379	0.472487	-7.9e-05
380	0.473734	-3.6e-05
381	0.474924	-9.2e-05
382	0.47617	-0.000215
383	0.477417	-0.000198
384	0.47872	-0.00018
385	0.479967	-7.9e-05
386	0.481214	-8.4e-05
387	0.482517	-6.2e-05
388	0.483764	-0.000125
389	0.48501	-5.1e-05
390	0.486144	-7.9e-05
391	0.487447	-0.000131
392	0.488637	-0.000126
393	0.48994	-0.000136
394	0.491244	-0.000191
395	0.49249	-9.5e-05
396	0.493737	-0.000201
397	0.49504	-0.00012
398	0.496174	-0.000124
399	0.49742	-0.00011
400	0.498667	-0.000112
401	0.499914	-0.000174
402	0.501217	-0.000135
403	0.502464	-0.000175
404	0.503767	-0.00019
405	0.505014	-0.000142
406	0.50626	-0.000114
407	0.507394	-2.5e-05
408	0.50864	-3.9e-05
409	0.509887	-9.2e-05
410	0.51119	-1.8e-05
411	0.512494	-0.00014
412	0.513684	-0.000178
413	0.514987	-0.000179
414	0.51629	-0.000245
415	0.51748	-0.000178
416	0.51867	-0.000151
417	0.519974	-4.4e-05
418	0.521164	-0.000132
419	0.522467	-0.000184
420	0.523714	-0.000179
421	0.52496	-0.000124
422	0.526264	-0.00022
423	0.52751	-0.000226
424	0.528644	-0.000226
425	0.52989	-0.000199
426	0.531137	-0.0001
427	0.53244	-0.000145
428	0.533744	-5.5e-05
429	0.53499	-0.0001
430	0.536237	-6.6e-05
431	0.537484	-0.000156
432	0.538787	-0.000173
433	0.53992	-9.5e-05
434	0.541167	-0.000109
435	0.542357	-0.000216
436	0.543717	-0.000168
437	0.544964	-4.7e-05
438	0.54621	-0.000142
439	0.547514	-8e-05
440	0.54876	-1.2e-05
441	0.54995	-0.000122
442	0.55114	-0.000112
443	0.552444	-0.000161
444	0.55369	-0.000269
445	0.554994	-9.5e-05
446	0.55624	-3.9e-05
447	0.557487	-5.7e-05
448	0.558734	-0.000104
449	0.560037	-9.4e-05
450	0.56117	1.2e-05
451	0.562417	-0.000121
452	0.563607	-8.6e-05
453	0.564967	-0.000126
454	0.566214	-0.000107
455	0.56746	-0.000145
456	0.568707	-6e-05
457	0.57001	-4.2e-05
458	0.571257	-6.4e-05
459	0.57239	-0.000135
460	0.573694	-0.000132
461	0.574884	-0.000179
462	0.576187	-0.000124
463	0.57749	-0.00016
464	0.578737	-2.3e-05
465	0.579984	-0.00017
466	0.581287	-0.000151
467	0.582477	-0.000104
468	0.583667	-0.000127
469	0.584914	-9.7e-05
470	0.58616	-0.000131
471	0.587464	-0.000135
472	0.58871	-0.00013
473	0.590014	-0.000114
474	0.59126	-0.000115
475	0.592507	-0.000175
476	0.59364	-5.1e-05
477	0.594944	-8.4e-05
478	0.596077	-7.9e-05
479	0.597437	-1.3e-05
480	0.59874	-4.2e-05
481	0.599987	-7.2e-05
482	0.601234	-0.000161
483	0.602537	-0.000144
484	0.603727	-0.000114
485	0.604917	-0.000139
486	0.606164	-7.6e-05
487	0.607354	-0.000137
488	0.608714	-6.6e-05
489	0.610017	-6e-06
490	0.611264	-0.000159
491	0.61251	-0.000116
492	0.613757	-0.000158
493	0.614947	-0.000122
494	0.616194	-8.5e-05
495	0.617327	-0.000112
496	0.618687	-7e-05
497	0.61999	-0.000104
498	0.62118	3.2e-05
499	0.622427	-3.2e-05
500	0.62373	-2.6e-05
501	0.625034	-5e-05
502	0.626167	-0.000119
503	0.62747	-7e-05
504	0.628604	-6e-05
505	0.629964	-8.5e-05
506	0.631267	-6.4e-05
507	0.632457	-4.7e-05
508	0.63376	-0.000109
509	0.635007	-0.000116
510	0.636254	-0.000132
511	0.637387	-0.000139
512	0.63869	-0.000122
513	0.639937	-0.000163
514	0.64124	-0.000104
515	0.642487	-9.7e-05
516	0.643734	-4.5e-05
517	0.645037	4e-06
518	0.646284	-2e-05
519	0.647474	-8.7e-05
520	0.648664	-4.1e-05
521	0.64991	-8.9e-05
522	0.651157	-8.7e-05
523	0.65246	-8.2e-05
524	0.653707	-4.9e-05
525	0.65501	-9.4e-05
526	0.656257	-7.7e-05
527	0.657504	-7e-06
528	0.658637	-0.00013
529	0.65994	-0.000149
530	0.66113	-5.5e-05
531	0.662434	-0.000105
532	0.663737	-0.000199
533	0.664927	-0.000106
534	0.66623	-9e-05
535	0.667534	-0.000126
536	0.668724	-0.000141
537	0.669914	-7.5e-05
538	0.67116	-4.7e-05
539	0.672407	-8e-05
540	0.67371	-5.9e-05
541	0.674957	-5.9e-05
542	0.676204	-2.5e-05
543	0.677507	-8.4e-05
544	0.678754	-0.000105
545	0.679944	-0.000105
546	0.68119	-0.000134
547	0.68238	-6.9e-05
548	0.683684	-1.1e-05
549	0.684987	1.2e-05
550	0.686234	-6.1e-05
551	0.687537	-7.1e-05
552	0.688784	-0.00014
553	0.689974	-5.5e-05
554	0.691164	-8.2e-05
555	0.69241	-0.000164
556	0.6936	-8.1e-05
557	0.69496	-6.1e-05
558	0.696264	-6.9e-05
559	0.697454	-0.000119
560	0.698757	0.000116
561	0.700004	0.000149
562	0.701194	0.000416
563	0.70244	0.000461
564	0.703687	0.000612
565	0.704934	0.000401
566	0.706237	0.000571
567	0.707484	0.000941
568	0.708787	0.001242
569	0.710034	0.001553
570	0.71128	0.001626
571	0.712414	0.001755
572	0.71366	0.001809
573	0.71485	0.001867
574	0.71621	0.001959
575	0.717514	0.002027
576	0.718704	0.002069
577	0.720007	0.00222
578	0.721254	0.002579
579	0.7225	0.003269
580	0.72369	0.003774
581	0.724937	0.004289
582	0.731227	0.004319
583	0.737404	0.004305
584	0.743751	0.004393
585	0.75004	0.004307
586	0.75616	0.004409
587	0.762507	0.004414
588	0.768627	0.004385
589	0.774974	0.004309
590	0.781207	0.004423
591	0.787441	0.004353
592	0.79373	0.004365
593	0.799907	0.004325
594	0.806254	0.004286
595	0.812374	0.00433
596	0.818777	0.00442
597	0.824954	0.004375
598	0.831187	0.004473
599	0.837477	0.004289
600	0.84371	0.004394
601	0.850001	0.004397
602	0.856177	0.004383
603	0.862524	0.004323
604	0.868757	0.004453
605	0.874934	0.004389
606	0.881167	0.004457
607	0.887401	0.004291
608	0.893747	0.004407
609	0.899924	0.004348
610	0.906214	0.004368
611	0.912447	0.004392
612	0.918681	0.004384
613	0.925027	0.004379
614	0.931147	0.004456
615	0.937551	0.004322
616	0.943727	0.004447
617	0.949904	0.004395
618	0.956251	0.004384
619	0.962427	0.004389
620	0.968717	0.004398
621	0.974951	0.004433
622	0.981241	0.004363
623	0.987474	0.004494
624	0.993651	0.004403
625	0.999997	0.004418
626	1.00612	0.004452
627	1.01252	0.004429
628	1.01875	0.004446
629	1.02499	0.004417
630	1.03122	0.004466
631	1.03745	0.004399
632	1.0438	0.004412
633	1.04992	0.004387
634	1.05627	0.004367
635	1.0625	0.004457
636	1.06868	0.004402
637	1.07491	0.004431
638	1.08114	0.004506
639	1.08749	0.004486
640	1.09367	0.004479
641	1.10001	0.004457
642	1.10619	0.004462
643	1.11242	0.004486
644	1.11866	0.004536
645	1.12495	0.004496
646	1.13129	0.004461
647	1.13747	0.004488
648	1.1437	0.004553
649	1.14999	0.004526
650	1.15617	0.004503
651	1.16252	0.004511
652	1.16864	0.004518
653	1.17498	0.004483
654	1.18122	0.004462
655	1.18739	0.00455
656	1.19374	0.00456
657	1.19997	0.004502
658	1.20626	0.004539
659	1.21244	0.004572
660	1.21879	0.004541
661	1.22496	0.004546
662	1.23114	0.004523
663	1.23749	0.004538
664	1.24361	0.004536
665	1.25001	0.004523
666	1.25624	0.004518
667	1.26248	0.004538
668	1.26871	0.004631
669	1.27494	0.004581
670	1.28123	0.004555
671	1.28735	0.004498
672	1.29376	0.004509
673	1.29999	0.00464
674	1.30617	0.004596
675	1.31246	0.004645
676	1.31869	0.004744
677	1.32498	0.004989
678	1.33116	0.00523
679	1.3375	0.005976
680	1.34374	0.007569
681	1.34991	0.008973
682	1.35626	0.010545
683	1.36238	0.011708
684	1.36878	0.012489
685	1.37496	0.013741
686	1.38119	0.015328
687	1.38748	0.016965
688	1.39366	0.018868
689	1.40001	0.021763
690	1.40613	0.025693
691	1.41253	0.029884
692	1.41871	0.034326
693	1.42494	0.038946
694	1.43123	0.043886
695	1.43741	0.049246
696	1.44375	0.055336
697	1.44993	0.061436
698	1.45622	0.068042
699	1.46251	0.074416
700	1.46869	0.080623
701	1.47498	0.08669
702	1.4811	0.092382
703	1.4875	0.097936
704	1.49373	0.103206
705	1.49997	0.10791
706	1.5062	0.112181
707	1.51249	0.115846
708	1.51878	0.119443
709	1.5249	0.122706
710	1.53125	0.126042
711	1.53748	0.129464
712	1.54366	0.132682
713	1.54995	0.135894
714	1.55618	0.139273
715	1.56253	0.142615
716	1.5687	0.145889
717	1.57499	0.149373
718	1.58123	0.152599
719	1.5874	0.155195
720	1.59375	0.15813
721	1.59987	0.161059
722	1.60627	0.164033
723	1.61245	0.166778
724	1.61868	0.16935
725	1.62497	0.171867
726	1.63115	0.174229
727	1.6375	0.177272
728	1.64362	0.17994
729	1.65002	0.182748
730	1.6562	0.18467
731	1.66243	0.186392
732	1.66872	0.189072
733	1.67495	0.191099
734	1.68119	0.193361
735	1.68748	0.195281
736	1.69377	0.196874
737	1.7	0.199209
738	1.70618	0.201127
739	1.71247	0.202795
740	1.71859	0.203984
741	1.72505	0.205547
742	1.73122	0.208023
743	1.73746	0.209696
744	1.74369	0.211208
745	1.74992	0.213078
746	1.75627	0.215042
747	1.76239	0.215539
748	1.76874	0.216603
749	1.77497	0.218373
750	1.7812	0.221212
751	1.78749	0.222014
752	1.79367	0.220932
753	1.79996	0.22125
754	1.80619	0.223075
755	1.81248	0.222768
756	1.81872	0.224419
757	1.82489	0.22649
758	1.83124	0.227947
759	1.83742	0.223901
760	1.84376	0.225066
761	1.84994	0.228235
762	1.85617	0.229317
763	1.86246	0.228526
764	1.86864	0.229929
765	1.87499	0.227934
766	1.88116	0.218098
767	1.88751	0.217443
768	1.89374	0.219325
769	1.89998	0.174304
770	1.90122	0.047729
771	1.90752	0.058889
772	1.91363	0.06722
773	1.92004	0.075957
774	1.92621	0.083711
775	1.93239	0.088208
776	1.93874	0.093057
777	1.94491	0.09723
778	1.95126	0.100367
779	1.95744	0.10393
780	1.96373	0.106427
781	1.96996	0.109451
782	1.97619	0.111255
783	1.98249	0.11423
784	1.9886	0.116605
785	1.99501	0.119776
786	2.00118	0.123849
787	2.00747	0.125014
788	2.01371	0.127984
789	2.01994	0.131462
790	2.02623	0.135723
791	2.03241	0.139987
792	2.03876	0.143612
793	2.04499	0.146502
794	2.05117	0.147049
795	2.05746	0.149066
796	2.06369	0.152108
797	2.06998	0.154259
798	2.07621	0.156511
799	2.0825	0.159104
800	2.08873	0.161106
801	2.09491	0.161517
802	2.10126	0.163192
803	2.10738	0.164261
804	2.11378	0.162872
805	2.11996	0.165303
806	2.12619	0.167496
807	2.13248	0.167669
808	2.13866	0.169723
809	2.145	0.17368
810	2.15118	0.177637
811	2.15753	0.181079
812	2.16371	0.182404
813	2.16994	0.184422
814	2.17623	0.188564
815	2.18235	0.19221
816	2.18875	0.195246
817	2.19493	0.198519
818	2.20122	0.200601
819	2.20745	0.201882
820	2.21368	0.205484
821	2.22003	0.210295
822	2.22609	0.213817
823	2.23256	0.21719
824	2.23873	0.2175
825	2.24491	0.218125
826	2.2512	0.22315
827	2.25743	0.227479
828	2.26372	0.231331
829	2.2699	0.233885
830	2.27624	0.234406
831	2.28248	0.232619
832	2.28865	0.237846
833	2.295	0.242782
834	2.30118	0.246611
835	2.30753	0.249299
836	2.3137	0.24815
837	2.31999	0.251715
838	2.32622	0.25718
839	2.33246	0.262466
840	2.33875	0.267407
841	2.34487	0.271828
842	2.35127	0.275886
843	2.35745	0.2787
844	2.36368	0.276635
845	2.36997	0.27232
846	2.37621	0.279183
847	2.3825	0.2859
848	2.38867	0.29142
849	2.39502	0.29673
850	2.40125	0.300914
851	2.40743	0.304854
852	2.41372	0.308648
853	2.41989	0.311989
854	2.42624	0.314089
855	2.43248	0.312304
856	2.43877	0.309235
857	2.445	0.316645
858	2.45118	0.322264
859	2.45752	0.32793
860	2.46359	0.332342
861	2.47004	0.336912
862	2.47622	0.340187
863	2.48245	0.341059
864	2.48381	0.273165
865	2.48495	0.080745
866	2.49124	0.093931
867	2.49747	0.104174
868	2.50371	0.11385
869	2.50999	0.123348
[truncated: 10,981 more rows]
